# Supplementary material for: Tumor Fusion Burden as a Hallmark of Immune Infiltration in Prostate Cancer
Source: Oxford University Press journal article supplement (doi:10.1158/2326-6066.cir-19-0568), 2020-04-22
Supplement: 23266066cir190568-sup-226185_3_supp_6085558_q5jqhx.xlsx [file 23266066cir190568-sup-226185_3_supp_6085558_q5jqhx.xlsx]

## Sheet: S-Table1
Specimen	Diagnopsis	Disease stage	Metastasis site	TNM staging	Gleason score (if known)	Drug therapy (if known)
HP-82164	Benign Hyperplasia	BPH
HP-82165	Benign Hyperplasia	BPH
HP-82166	Benign Hyperplasia	BPH
HP-82168	Benign Hyperplasia	BPH
HP-82169	Benign Hyperplasia	BPH
HP-82170	Benign Hyperplasia	BPH
HP-82171	Benign Hyperplasia	BPH
HP-82172	Benign Hyperplasia	BPH
HP-82173	Benign Hyperplasia	BPH
HP-90387	Benign Hyperplasia	BPH
HP-106388	Adenocarcinoma; CRPC	Early/Intermediate		T2bN0M0(II)	G2
HP-63198	Adenocarcinoma	Early/Intermediate		T2 N0 M0
HP-63199	Adenocarcinoma	Early/Intermediate		T2 N0 M0
HP-63201	Adenocarcinoma	Early/Intermediate		T2 N0 M0
HP-63202	Adenocarcinoma	Early/Intermediate		T2 N0 M0	G4
HP-63204	Adenocarcinoma	Early/Intermediate		T2 N0 M0	G6
HP-63205	Adenocarcinoma	Early/Intermediate		T2 N0 M0	G5
HP-63208	Adenocarcinoma	Early/Intermediate		T1 N0 M0
HP-63210	Adenocarcinoma	Early/Intermediate		T2 N0 M0
HP-63211	Adenocarcinoma	Early/Intermediate		T2 N0 M0	G5
HP-64941	Adenocarcinoma	Early/Intermediate		T2N0M0	G5
HP-64945	Adenocarcinoma	Early/Intermediate		T2N0M0	G6
HP-64951	Adenocarcinoma	Early/Intermediate		T2N0M0	G4
HP-69716	Adenocarcinoma	Early/Intermediate		pT2c
HP-69725	Adenocarcinoma	Early/Intermediate		T2 N0 MX
HP-69733	Adenocarcinoma	Early/Intermediate		pT2 N0 MX
HP-69739	Adenocarcinoma	Early/Intermediate		pT2 N0 MX
HP-69742	Adenocarcinoma	Early/Intermediate		pT2 N0 MX
HP-69744	Adenocarcinoma	Early/Intermediate		pT2 N0 MX
HP-69745	Adenocarcinoma	Early/Intermediate		pT2 N0 MX
HP-69746	Adenocarcinoma	Early/Intermediate		pT2 N0 MX
HP-69747	Adenocarcinoma	Early/Intermediate		pT2 N0 MX
HP-69750	Adenocarcinoma	Early/Intermediate		p T2 R1 N0 Mx
HP-81398	Adenocarcinoma	Early/Intermediate		T2a_N0_MX(Stage III)
HP-82843	Adenocarcinoma	Early/Intermediate		T2c_N0_M0(IIB)	G7
HP-82846	Adenocarcinoma	Early/Intermediate		T2c_N0_M0(IIB)	G7
HP-82850	Adenocarcinoma	Early/Intermediate		T2c_N0_M0(IIB)	G7
HP-82854	Adenocarcinoma	Early/Intermediate		T2c_N0_M0(IIB)	G7
HP-82859	Adenocarcinoma	Early/Intermediate		T2c_N0_M0(IIB)	G7
HP-82862	Adenocarcinoma	Early/Intermediate		T2c_N0_M0(IIB)	G7
HP-82874	Adenocarcinoma	Early/Intermediate		T2c_N0_M0(IIB)	G6
HP-82881	Adenocarcinoma	Early/Intermediate		T2b_N0_M0(IIA)	G8
HP-106386	Adenocarcinoma; CRPC	Late		T3aN0M0(III)	G3
HP-106387	Adenocarcinoma; CRPC	Late		T3bN0M0(III)	G3
HP-106389	Adenocarcinoma; CRPC	Late		T3bN1M0(IV)	G3
HP-50619	Adenocarcinoma	Late		XXX(Unstaged)	G9	Lupron
HP-50626	Adenocarcinoma	Late		XXX(Unstaged)	G9	Surgury - Bilateral Orchiectomy
HP-50644	Adenocarcinoma	Late		XXX(Unstaged)	G8	Lupron, Casodex
HP-70352	Adenocarcinoma	Late		T3N1MX(IV)	G9	Casodex
HP-70353	Adenocarcinoma	Late		T3N1MX(IV)	G9	Casodex
HP-70354	Adenocarcinoma	Late		T3N0M0(III)	G9	Enalapril
HP-70355	Adenocarcinoma	Late		T3bN0M0(III)	G7	Humulin 70/30, Lisinopril, Metformin, Aspirin
HP-70356	Adenocarcinoma	Late		T3bN0M0(III)	G7	Humulin 70/30, Lisinopril, Metformin, Aspirin
HP-80761	Adenocarcinoma	Late		T3b_N1_M0(IV)	G4
HP-80766	Adenocarcinoma	Late		T3b_N1_M0(IV)	G4
HP-81353	Adenocarcinoma	Late		T3_N1_MX(Stage IV)
HP-81355	Adenocarcinoma	Late		T3_N1_MX(Stage IV)
HP-81357	Adenocarcinoma	Late		T3b_N1_MX(Stage IV)
HP-81359	Adenocarcinoma	Late		T3b_N1_MX(Stage IV)
HP-81366	Adenocarcinoma	Late		T3b_N0_MX(Stage III)
HP-81367	Adenocarcinoma	Late		T3b_N0_MX(Stage III)
HP-81369	Adenocarcinoma	Late		T3_N0_MX(Stage III)
HP-81370	Adenocarcinoma	Late		T3a_N0_MX(Stage III)
HP-81376	Adenocarcinoma	Late		T3b_N0_MX(Stage III)
HP-81382	Adenocarcinoma	Late		T3a_N0_MX(Stage III)
HP-81384	Adenocarcinoma	Late		T3b_N0_MX(Stage III)
HP-81385	Adenocarcinoma	Late		T3b_N1_MX(Stage IV)
HP-81387	Adenocarcinoma	Late		T3b_N0_MX(Stage III)
HP-81388	Adenocarcinoma	Late		T3a_N0_MX(Stage III)
HP-81391	Adenocarcinoma	Late		T3a_N0_MX(Stage III)
HP-81393	Adenocarcinoma	Late		T3b_N0_MX(Stage III)
HP-81395	Adenocarcinoma	Late		T3a_N0_MX(Stage III)
HP-82479	Adenocarcinoma	Late		III	G3	Hormone,Radiation,Biopsy,Surgery
HP-82482	Adenocarcinoma	Late		IV	G3	Hormone,Biopsy,Surgery
HP-82483	Adenocarcinoma	Late		IV	G3	Biopsy,Surgery
HP-82486	Adenocarcinoma	Late		III	G3	Radiation,Biopsy,Surgery
HP-82491	Adenocarcinoma	Late		IV	G4	Chemotherapy,Radiation,Biopsy,Surgery
HP-82493	Adenocarcinoma	Late		III	G3	Radiation,Biopsy,Surgery
HP-82495	Adenocarcinoma	Late		III	G3	Radiation,Biopsy,Surgery
HP-82496	Adenocarcinoma	Late		III		Biopsy,Surgery
HP-82723	Adenocarcinoma	Late		pT3a_N0_MX(III)	G9	Micardis, Triamterene
HP-82728	Adenocarcinoma	Late		pT3a_N0_MX_R0(III)	G9	Neomycin-Polymyxin Suspension
HP-82731	Adenocarcinoma	Late		pT3a_N0_MX_R0(III)	G7	Altace, Ambien, Glucovance, Prilosec
HP-82732	Adenocarcinoma	Late		pT3a_N0_MX_R0(III)	G7	Amiodarone, Armour Thyroid, Aspirin, Cipro, Effexor, Flagyl, Lanoxin, Lisinopril, Oxycodone, Paxil, Toprol, Verapamil, Xanax
HP-82736	Adenocarcinoma	Late		pT3a_N0_MX(III)	G7	Robinul
HP-82737	Adenocarcinoma	Late		pT3a_N0_MX_R0(III)	G7	Gentamicin, Potassium Chloride
HP-82739	Adenocarcinoma	Late		pT3a_N0_MX_R0(III)	G7	Allegra, Aspirin, Cardizem, Co Q, Lisinopril, Lopressor, Mucinex, Multivitamin, Plavix, Vitamin B, Zocor
HP-82746	Adenocarcinoma	Late		pT3a_N0_MX_R0(III)	G7	Reglan
HP-82748	Adenocarcinoma	Late		pT3a_N0_MX_R1(III)	G7	None
HP-82749	Adenocarcinoma	Late		pT3a_N0_MX_R1(III)	G7	Actos, Amaryl, Metformin, Prinivil, Zocor
HP-82757	Adenocarcinoma	Late		pT3a_N0_MX_R0(III)	G9	Altace, Amlodipine, Benadryl, Ecotrin, Fish Oil, Flomax, Glimepiride, Hydrochlorothiazide, Lutein, Metformin, Nasonex, Plavix, Tylenol, Vitamin B12, Vitamin D, Warfarin, Zocor
HP-82759	Adenocarcinoma	Late		pT3a_N0_MX_R0(III)	G7	No Medication Found
HP-82769	Adenocarcinoma	Late		pT3a_N0_MX_R0(III)	G6	Acyclovir, Serax, Viagra
HP-82772	Adenocarcinoma	Late		pT3a_pN0(III)	G7	Clonidine, Lotrel
HP-82775	Adenocarcinoma	Late		pT3b_N0_MX_R0(III)	G9	Accuretic, Aspirin, Caduet, Diet Aid, Keflex, Singulair
HP-82778	Adenocarcinoma	Late		pT4_N0_MX_R1(IV)	G9	Atenolol, Rosuvastatin, Vytorin, Xanax
HP-82779	Adenocarcinoma	Late		pT4_N0_MX_R0(IV)	G8	Prilosec
HP-82781	Adenocarcinoma	Late		pT4_N0_MX_R0(IV)	G7	None
HP-82784	Adenocarcinoma	Late		pT4_N0_MX_R0(IV)	G7	Aspirin, Avandamet, Coreg, Gaviscon, Glipizide, Lipitor, Lotrel, Omacor, Plavix
HP-82786	Adenocarcinoma	Late		pT4_N0_MX_R0(IV)	G6	Fiber, Zocor
HP-82787	Adenocarcinoma	Late		pT4_N0_MX(IV)	G7	Aspirin, Clonodine, Coreg, Crestor, Dyazide, Etodolac, Lasix, Pataday, Potassium, Plavix, Protonix, Simvastatin, Toprol XL, Tylenol, Zolpidem
HP-82788	Adenocarcinoma	Late		pT4_N0_MX_R1(IV)	G9	None
HP-82790	Adenocarcinoma	Late		pT4_N0_MX_R1(IV)	G6	Crestor, Lexapro
HP-82793	Adenocarcinoma	Late		pT4_N0_MX_R0(IV)	G6	Advicor
HP-82794	Adenocarcinoma	Late		pT4_N0_MX(IV)	G6	Furosemide, Lorazepam
HP-82795	Adenocarcinoma	Late		pT4_N0_MX(IV)	G9	None
HP-82796	Adenocarcinoma	Late		pT4_N0_MX_R0(IV)		Cipro, Iron, Nitroglycerin, Proscar
HP-82799	Adenocarcinoma	Late		pT4_N0_MX_R1(IV)	G9	Albuterol, Casodex, Colace, Ditropan, Flonase, Levobunolol, Multivitamin, Namenda, Norvasc, Ziac, Zoloft
HP-82802	Adenocarcinoma	Late		pT4_N0_MX_R1(IV)	G8	Glucophage XR, Lotrel, Micardis
HP-82804	Adenocarcinoma	Late		pT4_N0_MX(IV)	G7	Verapamil
HP-82809	Adenocarcinoma	Late		pT4_N0_MX_R1(IV)	G6	Diovan, Lipitor
HP-82812	Adenocarcinoma	Late		pT4_N0_MX_R1(IV)	G7	Actos, Aspirin, Fish Oil, Lipitor, Lisinopril, Metanx, Niacin, Toprol XL
HP-82814	Adenocarcinoma	Late		pT4_N0_MX_R1(IV)	G9	Flonase, Hyzaar
HP-82815	Adenocarcinoma	Late		pT4_N0_MX_R1(IV)	G9	Lisinopril, Nexium
HP-82816	Adenocarcinoma	Late		pT4, pN0, pR1(IV)	G8	None
HP-82817	Adenocarcinoma	Late		pT4_N0_MX_R1(IV)	G8	Advil, Casodex, Exforge
HP-82820	Adenocarcinoma	Late		pT4_pN0_pMX(IV)	G7	Aldactone, Allopurinol, Centrum, Coumadin, Cozaar, Digoxin, Gabapentin, Glipizide, Lasix, Lovenox, Glucosamine, Zocor
HP-82823	Adenocarcinoma	Late		pT4_pN0_pMX(IV)	G6	Aspirin, Benicar, Lexapro, Lipitor, Magnesium, Nasonex, Ziac
HP-82824	Adenocarcinoma	Late		pT4_pN0(IV)	G8	Flomax, Zestril
HP-82827	Adenocarcinoma	Late		pT4_pN0_pMX_R1(IV)	G9	None
HP-82828	Adenocarcinoma	Late		pT4_pN0_pMX(IV)	G7	Aspirin, Atenolol, Byetta, Lipitor, Lisinopril, Meloxicam, Metformin
HP-82829	Adenocarcinoma	Late		pT4_pN0_pMX(IV)	G9	Amlodipine, Aspirin, Coumadin, Digoxin, Diovan, Fosinopril, Hydrochlorothiazide, Labetalol, Simvastatin, Taztia XT
HP-82831	Adenocarcinoma	Late		T3b_N1_M0(IV)	G7
HP-82833	Adenocarcinoma	Late		T3a_N0_M0(III)	G7
HP-82835	Adenocarcinoma	Late		T3b_N0_M0(III)	G7
HP-82836	Adenocarcinoma	Late		T3b_N0_M0(III)	G8
HP-82837	Adenocarcinoma	Late		T3b_N1_M0(IV)	G7
HP-82838	Adenocarcinoma	Late		T3a_N0_M0(III)	G9
HP-82840	Adenocarcinoma	Late		T3b_N0_M0(III)	G7
HP-82842	Adenocarcinoma	Late		T3a_N0_M0(III)	G8
HP-82844	Adenocarcinoma	Late		T3b_N0_M0(III)	G6
HP-82845	Adenocarcinoma	Late		T3a_N0_M0(III)	G7
HP-82848	Adenocarcinoma	Late		T3b_N0_M0(III)	G7
HP-82849	Adenocarcinoma	Late		T3b_N1_M0(IV)	G7
HP-82852	Adenocarcinoma	Late		T3b_N1_M0(IV)	G7
HP-82853	Adenocarcinoma	Late		T3a_N1_M0(IV)	G7
HP-82856	Adenocarcinoma	Late		T3b_N1_M0(IV)	G9
HP-82857	Adenocarcinoma	Late		T3b_N1_M0(IV)	G7
HP-82858	Adenocarcinoma	Late		T3b_N0_M0(III)	G7
HP-82860	Adenocarcinoma	Late		T3a_N0_M0(III)	G9
HP-82861	Adenocarcinoma	Late		T3b_N0_M0(III)	G7
HP-82863	Adenocarcinoma	Late		T3b_N0_M0(III)	G7
HP-82864	Adenocarcinoma	Late		T3b_N0_M0(III)	G7
HP-82865	Adenocarcinoma	Late		T3b_N1_M0(IV)	G9
HP-82866	Adenocarcinoma	Late		T3b_N1_M0(IV)	G8
HP-82867	Adenocarcinoma	Late		T3b_N0_M0(III)	G7
HP-82869	Adenocarcinoma	Late		T3a_N0_M0(III)	G8
HP-82870	Adenocarcinoma	Late		T3b_N0_M0(III)	G7
HP-82871	Adenocarcinoma	Late		T3b_N0_M0(III)	G8
HP-82872	Adenocarcinoma	Late		T3b_N1_M0(IV)	G10
HP-82873	Adenocarcinoma	Late		T3b_N0_M0(III)	G6
HP-82876	Adenocarcinoma	Late		T3b_N0_M0(III)	G9
HP-82877	Adenocarcinoma	Late		T3a_N1_M0(IV)	G7
HP-82878	Adenocarcinoma	Late		T3b_N0_M0(III)	G6
HP-82880	Adenocarcinoma	Late		T3b_N0_M0(III)
HP-82882	Adenocarcinoma	Late		T3b_N1_M0(IV)	G10
HP-82883	Adenocarcinoma	Late		T3b_N1_M0(IV)	G7
HP-82884	Adenocarcinoma	Late		T3b_N1_M0(IV)	G7
HP-82886	Adenocarcinoma	Late		T3b_N0_M0(III)	G7
HP-82887	Adenocarcinoma	Late		T3b_N1_M0(IV)	G7
HP-82889	Adenocarcinoma	Late		T3a_N0_M0(III)	G7
HP-82890	Adenocarcinoma	Late		T3a_N1_M0(IV)	G9
HP-82891	Adenocarcinoma	Late		T3b_N0_M0(III)	G7
HP-82892	Adenocarcinoma	Late		T3a_N1_M0(IV)	G9
HP-82893	Adenocarcinoma	Late		T3b_N0_M0(III)	G7
HP-104135	Carcinoma	Met	Urinary Bladder	T4_N1_MX(IV)	G10
HP-104527	Adenocarcinoma	Met	Bone
HP-50495	Adenocarcinoma	Met	Bone
HP-55659	Carcinoma	Met	Bone Marrow	TxNxM1(IV)		Surgury - Bilateral Orchiectomy
HP-55664	Carcinoma	Met	Bone Marrow	TxNxM1(IV)	G3	Lupron
HP-55668	Adenocarcinoma	Met	Bone Marrow	TxNxM1(IV)	G3	Lupron
HP-55669	Adenocarcinoma	Met	Bone	TxNxM1(IV)	G3	Lupron
HP-81356	Adenocarcinoma	Met	Lymph Node
HP-82298	Adenocarcinoma	Met	Lymph Node	(IV)		Aspirin
HP-82299	Adenocarcinoma	Met	Urinary Bladder	(IV)		Proscar, Nexium
HP-82301	Adenocarcinoma	Met	Lung	(IV)		Aspirin, Lipitor
HP-82895	Adenocarcinoma	Met	Lymph Node	T3b_N1_M0(IV)	G8
HP-82896	Adenocarcinoma	Met	Lymph Node	T3b_N1_M0(IV)	G9
HP-82897	Adenocarcinoma	Met	Lymph Node	T3a_N1_M0(IV)
HP-82899	Adenocarcinoma	Met	Lymph Node	T3a_N1_M0(IV)	G7

## Sheet: S-Table2
	Analysis	Figures	Excluded samples	# Failed samples	Total # samples analyzed
	RNASeq	1c and 2c	9 BPH samples	30	150
	H&E	2b		5	180
	Pan-CK-AR	1b		5	180
	PDL-1 (SP142)	2c		5	180
	Fusion burden	supplementary fig 1a-1c; figures 1c and 2a	9 BPH samples	30	150
	Tumor mutation burden	supplementary fig 1a-1c; figures 1c and 2a	9 BPH samples	30	150
	CRPC score	supplementary fig 1a-1c; figures 1c and 2a	9 BPH samples	30	150

## Sheet: S-Table3
HP number	ERG	stage	mutation load	TMB (mutation load per MB)	Fusion count	TFB (fusions/10,000 genes)	CRPC score	SPINK1	Triple Neg (ERG-/ETS-/SPINK1-)	Cell Cycle progression	ERG2	ETS	MAPK	AR signature	PI3K signature	Immune suppressors	B cells	NK cells	Class-I Antigen processing	IFNg induced	M1	Treg	M2	MDSCs	APC Checkpoint inhibitors	T-effector	T cells checkpoint inhibitors	Activated stroma	EMT	NEPC gene classifier (70 genes) Misha NEPC signature
HP-106388	positive	Early/Intermediate	27	0.1713	39	17.33	-0.555614	0.0249275	-0.0132683	-0.397043	-0.0540218	0.475067	0.408247	-0.902391	0.178277	-1.14527	0.593096	-0.516405	0.00795839	-0.789784	-0.329424	0.484383	0.671901	1.00089	0.280677	0.250022	0.587039	0.233995	0.0227179	0.654176
HP-63199	positive	Early/Intermediate	56	0.3553	12	5.9	3.02354	0.731757	0.740466	-0.626413	0.7117	0.52439	0.702198	0.774338	1.07776	-0.445445	0.348699	-0.423488	0.669012	-1.09419	-0.201825	0.188104	-0.356375	0.364814	0.0651301	-0.101339	0.462328	0.0388091	0.388555	0.0270248
HP-63201	positive	Early/Intermediate	100	0.6344	5	2.54	0.333682	-0.23876	-0.568013	-0.659024	0.738162	-0.142769	0.615232	-0.121357	-0.982274	-0.819196	1.10133	-0.387693	0.791339	1.07584	1.23802	0.391353	0.236551	0.543388	0.507624	1.06016	0.55311	0.239955	0.689778	-0.760142
HP-63202	negative	Early/Intermediate	42	0.2665	31	15.74	4.88225	1.51261	1.0245	0.16956	-0.465802	1.58068	0.429211	1.2317	1.13249	0.424863	0.442598	0.698373	0.229812	0.674781	0.516628	-0.0844439	0.617471	0.081619	0.266964	0.874767	0.66773	0.437741	-0.0986339	-0.166243
HP-63204	negative	Early/Intermediate	31	0.1967	32	16.21	6.45607	1.67299	1.78783	-0.399689	-0.852953	0.504435	0.257516	1.37927	2.11306	-0.329561	0.985842	-1.61584	0.62581	0.123989	0.326383	0.176582	0.966432	0.383774	0.624633	0.96612	0.842584	-0.844766	0.439751	-0.67249
HP-63205	negative	Early/Intermediate	59	0.3743	16	8.29	2.30679	-0.347538	-0.602129	1.66263	0.183731	-0.713734	0.980761	-1.29046	0.366099	-0.55902	0.420854	2.08771	0.534352	-0.620614	0.387584	0.524568	1.57159	0.307008	0.540854	-0.162944	1.11127	1.48344	2.01769	-0.0600679
HP-63208	positive	Early/Intermediate	31	0.1967	27	12.97	1.9638	0.601555	0.632599	-0.489127	0.54952	0.971174	0.421685	0.449629	0.920586	-0.40964	0.316267	0.752342	1.03688	0.623916	0.728806	0.503359	0.179156	0.105081	0.551015	0.635045	0.52973	0.0436327	0.436967	0.0836638
HP-63210	positive	Early/Intermediate	25	0.1586	25	11.91	3.28282	0.390548	0.471849	-0.490624	1.22248	1.62191	0.500623	0.523942	0.523462	-0.395323	0.0936208	0.706129	0.376629	0.60516	0.743505	0.0975207	0.256952	0.158324	0.755498	0.869327	0.392368	0.158628	0.288366	0.167887
HP-63211	negative	Early/Intermediate	57	0.3616	12	6.07	-0.547154	-0.760509	-1.22192	-0.378341	-0.245032	1.95048	0.792598	-0.354581	0.126438	-0.383417	-0.0534816	0.385147	0.191675	0.832708	0.905588	0.344012	0.935928	0.769105	0.831262	0.438925	0.751584	1.08121	1.00581	0.0424744
HP-64941	positive	Early/Intermediate	65	0.4124	15	7.67	3.38449	-1.16714	-1.29075	0.190333	1.27993	0.0829293	0.352113	0.868852	0.505441	-0.670155	0.862269	-0.514438	0.126089	0.716398	0.534088	0.219339	-0.245752	0.355506	0.461191	0.491263	0.53625	-0.0695244	0.475646	-0.329412
HP-64945	negative	Early/Intermediate	32	0.203	36	18.2	7.208	1.45198	2.0156	1.35178	-0.907331	0.819608	-1.23493	0.836142	-0.969389	-0.426426	-1.42297	-2.13012	-1.03216	0.0806982	-0.157031	0.17794	-0.505682	-1.25215	0.0391148	-0.49229	-1.15254	-1.12456	-0.786795	-1.48467
HP-64951	negative	Early/Intermediate	178	1.129	8	4.56	-0.94979	1.90851	1.24012	-1.92074	-1.4107	-1.82921	0.607054	0.24521	0.0401088	-0.787457	-0.319123	0.545732	-0.900592	-0.412346	-0.208551	0.386274	-0.0283217	-0.877381	0.645776	-2.36941	0.593478	0.0397981	-0.752849	-0.99064
HP-69716	negative	Early/Intermediate	172	1.091	5	2.92	-1.00211	0.336902	0.461644	-1.71842	0.224968	-1.5486	-1.44351	-0.0646565	0.602378	0.325459	-0.373607	1.27963	-0.640305	-0.36784	-0.591787	-1.69554	-0.738998	-0.337392	-0.156872	-1.26199	-0.457233	0.419533	-1.04081	-1.01642
HP-69733	negative	Early/Intermediate	136	0.8628	4	2.26	-4.1201	-0.63773	-0.528543	-2.00723	-0.608914	-0.273137	-0.318071	-0.972393	0.109727	-0.591301	-0.110757	1.91516	-0.599411	-2.2311	-2.36375	-1.61506	-1.55304	-0.755103	-0.926149	-1.31337	-1.17584	-1.85486	-0.205271	-0.380047
HP-69739	negative	Early/Intermediate	170	1.078	2	1.13	-0.183639	1.6391	1.32425	-0.542721	-0.774792	-0.187308	0.747053	0.51303	0.548602	-0.4523	-1.80826	-0.383099	-1.62823	-0.813788	-0.943776	-0.0317236	-1.70619	-1.04638	-1.45786	-1.77153	-0.677118	-1.39934	0.856237	-0.0872936
HP-69742	negative	Early/Intermediate	94	0.5963	2	1.27	-4.19448	-0.531507	-0.697105	-1.34254	-0.801099	0.335075	1.08187	-1.0447	0.455281	1.92306	-0.254715	1.15088	-2.43107	-1.76936	-1.85994	-1.15719	-0.476881	1.1077	-0.374839	-0.7527	-1.59659	-2.18758	0.136186	0.611406
HP-69744	positive	Early/Intermediate	166	1.053	11	5.86	1.46847	-0.0400804	0.29629	-0.784819	0.965702	-0.15277	-0.0754335	0.502034	0.643736	-0.673197	-0.572102	0.00201468	-0.623384	-0.229161	-0.814341	-2.12758	-0.948891	-1.62977	0.0481595	0.179982	-1.53088	-0.919391	-0.342589	-0.292528
HP-69745	negative	Early/Intermediate	163	1.034	6	3.51	1.46698	-0.578253	0.279535	-0.978201	-0.360039	1.07298	-1.12492	0.843678	0.31556	0.278811	-0.950786	-1.09872	0.0285678	0.39987	-0.357978	-0.0220653	0.0715038	-0.128774	-2.19722	-0.728539	-0.524372	-0.298334	-0.221256	-0.264022
HP-69746	positive	Early/Intermediate	184	1.167	7	4.04	1.50086	-1.51616	-2.19862	-0.794163	1.47481	0.460548	-1.74436	0.164785	0.119512	1.25739	-1.75815	-1.33059	-1.82017	-0.7795	-1.17796	-0.601611	-0.597106	-0.628625	-1.27469	-1.02881	-0.4336	-0.565587	-1.51849	-1.02963
HP-69747	negative	Early/Intermediate	195	1.237	1	0.58	1.01581	0.11704	-0.302216	-0.801207	1.0426	0.591784	-0.396075	0.306684	0.64395	-0.337417	-0.226177	-1.24827	-0.364653	-0.653066	-0.429525	-1.63799	0.335375	-0.76824	-1.31271	-1.99211	0.146377	-0.403022	-1.54078	0.104077
HP-69750	positive	Early/Intermediate	167	1.059	9	4.65	0.325943	0.380663	0.368356	-0.242687	0.622576	0.644419	0.378781	0.320011	0.496592	-0.0982052	-0.682663	-0.331983	-0.312747	-0.507045	-0.450422	0.602666	0.136846	0.488937	-0.993415	0.0069959	-0.362072	-0.573593	0.727966	-0.52549
HP-81398	negative	Early/Intermediate	52	0.3299	16	7.75	1.26395	1.05101	1.24397	0.039822	-0.86989	-0.087558	1.16599	0.396258	0.690573	0.0526318	0.700594	0.79065	-0.0226306	-0.77596	-0.399819	0.923987	-0.258618	0.765931	0.670895	0.613713	0.445439	0.780148	0.795593	0.131996
HP-82843	positive	Early/Intermediate	34	0.2157	19	9.15	5.47727	0.333789	0.699668	1.04226	1.07646	0.567186	0.419622	1.20419	1.42855	-0.611305	0.121016	0.647383	0.415267	0.0966342	0.385503	0.0876509	-0.573816	0.35388	-0.313166	0.163615	-0.327276	-0.150134	0.327	-0.66046
HP-82846	positive	Early/Intermediate	23	0.1459	42	20.12	4.39165	-0.0755295	-0.0524392	0.388481	0.989233	-0.0395778	0.867058	0.628892	0.824864	0.383258	0.955246	1.19391	0.60273	0.690827	0.991511	0.58375	0.691051	0.464843	0.618265	0.802382	0.865813	0.723714	0.634437	-0.166533
HP-82850	negative	Early/Intermediate	27	0.1713	25	12.88	7.89864	0.970737	2.25492	0.180139	0.0603727	0.17524	0.442833	1.69452	1.65629	-0.21193	-0.911332	0.330254	-0.0316066	-0.468309	-0.166288	-0.556401	1.4094	0.20961	-0.00348784	-0.0754241	-0.244774	-0.00255556	0.558123	-0.434163
HP-82854	positive	Early/Intermediate	48	0.3045	20	10.1	3.25015	1.63972	1.66162	-0.294629	-0.1588	0.0891329	-0.180776	0.965937	-0.466098	1.01409	0.244267	0.48036	0.395094	0.261489	0.208663	0.79429	0.243744	0.806174	0.694604	0.208099	0.853845	0.663981	-0.4395	-0.562322
HP-82859	negative	Early/Intermediate	92	0.5837	12	6.26	0.545546	-0.0883152	0.488877	0.0391766	-0.27167	1.84042	0.915081	0.152374	0.490801	-0.288629	-0.600107	0.643925	0.733697	1.15444	1.34754	0.557581	0.227966	1.00816	0.515525	1.47907	1.25001	0.723507	0.928782	0.0493213
HP-82862	positive	Early/Intermediate	91	0.5773	9	4.66	0.125642	-1.09709	-0.940243	-0.842333	0.829547	-0.88301	-0.00314101	-0.477053	0.814203	-1.10396	-0.156799	-1.1568	1.54487	1.1586	0.874676	-1.81904	-0.755682	0.427005	1.16683	0.909222	0.487825	0.594203	-0.834855	-0.400279
HP-82874	negative	Early/Intermediate	77	0.4885	12	6.06	1.36191	1.93364	1.56222	-0.505315	-0.728717	-0.173242	1.50227	0.473891	1.09193	1.39393	0.104442	-0.557013	0.292293	0.130412	0.401233	0.431506	-0.676927	0.158432	0.82356	0.327826	0.14786	0.0249938	0.818165	-0.0338881
HP-82881	negative	Early/Intermediate	120	0.7613	10	4.87	0.517254	1.00107	0.028766	-0.202682	-0.276197	0.102162	0.78664	0.289238	0.172641	-0.196869	-0.646188	-0.0108125	0.108991	0.359647	0.155779	0.50094	0.401675	-0.230729	0.617432	0.537075	0.627009	0.168969	0.517219	0.226714
HP-106386	positive	Late	25	0.1586	52	24.03	0.892373	0.876044	0.972605	0.265667	-0.779903	-0.992672	0.680212	-0.0100955	0.896742	-0.609441	0.678397	0.247868	0.127832	0.368511	0.553157	0.123036	1.00949	0.70712	0.585128	0.454505	0.629329	0.262008	0.90147	0.173934
HP-106387	positive	Late	44	0.2791	12	6.04	2.89894	-1.17249	-1.53627	0.315853	0.712518	0.193894	0.713502	-0.554113	0.763488	-0.411684	-0.215325	-0.845177	0.668873	0.691372	1.19405	0.987911	0.77937	0.866129	0.264489	1.42043	0.695545	0.935235	1.10316	-0.649244
HP-106389	positive	Late	24	0.1523	43	19.77	3.78537	-1.31039	-0.951872	0.771983	0.708537	0.627289	0.414815	-0.169336	1.2056	-0.564586	-0.953404	0.648219	0.601706	0.420926	0.740545	0.64478	0.710625	0.779477	0.149175	0.120165	0.703787	0.709262	0.31395	-0.343449
HP-50619	positive	Late	142	0.9009	14	7.06	-1.77196	-1.43561	-1.7449	1.70709	-0.529533	0.996689	0.830599	-0.985804	-1.95009	-0.895685	0.079034	1.60094	-0.109918	-2.09487	-1.72769	0.543647	-0.825674	-0.201499	-0.460822	0.292659	0.0834757	-0.481103	0.0535608	-0.723227
HP-50621	negative	Late	49	0.3109	10	4.52	-9.85403	-1.51134	-0.880273	-0.925643	-1.18173	1.15497	-0.853629	-0.203816	-2.2241	-1.23146	0.678843	0.241639	-0.994281	-1.1469	-0.212653	-0.496965	-1.70548	-1.31524	-1.77454	-1.72614	-2.43678	-1.88552	-2.89155	-0.279987
HP-50623	negative	Late	77	0.4885	1	0.76	-5.19015	0.0293336	0.108693	-0.807709	-1.02323	-1.09076	-1.93565	-0.622843	-2.54977	-1.1874	-1.27367	-2.12157	-1.1439	-1.34312	-1.56968	0.163073	-1.31012	-2.29759	-0.656274	-1.72614	-1.44339	-1.27035	0.0574219	0.201007
HP-70352	negative	Late	66	0.4187	0	0	-8.54016	-1.47264	-1.82947	-1.57964	0.129579	-2.74426	-2.59068	-0.765369	0.56931	0.0200818	0.252414	0.173693	-1.08259	-0.55082	-1.17136	-1.184	-0.100264	-2.36841	-1.6663	-1.37418	-1.51023	0.459759	-2.76628	-0.236981
HP-70353	negative	Late	76	0.4822	1	0.86	-3.78546	-1.11259	-1.70573	-1.25654	0.0486337	-1.18755	-1.36942	-0.459619	0.243512	0.208387	0.168993	-0.725001	-2.48497	-0.348201	-0.690962	-1.24195	-1.59981	-0.823952	-0.366684	-1.19727	-0.903075	0.296702	0.117775	-0.212767
HP-70354	positive	Late	26	0.1649	30	14.25	3.29866	-0.0251759	0.125572	0.692437	0.870816	0.411103	0.720263	0.55526	0.0505504	-0.656497	0.581007	0.442101	0.68443	0.950208	1.12255	-0.0597819	0.995852	0.535593	0.896688	0.446316	0.672734	1.47142	1.27562	0.28877
HP-70355	negative	Late	44	0.2791	21	10.56	0.586319	-0.0434364	0.299292	0.124612	-0.471673	1.80284	0.287715	0.246897	-0.53733	-0.740716	-1.08856	0.601581	0.157594	-0.0401413	0.327268	0.643196	0.842332	0.856225	0.626652	-0.142659	0.32493	1.7329	1.40702	0.121552
HP-70356	negative	Late	38	0.2411	21	10.77	0.212344	0.00603136	-0.0727454	-0.305236	-0.341096	1.07797	1.13681	-0.140494	0.2812	0.579412	0.497966	0.972084	0.873707	0.419541	1.04989	0.954643	1.35767	1.01984	1.22243	0.645502	0.845597	0.978794	1.52569	0.612181
HP-80761	negative	Late	120	0.7613	1	0.64	-3.92241	-0.228741	-1.22053	-1.08038	0.652524	0.474806	-0.741555	-0.71706	-0.65471	-0.660753	2.21246	-0.790572	0.147804	1.46029	0.300695	2.12118	-0.871739	-2.01543	-1.07782	0.640634	0.188435	0.0952783	-0.73329	-0.321919
HP-80766	negative	Late	47	0.2982	35	17.33	3.84535	1.37285	0.879801	1.30422	-0.179809	0.385684	0.140692	0.410997	0.0760696	-0.540275	1.72943	1.02694	1.8457	2.22195	1.94534	1.42991	0.969922	0.210878	1.52428	1.98335	1.61958	0.333947	0.333666	-0.384866
HP-81353	positive	Late	54	0.3426	29	14.1	4.07202	-0.135956	-0.683827	0.334092	1.26154	1.0314	-0.0803221	0.636654	-0.11755	-0.669692	-0.511621	-0.121192	0.105898	0.548294	0.52458	-0.0533073	0.924439	0.23686	0.0170573	0.111945	-0.0304735	0.200976	0.319535	-0.462348
HP-81355	negative	Late	86	0.5456	13	6.48	-0.694195	0.198072	0.0340351	-0.79158	-0.621356	-0.520647	1.10264	-0.928786	0.378126	-1.06131	-0.464969	0.308054	-1.00721	-1.50831	-0.882486	0.38394	-0.387159	0.122858	0.206669	-1.24126	-1.78712	-0.0950608	0.803845	0.773277
HP-81357	negative	Late	65	0.4124	14	7.53	3.18632	-0.194817	0.855812	-0.23995	0.380414	3.08663	-0.715233	1.18116	-0.221892	-0.729795	0.119921	-0.25416	-0.746888	0.0449055	-0.160368	0.0331082	-0.309351	-1.12677	-0.934437	0.26269	-0.36483	-1.26031	0.48939	-0.918051
HP-81359	positive	Late	167	1.059	14	7.28	1.90509	-0.370412	-0.655153	0.115345	1.01091	0.66386	-0.163953	-0.117872	0.893764	-0.57401	0.16152	-0.677154	-0.50232	0.824335	0.71322	0.0381185	-0.513087	-0.708002	0.580936	-0.664225	0.272259	0.0471032	-0.0389378	-0.578523
HP-81366	negative	Late	33	0.2094	22	10.68	4.32421	2.15109	0.984161	0.617015	-0.797874	0.341267	0.782167	1.02148	1.10404	-0.605447	0.240998	-0.532435	0.278132	0.790316	1.04183	0.594847	0.58119	0.533523	0.595984	0.396799	1.02897	1.01401	0.367942	-0.406358
HP-81367	positive	Late	42	0.2665	31	15.85	5.68113	-0.692652	-0.442835	0.272411	1.5362	2.00707	-0.573089	1.04743	-0.241244	-0.435915	-1.48945	-0.315246	1.02306	1.17301	0.971521	0.252472	-0.113044	-0.03829	0.423525	0.0914709	0.476951	-0.249352	-0.126378	-0.866721
HP-81369	negative	Late	167	1.059	13	6.49	0.924684	0.129252	-0.281656	-0.497696	-0.997764	-0.13183	0.16973	0.468162	0.526145	-0.781465	0.144984	-1.31232	-0.253424	0.0376556	-0.756415	-0.59987	-0.397418	0.536459	0.135308	-0.053325	0.486922	-0.240998	-1.40253	0.15644
HP-81370	positive	Late	137	0.8691	13	6.7	1.63994	-0.753165	-0.326284	-0.907846	1.02193	1.17332	0.377711	0.132975	0.0530832	0.239021	-1.09074	-1.41098	-0.158928	-0.238583	-0.142085	0.423401	-0.169778	-0.0974983	0.227627	-0.587714	-0.613171	0.38435	0.315563	-0.337537
HP-81382	negative	Late	103	0.6534	16	7.88	2.57102	1.78643	1.06891	0.327076	-0.27562	0.593967	0.355018	0.374561	0.237265	-0.924973	-0.417562	-0.624347	-0.322593	-0.139962	-0.114936	-0.109953	-0.0680315	-0.315256	0.155062	0.116502	-0.122302	-0.083737	0.637004	-0.609975
HP-81384	negative	Late	163	1.034	7	3.79	2.54803	2.30472	1.70329	-0.197743	-1.2751	0.258814	-1.12547	1.08151	0.419073	-0.667235	-1.44144	-1.25172	-2.10382	-2.45723	-1.97934	0.419297	-1.21133	-0.599919	-1.03898	-1.85303	-1.42587	-0.574244	-1.47391	-0.657414
HP-81385	positive	Late	66	0.4187	10	5.22	-5.90246	-1.13865	-0.403879	-0.341435	-0.913812	-1.03905	0.986629	-1.67615	1.12522	-0.181359	1.09371	0.148567	1.02378	1.31562	1.52811	1.8652	1.39843	0.850184	0.631016	1.87294	2.1916	1.63888	0.579773	0.724369
HP-81387	positive	Late	74	0.4695	16	8.03	1.65988	-0.294126	0.0263508	-0.280322	0.999128	0.386808	0.639981	0.202074	0.22511	-0.524762	0.134338	0.236238	-0.357269	0.257832	0.244387	0.764729	0.186736	0.259961	-0.222335	-0.761825	0.451936	0.45317	0.384057	-0.494989
HP-81388	positive	Late	81	0.5139	14	7.21	2.50994	-0.948125	-0.406563	0.855288	1.18384	0.065647	-0.590133	0.109944	0.486367	-0.271963	0.789949	-0.321819	-0.735052	0.322528	0.133417	0.605238	-0.579213	-0.473355	0.000712804	-0.26475	0.724742	0.0298546	0.52242	-0.766566
HP-81391	positive	Late	156	0.9897	3	1.65	1.26541	-0.600398	-0.0828294	-0.73341	0.701885	0.226023	0.335381	0.165106	0.197596	-0.0153927	-1.73223	-1.11498	0.36163	-0.554093	-0.851897	-0.179059	-0.212654	-0.578763	-1.32411	-1.89307	-1.75447	-0.285089	0.477294	-0.305425
HP-81393	positive	Late	133	0.8438	8	4.55	1.88375	-1.01522	-1.90264	-0.763134	1.44223	0.4709	-0.191783	0.671475	0.759401	-0.309228	-1.06622	0.520215	-1.19607	-1.07188	-0.758223	0.130841	-0.763052	-1.01198	-1.85727	-1.64325	-0.446554	-1.23417	0.0676928	-0.788993
HP-81395	positive	Late	149	0.9453	4	2.31	-2.47203	-1.06288	-0.69859	-1.78263	0.783026	-0.34011	-1.19725	-0.18748	0.54856	-0.30097	0.328939	-1.00389	-1.66613	-0.57245	-0.778373	0.354429	-2.11309	-2.27914	-2.20812	-2.03671	-0.280294	-1.1165	-1.3617	-0.537025
HP-82476	negative	Late	65	0.4124	2	2.02	-4.16972	0.164219	-0.109119	1.26934	0.702716	-0.728954	0.370382	-0.246563	-1.14056	-3.93867	3.3487	-2.01066	-0.0845068	-0.65947	-0.100264	-2.21404	-1.1536	-0.468656	-1.7854	1.1827	1.41122	-0.994245	-1.82259	-0.20753
HP-82479	negative	Late	31	0.1967	29	14.04	4.45481	1.43123	1.48247	0.499588	-0.689589	-0.48475	0.505553	0.813561	-0.0637764	0.557879	0.0407601	0.204574	0.860842	0.14675	0.488802	0.389463	1.0543	0.696676	0.342925	0.744327	0.653585	0.614263	0.686511	-0.268398
HP-82482	negative	Late	41	0.2601	27	11.91	4.39983	2.75964	2.13293	0.350924	-0.246485	0.199641	0.0208895	1.0595	-0.855985	1.9068	-0.813455	1.04232	0.210714	1.10331	0.803886	-0.205263	-0.591459	0.502532	0.7745	0.367659	0.419045	-0.53683	-0.542087	0.988163
HP-82483	positive	Late	38	0.2411	15	7.76	5.85169	-0.793113	0.181327	0.135121	1.60488	-0.332065	-0.412986	0.83682	-0.255934	-0.560808	-0.605772	-0.15195	1.02672	0.622089	0.535697	0.24224	0.284199	0.119885	-0.215816	0.483398	-1.01851	0.448363	0.426945	-1.34089
HP-82486	positive	Late	26	0.1649	70	33.98	5.88041	0.262837	0.11989	0.281502	0.943185	1.46599	-0.189573	1.24653	-1.04535	-0.354333	-0.292037	0.453754	1.91552	1.54578	1.47773	0.627901	0.224594	0.665096	0.707355	0.709511	0.873085	0.755538	0.138863	-0.483167
HP-82491	negative	Late	88	0.5583	14	6.76	2.14655	2.18065	2.06367	0.846605	-0.637071	-0.309171	0.299546	0.812956	1.32663	2.15159	0.0121777	-0.507612	-0.188184	-2.03706	-1.79091	0.780347	0.060923	0.278828	0.917022	-0.364059	-0.759321	0.479203	1.35548	0.835671
HP-82492	negative	Late	84	0.5329	12	8.41	-4.53007	-0.9421	-0.934722	0.257573	-0.42288	-0.613454	0.141025	-2.13297	-2.2553	-0.0338551	0.684401	1.03178	0.778498	-0.196373	-0.271739	-0.400856	0.343846	1.77334	0.641745	-0.976828	-1.8392	-0.998898	0.745311	-2.32883
HP-82494	negative	Late	61	0.387	21	14.54	-7.59347	-0.274824	-1.34273	0.631241	-0.266365	0.872015	1.28665	0.0847968	0.220171	0.801345	3.22531	0.174708	1.18042	-0.977211	0.109241	-2.71251	-1.36802	0.809505	0.894318	-1.72614	-1.01368	0.280633	-1.47156	-0.209099
HP-82495	negative	Late	90	0.571	4	3.05	-1.0586	-1.73768	-0.694595	-0.953674	0.907587	-1.49827	-2.5253	-0.312355	-0.561295	1.3973	-1.20854	-1.69311	-0.46813	-1.09782	-0.935641	-2.41993	-2.09986	-1.76965	-1.73229	-1.45486	-1.66738	-2.96525	-1.82722	-0.0393079
HP-82496	positive	Late	68	0.4314	25	12.93	2.49464	-0.796656	-0.642983	-1.33487	1.6071	0.53007	-1.17711	0.941118	-0.524704	-1.08713	-2.22178	-1.03892	0.253613	0.285887	0.399644	-0.411711	-0.55458	-0.0246281	-0.249656	-0.30801	-0.363038	0.526546	-0.193368	-0.500815
HP-82723	negative	Late	34	0.2157	20	9.45	-0.122129	-0.0134218	-0.0899571	-0.735082	-0.613808	1.22974	1.06047	-0.0684617	0.741345	-0.645233	0.384525	0.386299	1.3229	0.83765	1.00651	1.19914	1.2163	1.08845	0.648069	1.17792	1.15826	0.885715	1.00578	-0.178322
HP-82732	negative	Late	43	0.2728	20	9.6	3.85761	1.16222	0.976347	0.544076	-0.151112	0.409367	0.791925	0.5572	0.383202	-0.445353	0.41702	0.755665	0.0353879	-0.657685	0.3125	-0.109169	1.12078	0.940098	0.774892	0.532917	0.60596	0.031856	1.06762	-0.154807
HP-82736	positive	Late	89	0.5646	2	1.19	-1.21644	-0.620457	0.670006	-1.02073	0.606338	-0.887501	-1.38232	-0.291921	0.00630712	1.13328	-0.508279	0.18219	1.11323	-0.415919	-0.642396	0.479097	-1.10111	0.569796	-2.00815	-0.799149	0.810776	-0.362189	-2.21734	0.796929
HP-82737	negative	Late	64	0.406	16	7.78	3.7115	-0.226806	0.166755	-0.0959009	0.456737	1.57184	0.251955	0.630047	0.625339	-0.482876	0.8186	0.342819	0.642762	0.653558	0.593319	1.1389	0.542607	0.122033	0.278886	0.493134	0.674543	0.720794	0.905989	-0.525941
HP-82739	positive	Late	30	0.1903	48	23.4	5.66183	-0.436445	-0.483086	0.757068	1.70844	-0.165142	-0.310017	0.730463	0.185859	-0.440795	-0.177998	0.511523	-0.287032	0.534563	0.808528	0.542441	0.815635	0.284999	0.566847	0.37838	0.0866629	-0.0999063	0.386812	-0.634021
HP-82746	negative	Late	116	0.7359	2	1.09	2.0384	1.79209	2.01423	-0.986214	-1.27014	-0.173515	-0.456753	0.624705	1.08901	-1.01131	0.996734	0.236138	0.564567	0.863567	0.69064	-2.21087	0.386114	0.724371	0.831591	0.416287	-0.806695	0.177968	-0.467812	-1.05373
HP-82748	negative	Late	85	0.5392	15	7.5	2.27863	-0.730656	-0.529406	-0.353644	0.961691	-0.0509854	0.817697	0.14771	0.214286	-0.506771	0.106954	0.258924	0.459518	0.528906	0.767478	0.127158	0.8936	0.664416	0.887195	0.590907	0.564274	0.385504	0.897807	-0.166297
HP-82749	negative	Late	144	0.9136	1	0.49	1.57115	-0.25689	-0.186415	-0.137055	0.662859	-0.13007	0.636567	-0.0479449	-0.0134058	-0.0701109	0.191015	-1.56067	0.205235	-1.3729	-0.539688	0.00189933	0.902444	0.943753	0.383124	0.0870763	0.245153	-0.012375	0.626907	-0.528369
HP-82757	positive	Late	30	0.1903	32	15.65	1.15629	0.0397769	-0.566867	-0.997463	0.517908	-0.247219	0.826929	-0.740281	0.0931195	-0.609836	0.255721	0.254905	0.95333	0.88071	1.2589	0.979126	1.66217	0.714994	1.1273	0.858122	1.07418	1.28426	1.4511	0.272617
HP-82759	negative	Late	158	1.002	6	3.71	-0.757143	-0.833137	-0.461968	-1.94628	0.908404	0.51735	-1.14568	0.0965277	-0.58242	0.547634	-1.68696	-1.13082	-1.24917	-1.25592	-1.77075	-2.33066	0.161651	-1.97907	-1.15795	-1.14271	-0.486682	-1.38381	-1.41172	-1.08204
HP-82772	negative	Late	74	0.4695	17	7.88	2.50202	0.567126	1.29619	0.311625	-0.684615	-1.38242	0.405991	0.159188	0.515555	1.14794	0.689369	-0.400918	0.5681	0.0922245	0.737186	0.632502	0.474645	0.790439	0.797128	0.793848	0.366367	0.877541	1.07095	0.201543
HP-82778	negative	Late	108	0.6852	3	1.62	3.23649	-0.0847645	-0.40716	1.46652	0.207777	-0.702101	-1.17863	-0.39683	-0.745671	-0.186799	-0.69831	-1.76475	-0.16784	-0.574657	-0.911344	0.895844	-0.370838	0.279176	-0.39348	-0.650033	-1.82678	1.55474	-0.0218957	-0.700715
HP-82779	positive	Late	32	0.203	26	13.04	5.66338	-0.109142	-0.0684297	0.0453042	1.41652	0.161488	0.467006	0.984985	0.204993	0.0709034	-0.245708	-0.503009	0.411271	0.404087	0.723694	0.048191	1.02731	0.397236	0.294007	0.329667	0.170484	0.66595	0.79719	-0.116104
HP-82784	negative	Late	85	0.5392	6	2.89	-0.316283	1.6365	0.738252	-0.578937	-0.776704	-0.00849307	0.655371	0.440765	0.479328	0.946798	-0.511907	1.07419	0.74072	0.565332	0.416332	0.0494736	0.970771	-0.365191	0.764449	0.872174	0.131425	0.169773	0.997874	0.085574
HP-82786	negative	Late	48	0.3045	20	9.36	4.58251	1.90235	1.7106	0.216108	-0.179565	0.879511	-0.175194	0.851531	0.481095	0.648981	0.466066	0.121555	0.0879095	-0.962512	-0.463904	0.00658049	-0.336859	0.376957	-0.143354	-1.06157	0.0117013	-1.01969	0.307133	-0.409666
HP-82787	negative	Late	106	0.6725	3	1.7	-0.776858	1.46798	1.44942	-0.686401	-0.74956	0.103101	0.764948	0.794834	0.8252	-0.73872	-0.0782101	-1.05551	-0.168915	0.580489	-0.0102882	-1.70928	-1.15502	-0.170047	-1.54107	-0.420285	-1.74631	-0.761947	0.0977059	-0.902667
HP-82788	negative	Late	105	0.6661	5	2.8	-4.77361	0.113104	0.281112	-1.15395	0.0052665	-0.832124	-0.927933	-0.984127	0.71347	0.522884	-1.62309	-1.60648	-0.348119	-2.18059	-1.60855	0.528956	0.0159118	1.36299	-2.19559	0.0807324	-1.04475	0.181565	-0.404987	0.802576
HP-82790	negative	Late	139	0.8818	9	4.21	-0.36822	-0.184509	0.245062	0.111589	-0.18686	-0.23074	1.28074	0.20966	0.547931	1.30275	0.500333	0.234766	0.0212334	-0.706382	-0.471832	-2.12362	0.144489	0.0185611	0.190553	-0.701289	-0.769822	-0.385362	0.435183	1.07159
HP-82793	negative	Late	133	0.8438	12	5.98	2.56427	-0.496312	-0.362732	-0.381912	1.04296	0.0695787	-0.34086	-0.129237	-1.07439	-1.0278	-0.837702	0.531992	-0.714847	-1.31552	-0.452079	-0.329104	0.151948	-0.10837	0.281485	-0.87765	-0.217687	-0.793259	-0.257369	-0.755844
HP-82795	negative	Late	58	0.368	20	8.94	1.05497	0.832479	0.9914	-0.461522	-0.722614	-0.276994	0.881807	0.602684	-0.0833935	0.953353	1.18356	0.714988	1.04304	0.184207	0.58081	0.233977	0.315879	0.912481	0.0808519	1.62995	0.367153	1.42419	0.760637	0.664243
HP-82796	negative	Late	89	0.5646	21	9.29	4.20506	0.0187285	0.272092	2.86729	-0.682364	0.793204	2.3413	-1.30142	-0.104132	-1.34352	-0.273372	0.758433	0.250641	-0.275426	0.0360548	-0.73371	1.43876	0.727052	0.350996	0.531359	-0.46318	0.885785	-0.595194	1.41865
HP-82799	negative	Late	32	0.203	32	14.71	6.6294	-0.281939	0.948346	2.11041	-0.708011	0.978309	-0.0321234	0.523337	0.0301546	-1.61021	0.445152	0.31558	0.681636	0.372365	0.39821	0.914502	0.12199	-0.114238	0.313261	0.416763	0.73165	0.843862	0.467731	0.354601
HP-82802	negative	Late	177	1.123	5	2.58	1.1091	0.455216	-0.384765	-1.59711	0.18198	0.71859	-0.415156	0.802515	0.281891	-1.11987	-0.296918	-1.60015	0.036132	-0.968893	-0.884912	0.977577	-0.360901	-0.536566	0.2919	-1.09101	0.868302	-0.409004	-1.84269	-0.248724
HP-82804	positive	Late	90	0.571	16	6.27	-1.35975	-0.051021	0.012154	1.26072	0.600513	0.553363	0.0669235	-0.44033	-1.62426	0.630556	0.548596	0.908065	0.565761	0.463511	0.678463	0.364016	0.793319	1.29428	0.891624	1.12656	0.677583	0.163186	0.378173	2.0187
HP-82809	negative	Late	122	0.774	2	1.03	0.391257	1.3858	1.89085	-1.00645	-1.83521	-2.44793	0.136442	0.486393	1.11402	0.343125	0.613155	-1.51744	-1.06829	-0.696095	-0.844378	0.372861	-0.40296	-0.665993	-2.54201	-1.43142	-0.301943	-1.20248	0.141036	-0.418329
HP-82814	negative	Late	156	0.9897	11	5.42	0.121195	-1.02289	-0.93026	0.711676	-0.425823	-1.11711	-0.409603	-1.12344	-1.83624	-0.726594	-0.483783	0.129971	1.64683	1.6521	1.45202	1.50316	0.443071	1.04349	1.46962	0.310922	0.189181	0.338058	-1.18069	0.13754
HP-82815	negative	Late	48	0.3045	43	19.64	3.40229	0.277956	0.122972	1.24869	-0.773521	0.07092	0.126149	0.246431	-1.34291	-0.465031	-0.86164	0.540874	-0.981446	-0.643195	-0.384686	-0.206866	-0.102672	0.264128	-0.0387032	-0.380798	0.186161	0.306739	-0.422935	0.381367
HP-82816	negative	Late	8	0.05075	12	6.71	-18.2676	0.437035	-0.164901	2.64626	-0.588873	0.0874915	0.650079	-4.80216	-3.95434	3.34853	1.75582	2.22469	-2.46465	0.751896	1.02183	-0.0526763	0.888822	2.2995	2.09143	1.87308	1.85638	-0.444119	0.335297	5.24006
HP-82817	negative	Late	2	0.01269	1	3.56	-28.3014	-0.0165019	-0.794264	1.71352	-1.35052	-1.03498	-1.33502	-4.92407	-3.70911	4.20782	0.574069	0.88425	-3.59496	-0.126318	0.145666	0.681734	0.0635197	1.04015	1.68243	2.36672	1.77641	-2.0142	-0.323967	5.10222
HP-82820	negative	Late	99	0.6281	18	7.04	-5.78616	0.528755	-0.119757	1.73333	0.179475	0.279538	0.556034	-1.41803	-0.725093	2.78172	0.460156	2.14485	-0.793231	0.991342	0.740895	-1.54473	0.897654	1.80933	0.947065	0.107601	1.45014	-0.24749	0.291132	3.62672
HP-82823	negative	Late	64	0.406	12	5.53	-0.324212	0.681288	0.971343	0.274588	-1.27338	-0.307968	0.359509	-0.14585	0.469791	-0.404931	1.16265	0.870587	1.00681	1.32852	1.24644	0.391382	0.955088	1.00909	1.26472	1.2629	1.3523	0.254449	0.84397	0.0294078
HP-82824	negative	Late	115	0.7296	22	10.15	2.37373	0.12616	0.923492	1.64831	-0.335985	-0.132585	0.313824	0.144193	-0.885779	-0.716601	0.982784	-1.70282	-1.06838	-1.66163	-0.896111	-0.224953	-0.579636	0.489496	-1.88892	-0.768452	-0.556716	-0.180823	-0.356527	0.369948
HP-82827	negative	Late	36	0.2284	22	11.3	6.00669	-0.2824	-0.578745	1.85115	-0.815828	-0.299726	-1.31021	1.25266	0.226867	-0.571615	-1.934	-1.84747	-2.26519	-1.60918	-1.7997	0.226641	-2.48689	-1.16832	-1.52189	-1.95317	-2.59004	-1.34549	-1.83982	-1.2181
HP-82828	positive	Late	117	0.7423	11	5.07	1.00216	-0.452126	-0.340838	-0.584908	0.818428	0.474049	-1.06357	-0.0444602	-0.841804	0.493105	0.698806	-0.537386	0.70414	0.91446	0.853902	0.673517	-0.412708	0.0845167	0.553889	-0.312033	1.04346	0.703302	-1.26661	-0.905901
HP-82829	negative	Late	41	0.2601	22	9.99	2.6766	0.835578	-0.241596	0.841881	-0.588078	0.144993	-0.525571	0.545897	-0.151852	0.703334	-0.894911	-0.741793	-1.18468	-1.26711	-0.829227	-0.636389	-0.0841213	0.961328	-0.591172	0.0749079	-0.327519	0.458508	-0.270534	0.520096
HP-82831	negative	Late	80	0.5075	21	11.68	0.259487	-0.586363	-1.02741	-0.141287	1.25541	0.42248	-0.246732	0.275893	-0.554972	0.728857	1.09652	1.28879	1.31854	2.50522	1.65018	-0.0996708	0.353353	0.197599	0.749499	1.01129	1.07027	0.346389	0.764305	-0.115748
HP-82833	negative	Late	17	0.1078	0	0	-34.4468	-0.534616	-1.20993	0.267929	-2.31229	-2.40605	-0.744251	-2.578	-2.31561	2.4617	0.612594	1.8773	-2.82993	-0.730634	-1.29284	0.117832	-2.20671	1.60272	-0.715667	0.281386	-0.409542	-3.99933	-1.81693	3.13556
HP-82835	positive	Late	21	0.1332	75	33.89	4.74481	0.691734	0.257026	1.22718	1.03779	0.282225	0.655104	0.73188	0.910121	-0.812982	0.499022	-0.334945	1.07078	1.25425	1.4466	0.204683	1.29822	0.5059	0.858343	1.23076	0.822457	1.23735	0.819809	-0.104526
HP-82836	positive	Late	49	0.3109	26	12.79	1.87994	-0.505599	-1.21032	1.25354	0.772635	-0.293444	0.84343	0.177326	0.836717	-0.576171	0.603981	1.41161	0.5347	1.64283	1.34116	0.891851	1.06106	0.487768	1.05404	0.837724	1.05775	1.15906	0.900453	0.541852
HP-82837	positive	Late	25	0.1586	53	25.43	6.25527	0.456854	-0.307207	0.937395	1.40938	-0.362226	-0.280137	0.673477	0.484812	-0.81696	1.13396	0.998038	0.733716	1.64967	1.60399	0.346196	0.41184	-0.520871	0.980717	1.34014	1.32338	0.142175	0.0648538	-0.396969
HP-82840	positive	Late	101	0.6408	20	11	3.43563	0.00324922	0.351307	0.083262	1.16288	-0.407523	0.463019	0.938575	0.327112	-0.481868	-0.87447	-0.0548189	-1.31722	-0.177161	-0.882195	0.458716	-0.760484	-0.528389	0.402051	0.40125	-1.22424	-0.467509	-0.204898	-0.265782
HP-82842	negative	Late	148	0.9389	13	6.89	2.01504	-0.528001	-1.31034	-0.433668	0.720827	1.17869	-0.865331	0.440316	0.0280946	0.00112038	-0.863716	0.0948393	0.0676588	0.58066	0.412392	-0.45978	-0.885729	-0.712822	-0.808326	-0.514165	-0.840503	0.46677	-0.400331	-1.02242
HP-82844	negative	Late	93	0.59	14	7.09	3.52517	1.00329	2.20869	-0.342824	-1.8645	-1.6449	-0.231746	1.39118	-0.248036	0.777108	-0.156213	-1.47677	-0.379406	-0.217458	-0.209754	0.509644	-0.620371	-0.229453	0.49765	-0.0659486	-0.39259	-0.123599	-0.138917	-1.34928
HP-82845	positive	Late	34	0.2157	26	12.49	2.9186	-0.527938	0.306499	0.673304	0.507557	-0.321747	0.359305	0.245662	-0.517134	-0.117956	-2.16565	1.16279	0.425986	0.484227	0.628087	0.54244	-0.00859511	0.512059	0.569394	0.530787	0.565243	0.539033	0.872587	-0.533823
HP-82848	negative	Late	22	0.1396	40	19.23	4.13807	2.52475	1.51793	-0.137762	-0.528956	0.324004	0.577117	1.10739	1.37834	-0.433501	1.43894	0.897226	2.87928	1.96265	1.80767	0.533008	0.699374	0.720508	1.57853	2.32018	1.12847	0.240441	0.623923	-0.488085
HP-82852	negative	Late	125	0.793	15	7.82	2.40799	0.254716	0.215105	-0.387361	1.33363	0.492951	-0.996307	0.51871	-0.656071	-0.865719	0.814133	0.900595	0.547967	0.464708	-0.045602	0.761937	-0.759315	-2.24797	0.447396	0.45919	-0.792852	-0.417576	0.872576	-0.721641
HP-82857	positive	Late	99	0.6281	12	6.46	3.19806	-0.289737	-0.37073	-1.32416	1.25577	0.147174	0.43231	0.0780118	1.13135	1.7031	0.686693	-0.570231	0.964964	1.54097	1.47682	-0.182848	-0.967372	0.267912	1.41103	0.653867	0.449697	-0.310563	0.725483	1.78066
HP-82858	positive	Late	65	0.4124	8	4.11	2.96087	-0.787497	-0.58543	0.0948442	0.844938	0.432833	0.240759	-0.120129	0.174035	-1.18964	-1.53249	-0.340331	0.276066	-0.362534	-0.745835	-0.168003	-0.298763	0.0145537	-0.720213	0.165338	-0.237662	0.515586	0.423237	0.214278
HP-82860	negative	Late	93	0.59	6	3.28	-0.350022	-0.47564	0.0689752	-0.0841975	-1.00972	-2.25186	0.850003	-0.637525	0.676952	-0.128434	-0.556175	-0.0836024	0.479829	-0.361308	-0.692175	0.715296	0.0714165	0.368831	-1.57722	0.547072	0.503074	1.64236	0.283927	-0.345823
HP-82861	positive	Late	81	0.5139	6	3.05	2.04551	-0.118483	0.0404115	0.173259	1.13418	0.380798	0.0291934	0.591952	0.39376	1.37491	1.06893	1.8805	1.06552	1.8044	1.28838	0.930046	0.356034	-0.160526	0.753808	1.67631	1.44219	0.171767	0.479046	-0.525833
HP-82863	negative	Late	110	0.6979	5	2.54	0.558986	1.67618	1.48004	-0.177267	-0.658842	0.600282	0.856582	0.267653	1.82771	-0.364502	-0.597667	-0.250217	0.278454	-0.387818	-0.136056	0.97698	0.0772488	-0.174791	1.01779	0.164202	0.688393	-0.315018	-1.58492	0.467451
HP-82864	positive	Late	24	0.1523	38	18.21	5.59573	-0.733878	0.156385	0.707268	1.45687	1.34465	-0.456911	0.774847	-0.479974	0.159479	-0.485233	0.364129	1.02598	1.07364	1.12052	0.598411	0.361221	0.443716	0.467727	0.157586	0.606688	0.322374	0.471823	0.0680862
HP-82865	positive	Late	103	0.6534	12	6.07	4.03812	-0.891072	-0.0705396	1.78898	0.958991	0.247556	1.14632	-0.46435	-0.303	-0.411843	0.300329	1.42772	0.55461	1.03009	1.32119	0.491354	0.319196	-0.383595	0.236083	-0.583961	0.468658	1.62016	1.08328	-0.139389
HP-82866	positive	Late	122	0.774	6	3.35	-0.339051	-0.967038	-0.273762	-0.654886	0.662886	0.22467	0.38736	-0.210056	-1.16352	-0.913385	0.0855945	1.44822	-0.490979	1.33192	0.470108	1.60335	-0.884024	-1.1336	-1.6424	-0.157283	-0.160014	0.293328	0.115658	-1.28365
HP-82867	negative	Late	122	0.774	7	3.81	0.00389874	-0.380274	-0.191144	-0.210292	0.0338335	-1.66175	0.160585	0.333657	-0.540686	-1.0509	0.536056	-1.19989	1.08992	1.11338	1.04881	1.8156	0.21138	0.342549	-0.694463	0.715703	0.663662	0.698591	0.23513	-0.162639
HP-82869	positive	Late	104	0.6598	10	5.39	1.96373	-1.37872	-1.4423	-0.997066	1.25313	-0.276986	0.188671	-0.0288318	0.313895	-0.835888	-2.08611	-1.54574	-0.119516	0.420101	0.0826812	-1.89918	-0.509584	-3.13867	0.695703	0.0279819	-0.719975	-0.181142	-0.659045	-1.29533
HP-82870	negative	Late	132	0.8374	13	6.74	-0.104544	-1.10452	-1.89323	-0.187637	0.856943	0.877452	0.770022	-0.878768	0.380243	-1.05238	-1.3388	-0.295255	-0.104083	0.774396	0.14991	-0.477343	-1.27361	-1.87634	0.888773	-0.82044	-0.620907	1.09142	-0.254464	0.182495
HP-82871	negative	Late	96	0.609	3	1.68	1.18103	1.67225	1.89322	-0.720477	-0.863488	-0.665774	1.04456	0.39338	1.7034	0.163606	-1.51017	-0.0429872	-0.150174	-0.61249	-0.917926	0.267852	0.322642	-1.21634	0.559117	0.356734	-1.13031	-0.743697	-0.420775	-0.583373
HP-82872	negative	Late			10	5.48	2.02673	-1.21748	-0.398853	0.979881	-0.0119547	1.48733	0.122657	0.52687	-0.416836	1.80265	-1.61009	0.656959	-0.639802	-0.0723941	-0.890469	-2.01786	-1.85891	-1.88821	-0.375878	-1.46977	-0.540202	-1.19611	0.569468	-0.493325
HP-82873	negative	Late	124	0.7867	6	3.4	1.13653	-1.14859	0.735042	-1.48333	-0.855338	1.6418	1.92884	0.00163589	-0.773152	1.40219	1.06532	-1.15943	0.21312	0.153094	-0.584983	-1.71486	0.352765	-0.555303	-1.36195	0.473867	-0.359637	-1.35053	-0.479894	-0.207556
HP-82876	negative	Late	140	0.8882	1	0.57	-5.46503	-1.25152	-0.754116	-2.09654	-1.70205	-1.55433	1.02943	-1.77396	0.372643	-0.884726	-0.0246905	0.486208	0.931246	-0.291712	0.136325	-0.391225	1.65801	1.59012	1.3808	0.531764	-0.300942	0.420746	0.820491	0.359506
HP-82878	negative	Late	69	0.4377	11	5.51	-4.08639	-0.230969	-1.16178	0.258648	-1.45801	-0.67604	0.516667	-1.87064	0.224787	0.581722	1.3877	1.01781	0.791584	0.163909	0.542388	1.42634	1.51444	1.6306	1.07827	1.14723	1.72009	1.10815	1.71178	0.767228
HP-82880	negative	Late	85	0.5392	5	2.53	0.293193	0.217467	0.31372	1.32421	-1.09831	-1.28717	0.953181	-0.346703	0.944822	-0.542294	1.12156	-0.125585	1.0539	-0.464438	-0.0184428	0.631569	2.12681	1.01134	0.578329	1.79563	1.16313	0.925747	0.774581	0.422694
HP-82882	negative	Late	140	0.8882	5	2.74	-2.10039	-1.11742	-1.41054	-0.662365	-0.879364	-0.0595766	-0.693785	-0.751431	-0.249573	-0.677208	0.849131	-0.0544652	-0.498189	-0.102071	-0.433342	0.756183	-0.678184	-1.8495	0.286893	-1.89304	-0.64946	0.645017	0.481403	0.317013
HP-82883	negative	Late	89	0.5646	1	0.96	-3.06755	0.156122	0.0398677	-0.537826	-1.34344	-1.23902	-0.797855	0.399812	-0.814961	0.862831	1.38243	0.880191	0.721829	-0.146822	-0.478047	-0.689569	0.446133	0.130397	-0.0679582	0.520723	-0.914826	-1.48318	-0.258994	0.400913
HP-82884	negative	Late	165	1.047	3	1.66	-3.64262	-0.766924	-0.299484	-1.20775	-0.7512	0.965136	1.11991	-0.0931155	0.565303	-0.679699	0.41384	2.00216	-0.603257	0.384368	-0.175663	0.665988	0.356546	-0.731739	-0.173627	-0.214281	-0.288097	0.0907239	1.60262	0.0491434
HP-82887	positive	Late	20	0.1269	31	14.48	3.36053	0.0547392	-0.346675	0.238132	0.966314	0.491496	-0.116354	-0.280359	0.327441	0.515977	-0.65014	0.0471151	1.16022	1.31521	1.37959	0.566652	1.76315	0.852991	0.845471	1.3516	0.339327	0.895495	0.203511	0.195872
HP-82889	positive	Late	28	0.1776	42	21.69	6.01824	-0.813974	0.422809	1.2362	1.73265	-1.08226	-0.349112	0.790049	-1.04188	-0.538224	-0.176466	0.338696	0.235629	0.273527	0.756792	-0.0394132	0.357852	-0.66193	-0.243422	-0.305027	0.288541	0.302562	-0.079907	-0.983042
HP-82890	negative	Late	34	0.2157	17	8.11	1.47854	-0.416583	-0.0299048	0.0551284	0.136549	0.462303	0.857626	0.101186	1.13629	-0.780603	-0.27989	-0.668161	0.331877	-0.186543	0.09892	0.861805	0.469237	0.539567	0.230952	-0.234796	0.238097	0.41964	0.783908	0.23114
HP-82891	negative	Late	41	0.2601	10	4.9	2.90992	-0.1081	1.12418	0.139942	-0.354878	1.45487	1.39003	0.283281	0.728984	-1.40022	0.984256	-0.0100775	0.713977	0.377386	0.507329	0.806967	-0.744421	0.053967	0.394402	-0.159534	0.42445	0.367538	0.0434418	-0.376587
HP-82892	negative	Late	23	0.1459	16	8.2	2.7163	1.77917	0.171265	0.444874	-1.09055	-0.325415	1.01667	0.975513	-0.118115	0.194805	0.355113	0.647433	0.35641	-0.404901	0.0812813	0.279862	1.35719	1.01129	1.04106	0.58946	0.154302	1.57672	1.05999	0.105188
HP-82893	positive	Late	65	0.4124	17	8.44	1.9493	0.28097	0.198883	-0.46179	0.745446	0.322897	0.839304	0.608637	1.11715	-0.561025	1.17653	1.11472	0.648522	0.549167	0.620636	-0.37536	0.383324	0.140373	-0.850886	0.747687	0.793106	0.607515	0.350719	-0.53473
HP-55669	positive	Met	150	0.9516	4	2.41	0.171334	-0.733189	-1.07511	0.0594573	0.424945	0.587263	-1.23589	-0.335132	-0.63087	0.455705	-1.8422	-1.81191	-1.38499	-2.36316	-3.02001	-1.94162	-1.33881	-2.9923	-1.57902	-1.47037	-2.49986	-0.988308	-1.17408	-0.740962
HP-81356	negative	Met	87	0.5519	13	7.17	-2.80345	0.76609	-0.443729	-0.723725	-1.69781	-0.320806	-0.183387	-0.131126	-1.01683	0.185876	2.23264	1.2217	0.112405	-0.274102	-0.314361	-1.46488	0.172221	-0.51465	-0.691196	-0.961935	0.120194	-1.51309	0.160034	-0.218258
HP-82298	negative	Met	51	0.3235	13	7.08	3.71455	0.152119	-0.0575692	0.6849	-2.0434	-1.77421	-0.609253	0.821261	-0.410611	-0.893399	-0.887433	-2.06454	-0.801284	-1.50192	-1.31224	0.422917	0.788054	0.717174	-1.85339	-1.65492	-2.68637	0.875277	-0.470517	-1.00402
HP-82299	negative	Met	73	0.4631	6	3.79	-1.49118	-1.46483	-1.36983	3.17008	-1.92089	-1.4653	-3.29454	-2.12481	-2.24057	1.51769	-1.57274	-1.7044	-1.02584	-2.05874	-2.48989	-0.36689	-2.61465	-1.76195	-2.13932	-1.95258	-2.89075	-0.159838	-1.65702	0.667992
HP-82301	positive	Met	26	0.1649	65	33.08	7.86843	-0.739642	-0.63614	1.45144	1.75262	-1.06709	-0.833213	0.482339	-1.08223	-1.0482	-1.28023	-0.491352	-0.220211	-0.238255	-0.0275708	-0.732929	0.145334	-0.765696	0.0690836	-0.393971	-1.19458	0.47781	-1.16171	-1.05583
HP-82895	negative	Met	112	0.7105	6	2.78	0.465563	-0.0100453	-0.208911	1.6708	0.0912296	-0.815489	-0.553766	-2.07593	-0.254567	2.36838	1.0512	1.49077	-0.0300079	-0.20731	-0.37736	-1.68424	-0.638525	0.425932	-0.618718	0.114591	-0.513559	1.09918	-0.312483	1.31674
HP-82896	negative	Met	135	0.8565	4	2.81	-0.637849	-0.749081	-0.561569	0.891821	-1.31524	-1.11117	-0.542488	-0.170915	-1.80889	-0.389387	1.05808	-1.32003	-0.90091	-0.823141	-1.39811	-2.02477	-3.13936	-2.39634	-2.21819	-2.04902	-1.2446	-0.272206	-2.80999	-0.233356
HP-82897	negative	Met	120	0.7613	6	3.62	-3.43029	-1.44072	0.291582	-1.18214	-2.33368	-1.787	-0.963255	-2.30889	0.306884	-0.342582	0.747023	-0.316362	-0.148275	-0.121418	-0.576033	0.773711	2.47623	0.546366	-0.276282	-0.145342	-0.48407	0.56195	-2.29116	1.03925
HP-82899	negative	Met	82	0.5202	12	5.85	0.721432	-1.63893	-1.80323	0.709806	1.21625	0.352574	0.418006	0.1469	0.18536	-0.0924607	3.13949	0.364272	1.11328	0.47221	1.01206	0.820044	0.661536	1.23236	1.1745	0.726501	1.98065	0.599019	0.547529	-0.736826

## Sheet: S-Table4
	Signature	Genes	Reference
	AR signature	MPHOSPH9, ADAM7, FOLH1, CD200, FKBP5, GLRA2, NDRG1,	Beltran H. et al., Nat Med. 2016 March ; 22(3): 298–305. doi:10.1038/nm.4045; Supplementary Table 2
		CAMKK2, MAN1A1, MED28, ELL2, ACSL3, PMEPA1,
		GNMT, ABCC4, HERC3, PIP4K2B, KLK3, EAF2, CENPN,
		MAPRE2, NKX3-1, KLK2, AR, TNK1, MAF,
		C1ORF116, TMPRSS2, TBC1D9B, ZBTB10
	PI3K	AKT, mTOR, PTEN, EGR1, c-JUN, PHLPP, HER3	Edling M, et al. Asian J Androl. 2014 May-Jun; 16(3): 378–386.
	MAPK	MEK4/MKK4, JNK, PHLDA1, CCND1, ETV4, ETV5, SPRY2, SPRY4, DUSP4, DUSP6, EPHA2, EPHA4	Wagle M, et al. NPJ Precis. Oncology. 2018 Mar 7;2(1):7. doi: 10.1038/s41698-018-0051-4
	Cell Cycle progression	FOXM1, CDC20. CDKN3, CDC2, KIF11, KIAA0101, NUSAP1, CENPF, ASPM, BUB1B, RRM2, DLGAP5, BIRC5, KIF20A, PLK1, TOP2A, TK1, PBK, ASF1B, C18orf24, RAD54L, PTTG1, CDCA3, MCM10, PRC1, DTL, CEP55, RAD51, CENPM, CDCA8, ORC6L	Cuzick J, et al. Lancet Oncol. 2011 Mar;12(3):245-55. doi: 10.1016/S1470-2045(10)70295-3.
	ERG	TDRD1, CACNA1D, NCALD, HLA-DMB, KCNH8, PDE3B, PLA2G7, CSGALNACT1, PART1, HES1, F3, GPR110, SH3RF1, PDE8B, SEPT9, CRISP3, AMD1, KCNG3, PLA1A, MYO6, FRK, SH3YL1, ACER3, C8orf4, KHDRBS3 GHR, ITPR1, NPY, GUCY1A3, ARHGDIB, LAMC2, VWA2, ZNF432, MORN1, CYorf15B, AMPD3, QDPR, HDAC1, KIF16B , GJB1, ITPR3, ZNF615, ANKRD6, APOD, STEAP4, RGS17, MAP7, C22orf36, NKAIN1, CHN2, LRRFIP1, SERGEF, ATPBA2, NDRG1, CD…	Tomlins SA, et.al.,Supp Table S5 Eur Urol. 2015 October ; 68(4): 555–567. doi:10.1016/j.eururo.2015.04.033.
	ETS	FAM65B, AMACR, ZNF385B, CDK19, ARHGAP18, IL5RA, SLC16A1, CNTLN, FKBP10, SLC45A2, CLIP1, HEXB, NEFH, ODZ1, SS18L2	Tomlins SA, et.al.,Supp Table S5 Eur Urol. 2015 October ; 68(4): 555–567. doi:10.1016/j.eururo.2015.04.033.
	SPINK1	SPINK1, HPGD, FAM3B, MIPEP, NCAPD3, INPP4B, ANPEP, TFF3, IL31RA, EHHADH, RP11-45B20.2, CCDC141, RLN1, ABHD2, SCIN	Tomlins SA, et al. Cancer Cell. 2008 Jun; 13(6): 519–528. doi: 10.1016/j.ccr.2008.04.016, Tomlins SA, et.al., (paper#4) Supp Table S5 Eur Urol. 2015 October ; 68(4): 555–567. doi:10.1016/j.eururo.2015.04.033.
	Triple Neg (ERG-/ETS-/SPINK1-)	TFF3, ALOX15B, MON1B	Tomlins SA, et.al.,Supp Table S5 Eur Urol. 2015 October ; 68(4): 555–567. doi:10.1016/j.eururo.2015.04.033.
	T-effector	CD8A, GZMA, GZMB, PRF1, IFNG	Mariathasan S, et al., Nature. 2018 Feb 22;554(7693):544-548. doi: 10.1038/nature25501. Epub 2018 Feb 14.
	IFNg induced	IFNG, STAT1, CXCL9, CXCL10, CXCL11	Mariathasan S, et al., Nature. 2018 Feb 22;554(7693):544-548. doi: 10.1038/nature25501. Epub 2018 Feb 14.
	Class-I Antigen processing	HLA-A, HLA-B, HLA-C, B2M, TAP1, TAP2, TAPBP, PSMB8, PSMB9	Mariathasan S, et al., Nature. 2018 Feb 22;554(7693):544-548. doi: 10.1038/nature25501. Epub 2018 Feb 14.
	B cells	CD19, MS4A1/CD20, CD79A	Mariathasan S, et al., Nature. 2018 Feb 22;554(7693):544-548. doi: 10.1038/nature25501. Epub 2018 Feb 14.
	NK cells	KLRC1, KLRC2, KLRC3, NCAM1, KIR2DL2, KIRDL3	Mariathasan S, et al., Nature. 2018 Feb 22;554(7693):544-548. doi: 10.1038/nature25501. Epub 2018 Feb 14.
	Immune suppressors	LGALS1, TGFb1, IL10, PTGES2, ARG1	Mariathasan S, et al., Nature. 2018 Feb 22;554(7693):544-548. doi: 10.1038/nature25501. Epub 2018 Feb 14.
	MDSCs	CD68, CD163, ARG1, NOS2, ITGAM, CD33, LAIR1, IL34	Mariathasan S, et al., Nature. 2018 Feb 22;554(7693):544-548. doi: 10.1038/nature25501. Epub 2018 Feb 14.
	Treg	FOXP3, IKZF2, ENTPD1	Mariathasan S, et al., Nature. 2018 Feb 22;554(7693):544-548. doi: 10.1038/nature25501. Epub 2018 Feb 14.
	M1	IL2RA, IL15RA, CXCL11, CCL19, CXCL10, CXCL9, CCL15, TRAIL, PBEF1, ECGF1, BCL2A1, SLC7A5, SLC2A6, SLC31A2, PLA1A, HSD11B1, PFKFB3, PSME2, PSMA2,APOL2, HESX1	Mariathasan S, et al., Nature. 2018 Feb 22;554(7693):544-548. doi: 10.1038/nature25501. Epub 2018 Feb 14.
	M2	TGFBR2, HRH1, MS4A6A, CD36, MRC1, IGF1, CCL18, SLC38A6, CTSC, HEXB, LIPA, HS3ST2, LTA4H, TGFBI, EGR2, IRF5	Mariathasan S, et al., Nature. 2018 Feb 22;554(7693):544-548. doi: 10.1038/nature25501. Epub 2018 Feb 14.
	APC checkpoint inhibitors	CD274, PDCD1LG2, IDO	Mariathasan S, et al., Nature. 2018 Feb 22;554(7693):544-548. doi: 10.1038/nature25501. Epub 2018 Feb 14.
	T cell checkpoint inhibitors	BTLA, LAG3, HAVCR2, PDCD1, TIGIT, CTLA4	Mariathasan S, et al., Nature. 2018 Feb 22;554(7693):544-548. doi: 10.1038/nature25501. Epub 2018 Feb 14.
	Activated stroma	TGFb1, FAP, LOX, POSTN, NUAK, BGN, PDPN, COL4A1, COL5A1, COL5A2	Mariathasan S, et al., Nature. 2018 Feb 22;554(7693):544-548. doi: 10.1038/nature25501. Epub 2018 Feb 14.
	EMT	VIM, ZEB1, ZEB2, TWIST1, TWIST2, SNAI1, SNA2, RUNX2	Mariathasan S, et al., Nature. 2018 Feb 22;554(7693):544-548. doi: 10.1038/nature25501. Epub 2018 Feb 14.
	Activated T-cell signature	CD8A, GZMA, GZMB, PRF1, IFNG, CXCL9, CXCL10, TBX21	Mariathasan S, et al., Nature. 2018 Feb 22;554(7693):544-548. doi: 10.1038/nature25501. Epub 2018 Feb 14.
	NEPC (neuroendocrine) gene classifier	CHGA, NSE, AR, CCND1, CIITA, CREBBP, CSDE1, CYLD, DICER1, FHIT, FOXP1, HERPUD1, MMP2, MYH9, NUP93, PAX8, RBBP6, TRIM33, GATA2, MAPKAPK3, SPDEF, ASXL3, CAND2, ETV5, GPX2, JAKMIP2, KIAA0408, SOGA3, TRIM9, BRINP1, C7orf76, GNAO1, KCNB2, KCND2, LRRC16B, MAP10, NRSN1, PCSK1, PROX1, RGS7, SCG3, SEC11C, SEZ6, ST8SIA3, SVOP, SYT11, ARHGAP8, CATSPERB, EFNA4, EPN3, EVPL, HOXB13, KLK3, KLK4, LMAN1L, NKX3-1,…	Beltran H. et al., Nat Med. 2016 March ; 22(3): 298–305. doi:10.1038/nm.4045; Supplementary Table 2

## Sheet: S-Table5
	Antibody	clone(s)	vendor	catalogue number
	PDL-1	SP142	Ventana	‎740-4859
	AR	AR441	Dako	M356201-2
	PanCK	AE1/AE3/PCK26	Ventana	‎05266840001

## Sheet: S-Table6
Subject_ID	stage	Tumor AR index	Stroma AR index	% Stromal TILS	PDL-1 IC score	PDL-1 TC score
HP-104135	Met	0.801274	0.378508	30	IC1	TC0
HP-104527	Met	0.438844	0.296399	1	IC1	TC0
HP-106386	Late	0.7046	0.537309	1	IC0	TC0
HP-106387	Late	0.573346	0.324614	5	IC1	TC0
HP-106388	Early/Intermediate	0.705235	0.519764	10	IC0	TC0
HP-106389	Late	0.462287	0.230275	1	IC1	TC0
HP-50495	Met	0.708224	0.392993	0	IC0	TC0
HP-50619	Late	0.796651	0.321668	0	IC1	TC0
HP-50626	Late	0.677401	0.290126	0	IC0	TC0
HP-50644	Late	0.664179	0.476646	0	IC0	TC0
HP-55659	Met	0.746942	0.716939	0	IC0	TC0
HP-55664	Met	0.659521	0.148575	0	IC1	TC0
HP-55668	Met	0.681082	0.177202	5	IC0	TC0
HP-55669	Met	0.693977	0.482681	0	IC0	TC0
HP-63198	Early/Intermediate	0.601969	0.357429	5	IC0	TC0
HP-63199	Early/Intermediate	0.790382	0.524454	5	IC1	TC0
HP-63201	Early/Intermediate	0.688369	0.466048	0	IC0	TC0
HP-63202	Early/Intermediate	0.630039	0.421738	5	IC0	TC0
HP-63204	Early/Intermediate	0.264821	0.265338	5	IC0	TC0
HP-63205	Early/Intermediate	0.0584971	0.031622	5	IC0	TC0
HP-63208	Early/Intermediate	0.695028	0.330669	0	IC0	TC0
HP-63210	Early/Intermediate	0.659153	0.366671	5	IC0	TC0
HP-63211	Early/Intermediate	0.414319	0.227341	5	IC1	TC0
HP-64941	Early/Intermediate	0.522043	0.255822	0	IC1	TC0
HP-64945	Early/Intermediate	0.690921	0.313673	0	IC1	TC0
HP-64951	Early/Intermediate	0.619758	0.419267	5	IC0	TC0
HP-69716	Early/Intermediate	0.620103	0.287703	5	IC0	TC0
HP-69725	Early/Intermediate	no data available	no data available	5	IC0	TC0
HP-69733	Early/Intermediate	0.271357	0.213398	0	IC0	TC0
HP-69739	Early/Intermediate	0.634006	0.540639	5	IC0	TC0
HP-69742	Early/Intermediate	0.0717095	0.0351459	0	IC1	TC0
HP-69744	Early/Intermediate	0.280029	0.279474	5	IC0	TC0
HP-69745	Early/Intermediate	0.653989	0.290571	10	IC0	TC0
HP-69746	Early/Intermediate	0.353681	0.132084	1	IC0	TC0
HP-69747	Early/Intermediate	0.549835	0.284375	3	IC0	TC0
HP-69750	Early/Intermediate	0.800381	0.588546	5	IC0	TC0
HP-70352	Late	0.40755	0.15277	0	IC1	TC0
HP-70353	Late	0.608443	0.156228	3	IC0	TC0
HP-70354	Late	0.639664	0.461747	3	IC0	TC0
HP-70355	Late	0.507382	0.29448	2	IC0	TC0
HP-70356	Late	0.423358	0.317242	3	IC1	TC0
HP-80761	Late	0.237993	0.201544	3	IC1	TC0
HP-80766	Late	0.266104	0.151977	10	IC1	TC0
HP-81353	Late	0.747389	0.331037	0	IC0	TC0
HP-81355	Late	0.638195	0.215092	0	IC0	TC0
HP-81356	Met	0.784265	0.38645	10	IC0	TC0
HP-81357	Late	0.65553	0.312551	5	IC1	TC0
HP-81359	Late	0.731524	0.431644	10	IC0	TC0
HP-81366	Late	0.616356	0.324382	5	IC0	TC0
HP-81367	Late	0.606601	0.250489	0	IC0	TC0
HP-81369	Late	0.798653	0.562445	10	IC0	TC0
HP-81370	Late	0.47556	0.2984	0	IC0	TC0
HP-81376	Late	0.495759	0.305564	5	IC1	TC0
HP-81382	Late	0.683414	0.489984	5	IC0	TC0
HP-81384	Late	0.314276	0.246384	0	IC0	TC0
HP-81385	Late	0.374667	0.0884459	20	IC0	TC0
HP-81387	Late	0.697899	0.451213	0	IC0	TC0
HP-81388	Late	0.796827	0.513451	6	IC0	TC0
HP-81391	Late	0.801786	0.701925	5	IC0	TC0
HP-81393	Late	0.826379	0.719692	10	IC0	TC0
HP-81395	Late	0.803699	0.548551	4	IC0	TC1
HP-81398	Early/Intermediate	0.219048	0.195407	4	IC0	TC0
HP-82164	BPH	0.700452	0.565164	1	IC0	TC0
HP-82165	BPH	0.709021	0.544948	5	IC0	TC0
HP-82166	BPH	0.794517	0.606352	8	IC0	TC0
HP-82168	BPH	0.646568	0.690492	1	IC0	TC0
HP-82169	BPH	0.812414	0.716791	1	IC0	TC0
HP-82170	BPH	0.852505	0.731623	1	IC0	TC0
HP-82171	BPH	0.712554	0.598263	10	IC0	TC0
HP-82172	BPH	0.711272	0.626098	1	IC0	TC0
HP-82173	BPH	0.811965	0.736402	0.5	IC1	TC0
HP-82298	Met	0.864083	0.651992	5	IC0	TC0
HP-82299	Met	0.840371	0.363654	5	IC0	TC0
HP-82301	Met	0.836351	0.745674	5	IC0	TC0
HP-82479	Late	0.451868	0.240303	6	IC0	TC0
HP-82482	Late	0.113776	0.146896	6	IC0	TC0
HP-82483	Late	0.691187	0.325045	2	IC3	TC0
HP-82486	Late	0.686448	0.471109	4	IC0	TC0
HP-82491	Late	0.638061	0.655172	2	IC0	TC0
HP-82493	Late	0.533585	0.169062	0	IC0	TC0
HP-82495	Late	0.302486	0.166415	5	IC0	TC0
HP-82496	Late	0.834877	0.754126	2	IC1	TC1
HP-82723	Late	0.315776	0.174485	8	IC0	TC1
HP-82728	Late	0.0130764	0.0140581	1	IC0	TC0
HP-82731	Late	0.38749	0.249285	3	IC0	TC0
HP-82732	Late	0.266876	0.192716	5	IC1	TC0
HP-82736	Late	0.683749	0.598174	2	IC1	TC0
HP-82737	Late	0.744233	0.562661	3	IC0	TC0
HP-82739	Late	0.912265	0.421652	2	IC1	TC0
HP-82746	Late	0.839446	0.63157	2	IC0	TC0
HP-82748	Late	0.709699	0.389633	2	IC0	TC0
HP-82749	Late	0.455796	0.315612	2	IC0	TC0
HP-82757	Late	0.638147	0.252254	5	IC0	TC0
HP-82759	Late	0.746194	0.536928	2	IC0	TC0
HP-82769	Late	0.552343	0.335504	2	IC1	TC0
HP-82772	Late	0.567025	0.422532	4	IC0	TC0
HP-82775	Late	0.0321184	0.0319525	3	IC0	TC0
HP-82778	Late	0.414752	0.0732404	4	IC0	TC0
HP-82779	Late	0.703818	0.394445	3	IC0	TC0
HP-82781	Late	no data available	no data available	5	IC1	TC1
HP-82784	Late	0.478872	0.195032	2	IC0	TC0
HP-82786	Late	0.51807	0.30364	4	IC0	TC0
HP-82787	Late	0.186494	0.0614583	2	IC1	TC0
HP-82788	Late	0.565689	0.434509	4	IC0	TC0
HP-82790	Late	0.546013	0.356309	3	IC0	TC0
HP-82793	Late	0.813959	0.540844	2	IC0	TC0
HP-82794	Late	0.75677	0.604783	3	IC1	TC0
HP-82795	Late	0.278027	0.182468	3	IC1	TC0
HP-82796	Late	0.347918	0.106963	8	IC1	TC0
HP-82799	Late	0.770932	0.225281	5	IC0	TC0
HP-82802	Late	0.188426	0.0672139	3	IC0	TC0
HP-82804	Late	0.72581	0.536728	3	IC0	TC0
HP-82809	Late	0.806899	0.318989	2	IC0	TC0
HP-82812	Late	no data available	no data available	2	IC0	TC0
HP-82814	Late	0.499947	0.0519734	4	IC0	TC0
HP-82815	Late	0.86187	0.723213	3	IC0	TC0
HP-82816	Late	0.602833	0.478071	8	IC1	TC0
HP-82817	Late	0.761875	0.417614	8	IC1	TC0
HP-82820	Late	0.615142	0.376502	4	IC0	TC0
HP-82823	Late	0.864982	0.569403	3	IC0	TC0
HP-82824	Late	0.642273	0.101983	3	IC0	TC0
HP-82827	Late	0.794386	0.347473	1	IC0	TC0
HP-82828	Late	0.74032	0.316424	3	IC0	TC0
HP-82829	Late	0.656096	0.255105	1	IC1	TC0
HP-82831	Late	0.643134	0.15182	7	IC0	TC0
HP-82833	Late	0.0899747	0.0564223	3	IC1	TC0
HP-82835	Late	0.761099	0.276153	3	IC0	TC0
HP-82836	Late	0.223522	0.0775498	3	IC1	TC0
HP-82837	Late	0.771048	0.167413	3	IC0	TC0
HP-82838	Late	0.32699	0.164543	2	IC0	TC0
HP-82840	Late	0.663861	0.507535	3	IC1	TC0
HP-82842	Late	0.747364	0.292701	2	IC1	TC0
HP-82843	Early/Intermediate	0.787686	0.504204	3	IC0	TC0
HP-82844	Late	0.733975	0.3604	3	IC1	TC0
HP-82845	Late	0.743746	0.450406	3	IC1	TC0
HP-82846	Early/Intermediate	0.821873	0.496665	15	IC1	TC0
HP-82848	Late	0.364287	0.226255	5	IC1	TC1
HP-82849	Late	0.644035	0.274328	5	IC1	TC0
HP-82850	Early/Intermediate	0.566378	0.216175	0	IC1	TC0
HP-82852	Late	0.724504	0.49576	5	IC0	TC0
HP-82853	Late	0.488355	0.161121	10	IC0	TC0
HP-82854	Early/Intermediate	0.12449	0.0325473	5	IC1	TC0
HP-82856	Late	0.495017	0.204614	5	IC1	TC0
HP-82857	Late	0.760585	0.399363	5	IC1	TC0
HP-82858	Late	0.801826	0.401208	5	IC1	TC0
HP-82859	Early/Intermediate	0.618742	0.387291	5	IC0	TC0
HP-82860	Late	0.245926	0.148205	5	IC3	TC0
HP-82861	Late	0.477672	0.134545	10	IC1	TC0
HP-82862	Early/Intermediate	0.221792	0.113729	0	IC0	TC0
HP-82863	Late	0.202901	0.179186	0	IC0	TC0
HP-82864	Late	0.773264	0.503328	3	IC1	TC0
HP-82865	Late	0.536107	0.134071	3	IC0	TC0
HP-82866	Late	0.547568	0.108202	4	IC1	TC0
HP-82867	Late	0.347811	0.140828	3	IC0	TC0
HP-82869	Late	0.760146	0.421827	3	IC0	TC0
HP-82870	Late	0.565734	0.190424	3	IC1	TC0
HP-82871	Late	0.727672	0.414144	3	IC0	TC0
HP-82872	Late	0.849179	0.592774	1	IC1	TC0
HP-82873	Late	0.530996	0.179117	3	IC1	TC0
HP-82874	Early/Intermediate	0.113378	0.0588106	1	IC1	TC0
HP-82876	Late	0.482954	0.181506	2	IC0	TC0
HP-82877	Late	0.613957	0.202546	3	IC0	TC0
HP-82878	Late	0.577064	0.447111	10	IC1	TC0
HP-82880	Late	0.645574	0.159742	5	IC0	TC1
HP-82881	Early/Intermediate	0.525613	0.239555	5	IC1	TC0
HP-82882	Late	0.580609	0.224891	1	IC0	TC0
HP-82883	Late	0.506413	0.191507	1	IC0	TC0
HP-82884	Late	0.571175	0.3068	1	IC1	TC0
HP-82886	Late	0.0469493	0.0223906	1	IC0	TC0
HP-82887	Late	0.699863	0.303104	1	IC1	TC0
HP-82889	Late	0.591674	0.364856	5	IC1	TC0
HP-82890	Late	0.593896	0.341745	1	IC0	TC0
HP-82891	Late	0.662101	0.206411	1	IC1	TC0
HP-82892	Late	0.332367	0.159596	1	IC0	TC0
HP-82893	Late	0.68175	0.565984	1	IC0	TC0
HP-82895	Met	0.629141	0.454877	1	IC3	TC0
HP-82896	Met	0.23285	0.247737	5	IC0	TC0
HP-82897	Met	0.106764	0.0184634	10	IC0	TC0
HP-82899	Met	0.363442	0.143543	1	IC0	TC0
HP-90387	BPH	0.756774	0.576068	1	IC0	TC0

## Sheet: S-Table7
Subject_ID	Ge_Tissue	Ge_Groups	Presence of ERG or TMPRSS2 fusions	All fusions
HP-81391	Prostate	Late	HLCS - ERG	HECTD4 - KCTD19, MRPL11 - MALAT1, HLCS - ERG
HP-82864	Prostate	Late	LINC00114 - ERG, TMPRSS2 - ERG, PCCA - ERG, TMPRSS2 - LINC00114	MRPL11 - MALAT1, PLD5 - PMF1-BGLAP, EIF2S3 - EIF2S3L, LINC00114 - ERG, CSGALNACT1 - SLC18A1, MIR4801 - AC098617.1, ZNF652 - HMGN2P6, PRH1 - POLRMTP1, XXbac-BPGBPG34I8.2 - ENY2, RPS3AP5 - ACSL3, HYAL2 - PTH1R, SVOPL - REPS2, MRPL11 - MALAT1, DDTL - AP000350.6, PIK3C3 - LRRC7, FOXK1 - APPBP2, MRPL11 - MALAT1, KIF4B - COPB1, DHX30 - HYAL2, USP9X - KRT18P41, NADSYN1 - ZNF804A, FARP1 - CALM2P4, FYTTD1…
HP-81393	Prostate	Late	MAGEB16 - ERG, TMPRSS2 - ERG	PPT2-EGFL8 - C2CD2, SGCD - TRPM8, B4GALT1 - TMC1, MAGEB16 - ERG, SLC2A12 - CTTNBP2, SVOPL - REPS2, TMPRSS2 - ERG, SUMF1 - SLC5A12
HP-82809	Prostate	Late	PCAT4 - TMPRSS2	PCAT4 - TMPRSS2, ULK1 - HMCN1
HP-81353	Prostate	Late	PDXK - TMPRSS2, TMPRSS2 - ERG	ARL17B - KANSL1, ZNF559-ZNF177 - ZYXP1, CBR3-AS1 - PDXK, FTO - ADGRB1, PDXK - TMPRSS2, TCF15 - CTNND2, PLCB1 - STAG2, RCOR3 - PRSS51, DLGAP1 - CATSPERB, WDR74 - BTRC, XXYLT1 - PPP1R2, TMPRSS2 - ERG, EZR - PEMT, SHROOM3 - PACRG, AGRN - RP5-857K21.4, ARL8B - LMCD1-AS1, RCOR3 - PRSS51, DDTL - AP000350.6, TMPRSS2 - ERG, AC005578.3 - AHSA2, LINC00276 - ARHGEF1, TBL1XR1 - MCCC1, ATP5J2P3 - PRUNE2, TMEF…
HP-106386	Prostate	Late	RBM5 - TMPRSS2, TMPRSS2 - ERG	RPH3A - ADAMTS9-AS2, RBPMS - POLQ, SNX21 - AGPAT4, STAG3L5P-PVRIG2P-PILRB - STAG3, RBM5 - TMPRSS2, MALAT1 - MIR302F, LIMCH1 - TUSC3, MRPL11 - MALAT1, RHOBTB1 - SETBP1, KANSL1 - PCSK5, LYPD6B - ABI2, ZBTB16 - MTR, ARL17B - KANSL1, SWAP70 - BBOX1-AS1, ACTR3B - RIC3, MYO7A - LINC-PINT, SLC45A4 - ADD1, DSCAML1 - FOXA1, ATP1B3 - MTND5P34, DDTL - AP000350.6, EIF2AP4 - CORO1C, ZNF670-ZNF695 - GBF1, SNX1…
HP-63210	Prostate	Early/Intermediate	SLC45A3 - ERG	TRIM51GP - GALNT7, KCMF1 - EMILIN1, AKR1C8P - LINC00276, CTA-109P11.4 - PTPRK, RPS3AP5 - ACSL3, NEDD4L - PPCS, MYH9 - RP4-633O19__A.1, GRIA1 - RNVU1-19, CLSTN2 - TRIM56, SEC24D - HLA-B, SLC45A3 - ERG, CAPZA2 - ACPP, SHROOM1 - PRKG1, ZNRD1ASP - HLA-B, CSGALNACT1 - SLC18A1, TRPM8 - C1orf132, CDH20 - PARP8, ANK3 - COL19A1, OR6L1P - OR6L2P, MARCKS - AP000230.1, RUVBL1 - LSAMP, TNRC6C - SEPT9, MALAT1 …
HP-82893	Prostate	Late	SLC45A3 - ERG	RPL32P3 - ABCG1, GTF2F2 - TPT1, MRPL11 - MALAT1, SPAST - MNAT1, SERTAD2 - PDZRN3, SLC45A3 - ERG, CSGALNACT1 - SLC18A1, MRPL11 - MALAT1, AK5 - CATSPERB, KRT18P44 - KCTD12, PIAS2 - TSPAN2, SEPP1 - ZNF131, IGF1R - ADK, CSNK1A1 - PDE6A, ZNF532 - PDHA1, SETD3 - SUCLG2-AS1, SOX2-OT - TOMM20
HP-82887	Prostate	Late	TBC1D30 - ERG, ERG - XPOT, TMPRSS2 - ERG	TBC1D30 - ERG, SOX2-OT - TOMM20, ADSS - CASC18, MRPL11 - MALAT1, BCKDHB - EXOC5P1, HMGN1 - C2orf42, LINC01221 - MYO10, CEP295 - RPS4XP18, SMN2 - CSAD, SMARCA2 - LINC01242, ERG - XPOT, PDIA3 - INPP4A, MRPL11 - MALAT1, AC002519.6 - PPP2CB, GRIA1 - RNVU1-19, LINC00969 - SDHAP1, DCAF4L1 - LIMCH1, SVIL-AS1 - SVILP1, CTD-2083E4.6 - LINC00969, UPF2 - NRG3, TMPRSS2 - ERG, EZR - PEMT, MRPL11 - MALAT1, LAR…
HP-50619	Prostate	Late	TMPRSS2 - CTD-2653M23.3	MALAT1 - TIGD3, RGL1 - LINC01297, MALAT1 - TNFRSF10D, KCTD2 - DHX8, MRPL11 - MALAT1, HIST1H2AC - MYLK4, TMPRSS2 - CTD-2653M23.3, MRPL11 - MALAT1, CTD-2013M15.1 - PPP1R1AP2, MRPL11 - MALAT1, MRPL11 - MALAT1, SACM1L - TGM4, PPP2R2A - AC102948.2, SLC35F1 - CEP85L
HP-106387	Prostate	Late	TMPRSS2 - ERG	USP33 - MCC, LINC00894 - ENOX2, NEBL - EFNB2, MRPL11 - MALAT1, FGF13 - EIF4G3, MRPL11 - MALAT1, TESK2 - CARM1, TMPRSS2 - ERG, MCC - MALAT1, MTDH - RNF144B, ARMC10 - CACNA1E, USP34 - CLEC19A
HP-106388	Prostate	Early/Intermediate	TMPRSS2 - ERG	ULK4 - CTNNB1, MRPL11 - MALAT1, FAM208A - EIF2S2, MED8 - LHPP, LIMD1 - LTF, CORO1A - SERPINE1, AC073072.1 - CFLAR, CSNK1A1 - PDE6A, ZNF827 - SLC9A2, STRN3 - OR6M1, TES - BEND4, FTX - MIR5708, TAGLN - SIK3, TRPS1 - DNAH14, MRPL11 - MALAT1, GPAT4 - RPRD2, TAGLN - SIK3, DAGLA - KLK3, CFAP36 - TTC6, TGFBR1 - CORO2A, TAGLN - SIK3, FCHO2 - ATP8A2P3, SDHAP1 - LINC00969, SNX1 - BBS9, FBXL13 - CUX1, CASKI…
HP-106389	Prostate	Late	TMPRSS2 - ERG	MRPL11 - MALAT1, MRPL11 - MALAT1, TAGLN - SIK3, NTRK3 - RALGDS, FARP1 - IL1RL1, AF003626.1 - MAFF, LIMCH1 - TUSC3, UBE2E1 - ARID3A, USP9Y - FAF1, TMPRSS2 - ERG, RPL14P1 - CADPS, SYNM - INPP4B, THBS1 - C15orf53, B4GALT6 - BCAS3, USP10 - RNLS, FOXK2 - MAN1C1, HEATR3 - NRG3, ULK4 - CTNNB1, C7orf50 - TMEM184A, LMCD1-AS1 - MAMDC2, SOX2-OT - GAS5, NKTR - SALL4, PRRC2B - FUBP3, ADARB2 - GHR, BMPR2 - PRK…
HP-55669	Not Otherwise Specified	Mets	TMPRSS2 - ERG	AFF1 - PKD1L2, AC098617.1 - MALAT1, CASZ1 - C1orf127, TMPRSS2 - ERG
HP-63199	Prostate	Early/Intermediate	TMPRSS2 - ERG	TMPRSS2 - ERG, LRBA - FAM129A, RBM39 - CNBD2, HBQ1 - LINC00375, TAGLN - SIK3, LINC01297 - AL050303.11, CSNK1A1 - PDE6A, USP40 - SEMA3A, POTEG - DHX30, LINC01282 - MBD5, U3 - SNX5, TRPM1 - NUTM2A-AS1
HP-63201	Prostate	Early/Intermediate	TMPRSS2 - ERG	TMPRSS2 - ERG, SLC45A3 - PLCL2, PDS5A - UBE2H, RNF144A - AC021021.1, WDR74 - BTRC
HP-64941	Prostate	Early/Intermediate	TMPRSS2 - ERG	RPS3AP5 - ACSL3, RNVU1-7 - FILIP1, THBS1 - C15orf53, TMPRSS2 - ERG, NARS2 - HS3ST3A1, PCAT14 - RPL24, TMPRSS2 - ERG, TPM1 - PTPRG, MAML3 - NECTIN1, ABCC4 - SLC38A1, TMPRSS2 - ERG, TMPRSS2 - ERG, ABCC4 - EPHB1, SLC38A1 - ABCC4, CD2AP - COL21A1
HP-69746	Prostate	Early/Intermediate	TMPRSS2 - ERG	NFIA - MID1, WWP1 - CTA-407F11.8, PPP3CA - C4orf19, DHX15 - SPNS3, ARL17B - KANSL1, TMPRSS2 - ERG, NDRG1 - OXCT1
HP-69750	Prostate	Early/Intermediate	TMPRSS2 - ERG	SLC16A1-AS1 - MSRB3, TMPRSS2 - ERG, ACPP - PDE4D, DDTL - AP000350.6, SMG1P2 - AC009060.1, TMPRSS2 - ERG, PCNP - MTA3, MRPL11 - MALAT1, REV3L - EYA4
HP-70354	Prostate	Late	TMPRSS2 - ERG	RP13-619I2.2 - PRPF38AP2, TAGLN - SIK3, MRPL11 - MALAT1, WHAMMP3 - PTPRM, SPAST - PSMC1P10, CPEB1-AS1 - SRSF9, EEF1DP3 - CCT2, TAGLN - SIK3, ADSS - CASC18, ASIP - EIF5, AC004076.7 - SMU1, TGM4 - TENM4, CEP295 - RPS4XP18, TMPRSS2 - ERG, RP3-382I10.7 - TSHZ2, TMPRSS2 - ERG, ANKRD13D - LINC00337, MRPL11 - MALAT1, STOX1 - NEAT1, EIF2AP4 - CORO1C, MYO7A - LINC-PINT, MALAT1 - MSI2, ZFP36 - OLFM3, JAKMI…
HP-81359	Prostate	Late	TMPRSS2 - ERG	BMPR1B - LINC01170, NFIA - DHX15, CASKIN1 - ACTG2, DPP6 - ACTR3C, SVOPL - REPS2, TMPRSS2 - ERG, MRPL11 - MALAT1, NCOA5 - EYA2, KMT2C - RFX3, MMP13 - DCUN1D5, PDE6A - CARMN, TAGLN - SIK3, CEP44 - ADARB2, CHRNB2 - ADAMTSL4-AS1
HP-81385	Prostate	Late	TMPRSS2 - ERG	RREB1 - RUVBL2, MRPL11 - MALAT1, AHSA2 - AC005578.3, AC007387.2 - LASP1, RN7SL266P - ANXA13, LINC01290 - CA8, TMPRSS2 - ERG, CACNA1C - PRKD1, MIR3671 - IQCA1, MRPL11 - MALAT1
HP-81387	Prostate	Late	TMPRSS2 - ERG	C3orf20 - PTGES3, MRPL11 - MALAT1, LINC00877 - RYBP, PDE6A - CARMN, TMPRSS2 - ERG, CHD6 - RP4-564F22.5, CSNK1A1 - PDE6A, SGCD - TRPM8, KIF1A - SH3KBP1, ATP5J2P3 - PRUNE2, PLPP1 - IGIP, WWC1 - ZNF691, ZNF300P1 - BAZ2B, MRPL11 - MALAT1, HMBOX1 - LUC7L3, SYT1 - PPP1R12A
HP-81388	Prostate	Late	TMPRSS2 - ERG	TMPRSS2 - ERG, MALAT1 - MIR194-2HG, MRPL11 - MALAT1, GPC6 - ZNF891, NKTR - TRAK1, EPHA1-AS1 - NUP133, MRPL11 - MALAT1, EPHA6 - SH3RF1, MRPL11 - MALAT1, MRPL3 - DIDO1, KHDRBS2 - DNAH8, LIMCH1 - TUSC3, ACTG2 - TERB2, MALAT1 - BACH2
HP-81395	Prostate	Late	TMPRSS2 - ERG	COPB1 - MYH14, NEAT1 - LUZP2, TMPRSS2 - ERG, CTD-2145A24.5 - SRGAP2
HP-82301	Lung	Mets	TMPRSS2 - ERG	MRPL11 - MALAT1, USP10 - PTPRN2, SPAG16 - CCDC144NL, CFAP58 - GRM7, AL132796.1 - HDAC7, LEF1 - PRH1, COX7A2L - CIPC, PPP3CA - BANK1, CTD-2213F21.1 - APOO, TTC6 - LINC01515, AC009414.1 - GRM7, SERP1 - ARHGEF38, AC002386.1 - AC083760.1, CFAP36 - TTC6, TMEFF2 - RPL29P29, GRB10 - SYNE3, MIR4532 - AC140481.8, CTD-2369P2.5 - BDH2P1, KANSL1 - ARL17B, RPS3AP5 - ACSL3, RFPL1S - RAB17, MUSK - ZNF195, AK3 -…
HP-82483	Prostate	Late	TMPRSS2 - ERG	INTS6 - WDFY2, TMPRSS2 - ERG, SLC17A8 - CSGALNACT1, MAPK10 - ENPP1, MIR30D - UIMC1, snoU13 - ACPP, CNOT11 - LINC00299, IRAK2 - G3BP2, LINC00630 - MORF4L2, SCHLAP1 - SI, YWHAG - SOX2-OT, MRPL11 - MALAT1, EEF2K - RCOR1, DAGLA - KLK3, SCARA5 - SOCS5
HP-82486	Prostate	Late	TMPRSS2 - ERG	FER - TMEM132B, DOCK9 - ATAD1, RYBP - SAMMSON, TPT1 - SH3PXD2A, ANTXR2 - WT1-AS, HERC3 - RPSA, ATP6V1G1P7 - IFRD1, AC003090.1 - HNRNPA2B1, SNX27 - AGO1, AP3M1 - ANK3, B3GNTL1 - MORC4, FYTTD1 - PDLIM5, TLK1 - KIAA1671, ITPR1 - AC074011.2, FAM177A1 - PRRC2B, CNGB3 - LINC01297, SOX2-OT - TOMM20, NEAT1 - BASP1, snoU13 - ACPP, IPP - SH3RF1, ASB13 - DMD, LINC01297 - CTD-2314B22.1, ACTG1 - AMY1B, HERC3 …
HP-82496	Prostate	Late	TMPRSS2 - ERG	TMX2-CTNND1 - FGD6, TMEM87B - FAM124B, AFF1 - PKD1L2, MRPL11 - MALAT1, RMND1 - SHROOM3, TMPRSS2 - ERG, BIRC6 - TTC6, NEAT1 - FZD4, LAMB3 - UBE2K, EMB - CTD-2013M15.1, CUX2 - MYRFL, RPL27 - C17orf53, TAGLN - SIK3, MALAT1 - ZRANB3, ARHGAP6 - COMMD10, APPL2 - C8orf46, FOXP2 - CNTN5, SEC24D - HLA-B, PTPRK - LRRC4C, GRHL2 - TUB, ACACA - MIR6082, WASF2 - RIMKLB, RPL9P15 - DAPK1, KAZN - NSUN6, GTF2F2 - …
HP-82736	Prostate	Late	TMPRSS2 - ERG	TMPRSS2 - ERG, MIR3648-2 - pRNA
HP-82739	Prostate	Late	TMPRSS2 - ERG	PLD5 - PMF1-BGLAP, KCNMB2 - MALAT1, LRP2BP - AC073987.2, OTUD3 - TWSG1, SIMC1 - RAB10, PDZRN3 - SPAG17, ROR1 - ELF2, MARCKS - AP000230.1, PLPP1 - LINC01098, USP47 - GALNT18, CD99 - DHRSX, EML1 - ATP9B, EEA1 - TENM3, PPP4R2 - ZBTB44, BDP1 - FAM208A, CARM1 - PTPRG, LINC00976 - INTS10, FIGN - ASTN2, LINC00279 - TPTE2P5, POLR2A - GGA3, STOX1 - NEAT1, POLR2A - CUEDC1, PDLIM3 - FLJ38576, FTH1P8 - SCHLA…
HP-82757	Prostate	Late	TMPRSS2 - ERG	CEP295 - RPS4XP18, RP5-857K21.4 - MTCO1P40, TAGLN - SIK3, MRPL11 - MALAT1, MRPL11 - MALAT1, MUC3A - BX682235.1, SLC25A27 - CLIC5, ANXA2 - UBE2L3, RBPMS - CTD-2010I22.2, ADAM9 - SIRT6, MRPL11 - MALAT1, KANSL1 - CCDC39, VPS45 - BAIAP2L1, COX6A1P3 - RABGAP1, TMPRSS2 - ERG, SMG1P2 - AC009060.1, TRPS1 - PCCA, PARP4P2 - TPTE2P6, MARCH5 - SNX1, LRRC41 - CYP4B1, PDSS2 - LACE1, MRPL11 - MALAT1, FOXP1 - PR…
HP-82779	Prostate	Late	TMPRSS2 - ERG	LRP1B - TBC1D8, MIMT1 - ZNF846, CSGALNACT1 - SLC18A1, PKD1L3 - CLTC, PSKH1 - DPEP1, LPP - NOX4, TMPRSS2 - ERG, MRPL11 - MALAT1, SIL1 - CEBPZOS, NSMCE2 - EIF4B, ABCC4 - OCIAD2, SYT1 - PAWR, TMPRSS2 - ERG, C6orf203 - HAUS1, FAR2 - ATG7, RP3-518E13.2 - PPP3CA, EPB41L1 - EVL, YWHAG - SOX2-OT, PRH1 - CTD-3138F19.1, SLC9A8 - NCOR2, TMPRSS2 - ERG, MRPL11 - MALAT1, TAGLN - SIK3, ESR1 - AKT3, C5orf45 - FO…
HP-82804	Prostate	Late	TMPRSS2 - ERG	NAPB - HS3ST4, DCAF6 - EYS, WRN - CSMD3, DAPL1 - NAV1, SIL1 - FECHP1, TMPRSS2 - ERG, WNK2 - CTA-212A2.4, CTB-57H20.1 - CTC-537E7.1, SYNE2 - INPP5A, BICD1 - SAE1, RPH3AL - ULK4, MRPL11 - MALAT1, WDFY1 - RGL1, LMBR1 - GRK5, C15orf53 - FSIP1, HOXB13 - AC106053.1
HP-82828	Prostate	Late	TMPRSS2 - ERG	AC074019.2 - ZNF131, MALAT1 - IFT81, ANK3 - INTU, ABCA11P - TEP1, CREBRF - LRP2BP, NHSL1 - RCN3, EIF2AK1 - CAMK2G, PLEKHA5 - CTA-292E10.6, FTX - MIR5708, TMPRSS2 - ERG, PRR16 - AC003090.1
HP-82835	Prostate	Late	TMPRSS2 - ERG	RP13-619I2.2 - PRPF38AP2, SOX2-OT - RPL7A, CORO1A - SERPINE1, BMPR1B - RPL21P119, POLR2M - TCF12, MARCKS - AP000230.1, AC002519.6 - PPP2CB, HECTD4 - CABYRP1, GRIA1 - RNVU1-19, FAM177A1 - PRRC2B, OCLN - CTC-340D7.1, SAP18 - RBMXP4, HTR7P1 - AC124057.5, KCND2 - ARID4B, PHTF1 - SLC30A5, KAT7 - TNKS, DLG2 - HSD17B12, OSTC - SNORD3A, TMPRSS2 - ERG, RP1-272L16.1 - TMEM2, TRMT112P4 - APP, EEF1DP3 - CCT2…
HP-82836	Prostate	Late	TMPRSS2 - ERG	TAGLN - SIK3, BGN - C4orf32, LIMCH1 - GCSHP2, HCFC2P1 - FMR1, TCP11L2 - RBM46, THADA - NRXN1, BHLHE40 - GPR173, GPR75-ASB3 - LTBP1, MSH6 - CIB4, SCARA5 - SOCS5, ATAD2B - YWHAQ, RHOA - RP13-619I2.2, NRXN1 - THADA, YWHAQ - LINC01105, PCAT14 - RPL24, KBTBD8 - ABR, MYLK - CPSF7, SERTAD2 - PDZRN3, ASB3 - MIR3681HG, TMPRSS2 - ERG, SVILP1 - SVIL, MARCKS - AP000230.1, LL0XNC01-73E8.1 - ANKH, RP13-619I2.2…
HP-82840	Prostate	Late	TMPRSS2 - ERG	MRPL11 - MALAT1, RXFP1 - PDE4D, GREB1 - LYST, TIPARP - KCNAB1, RGPD6 - CNTNAP2, RMRP - DCHS2, CYP4B1 - UQCRH, NCOA1 - AC002383.2, TMEM45B - AKT3, CAMTA1 - PDE4D, OTUD3 - TWSG1, TMPRSS2 - ERG, KIAA1217 - ITGA1, ACPP - GPATCH2, THBS1 - C15orf53, CNTN5 - ESYT2, MBOAT2 - PPP6R2, CEP295 - RPS4XP18, SMURF2 - COL24A1, LINC01297 - AL050303.11
HP-82843	Prostate	Early/Intermediate	TMPRSS2 - ERG	PROS1 - UHRF2, NIN - ZBTB7C, ING1 - LINC00571, MRPL11 - MALAT1, YWHAQ - PUM2, pRNA - MIR663AHG, MBTD1 - CHRM3, DAGLA - KLK3, TMPRSS2 - ERG, PRRC2A - SH3GL2, TMPRSS2 - ERG, ENO4 - CCSER1, EIF4G3 - CTD-3179P9.1, NUTM2A-AS1 - SLC2A5, SPTBN1 - CCDC8, RBFOX1 - ABCC4, TMC1 - OPHN1, ANKRD28 - ERBB4, WDR27 - AP000350.5
HP-82845	Prostate	Late	TMPRSS2 - ERG	PLD5 - PMF1-BGLAP, GTF2F2 - TPT1, TMPRSS2 - ERG, LINC00969 - CTD-2083E4.6, PDE4D - RAP1BP2, ATP6V1E1 - AC005154.6, EFCAB14-AS1 - CYP4B1, PLPP1 - OSBP, SOX2-OT - GAS5, ANKRD28 - DDX3X, NEAT1 - FZD4, NDE1 - FOPNL, RPL3P4 - GRHL2, TTC6 - IMMP2L, RNLS - CEP89, FGF13 - EIF4G3, PLPP1 - OSBP, UBE2F - MALAT1, AC007387.2 - LASP1, ATP2C2 - EIF2B3, TAGLN - SIK3, VTI1A - DUX4L50, SOX2-OT - TCP1, TMPRSS2 - ER…
HP-82846	Prostate	Early/Intermediate	TMPRSS2 - ERG	WDR74 - BTRC, MGST1 - SUPT16H, CFAP58 - TSPAN14, SUZ12P1 - CTC-542B22.1, CORO1A - SERPINE1, TMPRSS2 - ERG, snoU13 - ACPP, RP13-619I2.2 - PRPF38AP2, CTA-992D9.7 - THRAP3, GUSBP2 - GUSBP3, ARHGAP21 - RIN3, OR7E148P - OR7E47P, DDTL - AP000350.6, TAGLN - SIK3, ZNF652 - HMGN2P6, MAPKBP1 - GNB1, PLB1 - MAML3, NUDT4 - CRADD, SDK1 - ZBTB3, POTEA - POTEF, DMTF1 - MAML3, GLB1L3 - RP5-887A10.1, FKBP5 - MGAR…
HP-82854	Prostate	Early/Intermediate	TMPRSS2 - ERG	ATG4AP1 - IGF1R, MAPK8 - STEAP1B, TOR1AIP1 - AXDND1, TRPS1 - PCCA, CHRDL1 - NIPBL, TMPRSS2 - ERG, ZSCAN30 - NADK, FYTTD1 - PDLIM5, PRH1 - CTD-3138F19.1, PDE6A - CARMN, ASTN2 - AC027119.1, STAMBPL1 - CUL1, RBFOX2 - RN7SL802P, UBR2 - PKD2, SLC38A1 - GYPC, OR2G6 - PXDN, VSTM2A - SLC22A3, MRPL11 - MALAT1, AC092635.1 - PDE4D, RNVU1-7 - LINC01138
HP-82858	Prostate	Late	TMPRSS2 - ERG	SNX29 - VN1R51P, ZC3H11A - ANKRD44, MRPL11 - MALAT1, C12orf75 - FARP1, ZNRD1ASP - HLA-B, MRPL11 - MALAT1, TMPRSS2 - ERG, KLF12 - DLG2
HP-82861	Prostate	Late	TMPRSS2 - ERG	DRC3 - NCOR1, MRPL11 - MALAT1, SERPINE1 - EPHB4, HAPLN2 - IQCG, SPRYD3 - GM2A, TMPRSS2 - ERG
HP-82862	Prostate	Early/Intermediate	TMPRSS2 - ERG	snoU13 - ACPP, IMMP2L - SLC16A14P1, MITF - ACPP, LMCD1-AS1 - ITGAE, TAF1 - ZFX, ZMYND8 - DMKN, LNPEP - C4orf32, LTBP1 - KIF1A, TMPRSS2 - ERG
HP-82865	Prostate	Late	TMPRSS2 - ERG	ETS1 - CTC-591M7.1, TSHZ2 - RP3-382I10.7, USP12 - AC066615.1, LINC01297 - HECTD4, SYCE1L - WWOX, COMMD1 - PCDH7, MAST4 - GRID2, CD81 - FAM99A, OSBPL8 - MALAT1, MRPL11 - MALAT1, MARCKS - AP000230.1, TMPRSS2 - ERG
HP-82866	Prostate	Late	TMPRSS2 - ERG	WAC - DDX17, IFFO2 - SPNS3, PPP2R2A - FAM155A, CAPZB - EIF4G3, TMPRSS2 - ERG, PDE4D - TMEM100
HP-82869	Prostate	Late	TMPRSS2 - ERG	MRPL11 - MALAT1, TRIP12 - NEDD4L, CDK14 - KDF1, MRPL11 - MALAT1, MRPL11 - MALAT1, HSF2BP - RAB3B, TMPRSS2 - ERG, FAM234A - ENPP7P10, RPSAP74 - ACPP, CTC-340A15.2 - RP1-197O17.3
HP-82889	Prostate	Late	TMPRSS2 - ERG, ADNP - TMPRSS2, TMPRSS2 - ADNP	ENO4 - SLC25A36, WDR59 - FAM155A, BCKDHB - EXOC5P1, RNVU1-7 - LINC01138, ROCK1 - AP005901.1, TMPRSS2 - ERG, TMPRSS2 - ERG, GAPDH - ME1, ADNP - TMPRSS2, EZR - PEMT, EIF5 - ASIP, CSGALNACT1 - SLC18A1, ROCK1 - AP005901.1, IGKV1OR2-2 - AP005901.1, EEA1 - TENM3, CLDN7 - CTD-2345M20.2, LRRC37A16P - TEX14, ROCK1 - MIR663AHG, ACPP - GPATCH2, ROCK1 - AP005901.1, MARCH3 - NDRG1, ROCK1 - AP005901.1, PDIA3 -…
HP-69744	Prostate	Early/Intermediate	TMPRSS2 - ERG, MTFR1 - TMPRSS2	TMPRSS2 - ERG, AMD1 - CUX1, TMPRSS2 - ERG, KMT2D - GLIPR1L2, MTFR1 - TMPRSS2, ARHGAP35 - FAM168B, AL133245.2 - LSINCT5, WHSC1 - C14orf37, AC092635.1 - EIF2AK2, PUM2 - RNF150, MRPL11 - MALAT1
HP-82837	Prostate	Late	TMPRSS2 - ERG, MX1 - TMPRSS2	GRIA1 - RNVU1-19, DNM1P46 - AC005154.6, TPTE2P5 - ATP6V1H, ASIP - EIF5, ZFC3H1 - TIAM1, TMPRSS2 - ERG, MX1 - TMPRSS2, GRIA3 - LBR, TMPRSS2 - ERG, HERC3 - SNHG11, TNRC6B - TLE4, PDE8A - PIBF1, LETM2 - ABCC12, SOX2-OT - TCP1, LRRFIP2 - TLN2, PDZRN3 - SPAG17, CAND1 - LPAR1, KAT6B - CEP55, WDR74 - BTRC, TPR - RP5-1011O1.2, ATXN1 - RP1-151F17.2, SERTAD2 - PDZRN3, GTF3C1 - LETM2, FOXP1 - PPP4R2, HERC3 …
HP-81367	Prostate	Late	TMPRSS2 - ERG, MYO1F - ERG, TMPRSS2 - LINC00114	MRPL11 - MALAT1, MIR4801 - AC098617.1, VGLL4 - SETD5, SNX21 - AGPAT4, SMAP1 - FILIP1, RPS23P3 - AC098617.1, MRPL11 - MALAT1, TMPRSS2 - ERG, TSPAN9 - RPS27, MYO1F - ERG, PDE7A - COL22A1, RP3-522D1.2 - GAPDHP33, MRPL11 - MALAT1, SETD7 - KIF26B, ST6GALNAC5 - GS1-115M3.4, PTBP2 - SLC16A1, R3HDM1 - LINC01004, ACPP - CTD-2544M6.1, MRPL11 - MALAT1, SETD5 - VGLL4, TMPRSS2 - ERG, TMPRSS2 - ERG, TMPRSS2 - …
HP-63208	Prostate	Early/Intermediate	TMPRSS2 - ERG, TMPRSS2 - LINC00114	PDE6A - CARMN, ACPP - CTD-2544M6.1, PDE6A - CARMN, SPOP - GSK3B, PPM1A - CRAT40, LINC00535 - ZNF317, FTX - MIR5708, TMPRSS2 - ERG, MIPEP - FADS6, PDE6A - CARMN, FOXA1 - HNRNPC, DES - RP3-377O6.2, MRPL11 - MALAT1, AC159540.1 - TMTC1, TMPRSS2 - LINC00114, CSNK1A1 - PDE6A, PDZRN3 - SPAG17, TMPRSS2 - ERG, TMPRSS2 - ERG, CRADD - NUDT4, CSNK1A1 - PCAT1, CASKIN1 - ACTG2, SFPQP1 - TMEM181, TCF4 - LTBP1, …
HP-81370	Prostate	Late	TMPRSS2 - ERG, TPM1 - TMPRSS2	MRPL11 - MALAT1, ANAPC2 - RBFOX1, MRPL11 - MALAT1, TMPRSS2 - ERG, ZNF568 - TJAP1, MALAT1 - BACH2, DDTL - AP000350.6, CA2 - SLC39A10, MLEC - P2RX7, TPM1 - TMPRSS2, MICAL3 - KCTD1, MALAT1 - POLA2, MRPL11 - MALAT1
HP-82857	Prostate	Late	TMPRSS2 - IVD, TMPRSS2 - ERG	SND1 - MYO3B, TMPRSS2 - IVD, GTF2F2 - TPT1, ZBTB7A - AC098617.1, ENO4 - CCSER1, ATXN1 - VAMP3, TRAV26-1 - CDK8, UBE2Q2P2 - GOLGA6L4, ERBB4 - HPSE2, TMPRSS2 - ERG, NHSL1 - MIR4465, NELL2 - IGFBP4
HP-82831	Prostate	Late	TMPRSS2 - MX1	LRIG1 - ZC3HAV1, MORF4L2 - LL0XNC01-240C2.1, WDR75 - REV1, AC092484.1 - ITGA2, YWHAG - SOX2-OT, AP004550.1 - WDR74, TMPRSS2 - MX1, KMT2C - RPL17P37, CATSPERB - SCFD1, FAM114A1 - GNA14, CORO2A - MRPL18, PAPD4 - LRFN5, SOS1 - HKDC1, LINC01297 - AL050303.11, DLEU2 - NCOA1, STOX1 - NEAT1, CEP295 - RPS4XP18, MRPL11 - MALAT1, PDS5B - SSU72P8, PLPP1 - ZFAND5, LPP - NOX4
HP-63202	Prostate	Early/Intermediate	TPM1 - TMPRSS2	SLC45A3 - SKIL, SETD7 - KIF26B, PLD5 - PMF1-BGLAP, JMJD1C - GTF2F2, MRPL11 - MALAT1, GRIA1 - RNVU1-19, ACTG2 - ERICH6B, SOX2-OT - TCP1, MAP2 - PRUNE2, SLC4A4 - DMXL1, MPHOSPH8 - FOLH1, CPEB3 - PDLIM5, HPD - LUZP2, TCP11L2 - RBM46, TRIO - ARHGEF3, ADSS - CASC18, CALD1 - ST7, DMXL1 - SLC4A4, MRPL11 - MALAT1, RP4-663N10.2 - RBM6, HIST1H2AC - MYLK4, EIF2AP4 - CORO1C, TPM1 - TMPRSS2, MCL1 - STX3, HERP…
HP-80766	Prostate	Late	TPM1 - TMPRSS2	CDH20 - PARP8, MIPEP - FADS6, ANAPC16 - FAM212A, GRHL2 - OR51R1P, SBF2 - RFC3, SERHL2 - KCTD19, SEC24D - HLA-B, TMTC1 - BMPR1B, MPRIP - TTC19, ST6GALNAC4P1 - RAB10, PLEKHA5 - LINC00380, ATP6V1G3 - TCF12, RPL14 - CADPS, PID1 - ZBTB16, HLA-DPB2 - FTX, AJ006995.3 - UBXN2B, CH17-373J23.1 - RNVU1-15, CNTN5 - ESYT2, KRT18P44 - KCTD12, YWHAG - SOX2-OT, SPTLC2 - GCLM, LINC00662 - CEACAM20, GREB1 - KLF11,…
HP-82891	Prostate	Late	TPM1 - TMPRSS2	STX12 - IL15, MALAT1 - BACH2, TPM1 - TMPRSS2, FTX - MIR5708, PCAT14 - RPL24, PDE10A - OLFM2, LINC01297 - AL050303.11, AGO2 - RMND5B, PLD5 - PMF1-BGLAP, MRPL11 - MALAT1
HP-50621	Prostate	Late		FBP2 - PDE11A, LINC00969 - AC090018.1
HP-50623	Prostate	Late		LEKR1 - FAM160A2, MALAT1 - RN7SL478P, PCAT2 - ARHGAP22, SLC16A9 - FAHD2A, SND1 - FABP6, CTD-2215E18.1 - UCK2, MALAT1 - PARD3B, AVPR1A - MIR2052HG, CLEC16A - ZC3H7A, RUNX1 - THRB, HPSE2 - SLC22A8, DHRS3 - NUDT3
HP-63204	Prostate	Early/Intermediate		CALD1 - ST7, LINC00299 - MBOAT2, GRIA1 - RNVU1-19, MRPL11 - MALAT1, RBMX2P4 - FOXP1, MYO7A - LINC-PINT, HECTD4 - PPP2R5B, PPP2R5B - BRAP, MRPL11 - MALAT1, CASKIN1 - ACTG2, OTUD3 - TWSG1, MRPL11 - MALAT1, KCNIP4 - PDZRN3, NFIA - RAB11A, KIF2A - IL1R1, ANKRD28 - LHFPL3-AS2, MTDH - RNF144B, LLNLF-158E9.1 - CYP4F12, MALAT1 - BACH2, AF003626.1 - MAFF, TMEFF2 - WSCD1, ANTXR2 - GPD1L, PDLIM3 - CLDN11, N…
HP-63205	Prostate	Early/Intermediate		RAB11A - SYTL2, THBS1 - C15orf53, CYP20A1 - PARK2, MYO9B - MFAP3, SGSM1 - TTYH3, MALAT1 - DPF2, PRKG1 - KCNJ3, MRPL11 - MALAT1, MYL10 - TRIM56, MRPL11 - MALAT1, THBS1 - C15orf53, GLIS1 - EFNA3, RAPGEF5 - TSPAN8, HS6ST3 - P4HA1, PDE8A - FOXP1, ENO4 - SLC25A36
HP-63211	Prostate	Early/Intermediate		GIPC2 - USP1, GTF3C6 - CMTR1, SLC35G3 - RASSF3, SIAH1 - TERF1, STOX1 - NEAT1, MRPL11 - MALAT1, UBE3C - RNF34, PRPF38AP2 - ZNF970P, PRKCH - KIAA0586, MRPL11 - MALAT1, TAGLN - SIK3, KLK3 - PIK3C2G
HP-64945	Prostate	Early/Intermediate		AC005592.1 - PCCA, CTD-2335O3.3 - MYH10, CXADR - ENTPD1, AFF3 - RNY4, U91319.1 - FEM1A, PPP3CA - AL772307.1, PDS5A - C5orf63, ENTPD1-AS1 - SORBS1, WASF3 - PTMAP5, RFX3-AS1 - SPTBN1, SERTAD2 - PDZRN3, MRPL11 - MALAT1, ENTPD1 - AF212831.2, FBXO25 - CSMD1, DDTL - AP000350.6, ALDH18A1 - MIR99AHG, MRPL11 - MALAT1, PRH1 - CTD-3138F19.1, snoU13 - ACPP, CDH20 - PARP8, NFX1 - CSMD3, UBB - SPATA17, ALDH18A…
HP-64951	Prostate	Early/Intermediate		WRN - FGF13, NEDD4L - GSE1, PDCD11 - TNRC6B, WDR74 - BTRC, SRGAP3 - UNC50, YAP1 - CNOT4, MRPL11 - MALAT1, ARID2 - KCNK12
HP-69716	Prostate	Early/Intermediate		LITAF - TUG1, SKIV2L2 - PRPF8, MXD1 - PCBP1-AS1, AC083949.1 - TXLNG, HSP90B1 - LRRC28
HP-69733	Prostate	Early/Intermediate		PLAUR - TNXB, TRAPPC9 - FNBP1, THSD4 - AC073094.4, SLCO2A1 - CDC73
HP-69739	Prostate	Early/Intermediate		MAP2K4 - RHCG, MIR568 - KAT8
HP-69742	Prostate	Early/Intermediate		WASF3 - RPL29P32, HS1BP3 - PTK2B
HP-69745	Prostate	Early/Intermediate		PATJ - VN1R28P, NCKAP1 - RGN, YTHDF1 - NWD2, ENO4 - SLC25A36, RHPN2 - BARHL2, SEPW1 - DARS2
HP-69747	Prostate	Early/Intermediate		NEDD4L - ADGB
HP-70352	Prostate	Late		-
HP-70353	Prostate	Late		AK6P1 - STX8
HP-70355	Prostate	Late		MARCKS - AP000230.1, PCAT14 - RPL24, HSPA13 - ZFAND1, SERINC5 - NUMB, PDE8B - SHROOM3, TAOK1 - TRPM8, PLB1 - MAML3, MRPL11 - MALAT1, DDTL - AP000350.6, MRPL11 - MALAT1, GREB1 - AC092687.4, AC005336.5 - ETV1, KRT18P44 - KCTD12, PIK3C2A - TCAIM, ADGRG6 - SP1, CEP104 - CRISPLD2, HMGB3P19 - CTDSP2, PTPN14 - MED27, PLD5 - PMF1-BGLAP, MRPL11 - MALAT1, SPSB1 - TBC1D32
HP-70356	Prostate	Late		OXSR1 - CTD-2130F23.1, SLC39A11 - SLC20A2, MEG3 - EVL, SIAH1 - TERF1, AC097721.2 - ZNF19, RELA - PDS5A, CSNK1A1 - PDE6A, PLD5 - PMF1-BGLAP, MRPL11 - MALAT1, KLF10 - DEC1, KDM3B - MLXIPL, NEAT1 - BASP1, MRPL11 - MALAT1, PDE6A - CARMN, ADAR - ZMIZ1-AS1, TUBGCP4 - HNRNPD, NFIC - TPK1, AC005578.3 - AHSA2, TOMM20P3 - PPP4R1, MRPL11 - MALAT1, MRPL11 - MALAT1
HP-80761	Prostate	Late		RAB27B - MRPL50P4
HP-81355	Prostate	Late		PEBP4 - AC011233.2, ACTG2 - TERB2, P4HA3 - CACNA1C, MRPL11 - MALAT1, MALAT1 - DOT1L, RBPMS - ADGRB3, TRPS1 - PCCA, PRKAG2 - TAL2, TGFBR2 - UBE2E2, BMPR1B - PDLIM5, SLC14A2 - FOXN3, MRPL11 - MALAT1, C6orf203 - HAUS1
HP-81356	Lymph Node	Mets		ANKRD36B - RAB3B, ARL17B - KANSL1, RPS6P21 - PRKCQ, TNRC6B - EXT2, BIVM - VPS16, LIFR - RAB3GAP2, PMEPA1 - RHOBTB3, PDE4D - PSPC1, SERINC5 - SACS-AS1, PRH1 - CTD-3138F19.1, DLG2 - RNA5SP472, MRPL11 - MALAT1, TACC2 - UHRF1
HP-81357	Prostate	Late		NEDD4L - PHLPP1, SEC22C - TRAK1, ST6GALNAC4P1 - RAB10, FGF12 - TENM2, OIP5 - ZNF565, NAP1L4 - DPP7, SOX2-OT - TCP1, ZC3H11A - ANKRD44, CTNND1 - ETV1, ARL17B - KANSL1, SDK1 - ZBTB3, LINC01049 - RNF150, UTRN - FOXO3, AC093616.4 - RP4-614C15.3
HP-81366	Prostate	Late		EZR - PEMT, AC005578.3 - AHSA2, MRPL11 - MALAT1, LL0XNC01-240C2.1 - TCEAL3, PDZRN3 - SPAG17, MTDH - RNF144B, TCF12 - NT5DC4, PDXDC2P - SEMA3C, PTPRN2 - TANC1, TRNT1 - RPL21P17, STRN3 - ANO3, RBPMS - EPB41L5, ARL17B - KANSL1, MIR3118-3 - KBTBD12, CHD7 - NKAIN3, TANC1 - RAB2A, SBNO2 - EXTL1, FYTTD1 - PDLIM5, MCTP1 - ELL2, NADSYN1 - ZNF804A, TDRP - MIR4300HG, USP47 - GALNT18
HP-81369	Prostate	Late		FOXA1 - CORIN, PPARA - ARHGEF9, GSN - DUSP10, ATP5J2P3 - PRUNE2, ASCC3 - CLEC7A, MALAT1 - SLC25A45, MRPL11 - MALAT1, SSH2 - CTD-2535I10.1, PRCAT47 - ZNF123P, MRPL11 - MALAT1, MRPL11 - MALAT1, CMKLR1 - TSHZ2, PRKAG2 - TAL2
HP-81382	Prostate	Late		RNA5SP472 - ABCC4, ARL17B - KANSL1, PRH1 - CTD-3138F19.1, GREB1 - PRKCE, CH17-373J23.1 - RNVU1-15, DDTL - AP000350.6, ARHGEF3 - TRIO, WHAMMP3 - PTPRM, TRIP12 - RHBDD1, RP13-619I2.2 - PRPF38AP2, TRIO - ARHGEF3, GRB10 - SYNE3, TRIP11 - TRPC6, HS3ST1 - LDB2, PHF2P2 - BMPR1B, KANSL1 - CCDC39
HP-81384	Prostate	Late		LINC00511 - ST6GAL1, PDE6A - CARMN, MRPL11 - MALAT1, MLLT3 - PTP4A1P4, BOC - TPTE2P6, PDE4D - COX6CP6, LINC01578 - SNX29
HP-81398	Prostate	Early/Intermediate		SLC4A4 - GPC6, ARL5A - ADGRB1, RP13-52K8.1 - SAMD4A, MRPL11 - MALAT1, FKBP5 - IQSEC2, PRB3 - ZNF337, ADAMTSL1 - ZDHHC14, MIR130B - GREB1, MRPL11 - MALAT1, YWHAE - YWHAEP5, MRPL11 - MALAT1, SORBS2 - FLJ38576, CSNK1A1 - EIF4A1P13, PDE6A - CARMN, TAGLN - SIK3, VAT1L - NAALADL2
HP-82298	Lymph Node	Mets		RIOK3 - ST8SIA4, MRPL11 - MALAT1, CECR9 - PLPP1, CECR9 - PLPP1, RAB10 - FGD5, POLB - COX10-AS1, AC097532.2 - ACPP, EZR - PEMT, HPSE2 - SYT17, PLPP1 - ZFAND3, ARL17B - KANSL1, USP54 - ANAPC5, LINC00299 - MBOAT2
HP-82299	Urinary Bladder	Mets		AC007319.1 - RELN, BTBD7P1 - NXPH1, ASF1B - RDX, SGF29 - TRIM77, BRIP1 - DGKB, CYTH1 - LINC01262
HP-82476	Prostate	Late		SLC31A1 - C9orf152, POLK - CHN2, RN7SL636P - ZFPM2, CH17-132F21.5 - LHX3, LDLR - KIF13B, EML6 - S1PR1, XPO1 - MAATS1, ZFP91 - DLG2, PMVK - KCNMB2, GCNT2 - AP002884.2, MAD1L1 - AC090505.6, AC079807.4 - SIM2, CLEC16A - SNX29, NMNAT1P5 - PRKDC, DCTN1 - CDH8, TSHZ2 - FOXP1, STAMBPL1 - AC018359.1, NUBPL - GNGT1, GRIP1 - EFCAB5, GLG1 - SDK1, RAB5CP2 - PTGES3
HP-82479	Prostate	Late		RNF182 - LINC00540, RPS27A - ANKRD28, ARL8B - AC090044.2, INTS9 - OPHN1, PRPF38AP2 - ZNF970P, AGRN - RP5-857K21.4, MRPL11 - MALAT1, UBE2D3 - FAM135B, PGM1 - ALCAM, PUM2 - NEDD4L, ERI3 - KB-173C10.2, MORF4L2 - LL0XNC01-240C2.1, ARHGAP32 - RIPK1, PCCA - BANK1, EIF5 - ASIP, ZBTB20 - NKAIN2, SMAD7 - ABLIM2, TMEM8B - ZC4H2, FBXO11 - RELN, MRPL11 - MALAT1, YWHAE - IL24, SERTAD2 - PDZRN3, MORF4L2 - LL0X…
HP-82482	Prostate	Late		EMB - GALNT13, TENM1 - CDK4PS, FKBP5 - MTOR, CCNG2 - CNOT6L, LINC01297 - AL050303.11, EIF3CL - LRRC49, TACC2 - DDX43P2, NBEA - RNF219, MRPL11 - MALAT1, RP13-104F24.2 - BPTF, FYTTD1 - PDLIM5, AC098617.1 - XCL1, RPPH1 - LRP5, MRPL11 - MALAT1, ACPP - KATNA1, PRKAG2 - TAL2, C4orf45 - TBL1XR1, MALAT1 - HOMER1, MATR3 - LCORL, ABCC4 - KCNIP4, PRKCA - LINC00824, TCAM1P - CDYL2, GK - C8orf86, PRKD2 - POLE…
HP-82491	Prostate	Late		RP5-945F2.2 - AGPAT5P1, SGCD - TRPM8, CRTAP - RN7SL499P, SEMA3D - CNTN6, HDAC9 - UTRN, MTAP - WWP2, YWHAE - CTBP2P1, EIF4G3 - CTD-3179P9.1, CACNA1C - RN7SL802P, PCNX4 - AC084193.1, SHISA9 - SGCZ, ZNF649-AS1 - KIAA1715, NEDD4L - ACYP2, GTF2I - C10orf11
HP-82492	Prostate	Late		MAMDC2 - LMCD1-AS1, PRKDC - MAML2, IRF2 - PIKFYVE, UBE4B - TMEM178B, C8orf37-AS1 - TEX10, WDPCP - LINC01206, MALAT1 - AFF3, SH3RF2 - RP1-191L6.2, ACTP1 - STX18-AS1, NEAT1 - TAS2R5
HP-82494	Prostate	Late		ARHGEF7 - LARS2
HP-82495	Prostate	Late		KLK3 - CTD-2062O1.1, ARID5B - DHRS3, WAC - YME1L1P1, PRELID3BP3 - CYB561
HP-82723	Prostate	Late		DERA - ROR1, AC007387.2 - LASP1, SORCS2 - AFAP1, PDE6A - CARMN, CTD-2118P12.1 - NAP1L4, NDUFB4 - LINC01473, PARVA - GALNT18, ITPR2 - CLDN23, NBAS - PCYT1A, MRPL11 - MALAT1, TCAIM - ATP1A3, SIL1 - CEBPZOS, GALNT1 - PHLPP1, SGCD - TRPM8, PDZRN3 - SPAG17, THBS1 - C15orf53, FNDC3B - GSE1, TTLL5 - ANKRD28, RP5-1027O11.1 - PALLD, AC005578.3 - AHSA2
HP-82732	Prostate	Late		TEAD1 - RNA5SP516, AC068492.1 - LTF, EIF2AP4 - CORO1C, HERC3 - KIAA0907, MRPL11 - MALAT1, TMTC1 - BMPR1B, FGD1 - PIGR, MRPL11 - MALAT1, ENO4 - CCSER1, RNVU1-7 - LINC01138, THBS1 - C15orf53, LINC01088 - PALLD, CDC42BPA - SRGAP1, MCTP1 - ELL2, DDTL - AP000350.6, THBS1 - C15orf53, LIMD1 - LTF, MGST1 - SUPT16H, POTEJ - EXOC4, LIMD1 - LTF
HP-82737	Prostate	Late		VMP1 - MAPK1, PRSS23 - TPBG, GUCY1A3 - OR4A15, ENO4 - SLC25A36, ANKRD28 - DDX3X, MALAT1 - NRXN2, STOX1 - NEAT1, PDE6A - CARMN, TMEM192 - PATJ, PKM - SQSTM1, PDE6A - CARMN, RAD9A - EIF4B, WDFY3 - KMT2A, C4orf45 - TBL1XR1, PLPP1 - PRRX2, PTPRE - NEDD4
HP-82746	Prostate	Late		IRS2 - MIR9-3HG, TLDC2 - GLRXP
HP-82748	Prostate	Late		SOX2-OT - GAS5, FHIT - SPCS3, SLC12A4 - PALLD, RBPMS - ADGRB3, MRPL11 - MALAT1, PRRC2B - KANK4, TLE1 - CYCSP6, ATP6V1G1P7 - IFRD1, PDE6A - CARMN, MALAT1 - LARP1B, MAP3K2 - NAA15, NFIC - TPD52, CTD-2206N4.4 - TAF13, THBS1 - C15orf53, MRPL11 - MALAT1
HP-82749	Prostate	Late		HOOK3 - SERPINB7
HP-82759	Prostate	Late		MALAT1 - DPF2, RBM33 - EFCAB6-AS1, MALAT1 - DPF2, ACPP - ENPP3, AGBL3 - MALAT1, METTL15 - POU6F2
HP-82772	Prostate	Late		MRPL11 - MALAT1, LINC01609 - LRAT, MRPL11 - MALAT1, TAGLN - SIK3, BCL9L - CTD-2290P7.1, CADPS2 - AC083873.4, RERE - RASSF9, SMAD7 - ABLIM2, CCND3P1 - RP1-302D9.1, DDTL - AP000350.6, PELI3 - MALAT1, SENP5 - AC010729.1, NARF - FBXL7, RABEP1 - INPP4B, BPTF - EML5, LINC00685 - MIR1268A, RNGTT - TMEM232
HP-82778	Prostate	Late		ACTR5 - MIR1208, ZNF407 - ZNF496, PLPP1 - PRRX2
HP-82781	Prostate	Late		NEAT1 - STX12, COL14A1 - SLC39A9, CALN1 - ST6GAL2
HP-82784	Prostate	Late		LINC00299 - MBOAT2, TMEM256-PLSCR3 - NAA38, TAGLN - SIK3, SHISA9 - NTN1, LINC01297 - AL050303.11, CSNK1A1 - PDE6A
HP-82786	Prostate	Late		MRPL11 - MALAT1, ST6GALNAC4P1 - RAB10, DAGLA - KLK3, FARP1 - BECN1P2, MALAT1 - TIGD3, IRS1 - CDH13, MRPL11 - MALAT1, ZNF532 - PDHA1, SOX2-OT - RPL7A, ACPP - MITF, NUMA1 - GS1-256O22.5, WDR74 - BTRC, FLNB - BICDL1, PDZRN4 - AP3B1, DDTL - AP000350.6, VPS41 - XCL2, ENO4 - CCSER1, LPP - NOX4, CTD-2001E22.1 - KCNA2, FBXO15 - ARSJ
HP-82787	Prostate	Late		AL591704.9 - CTD-2506J14.1, TGFA - HAP1, TBL1XR1 - ARF1P1
HP-82788	Prostate	Late		CRADD - SOCS2, TNXB - EPC1, NEAT1 - RPSAP74, WDPCP - BCR, CTB-79E8.4 - CTC-308K20.1
HP-82790	Prostate	Late		SRRM2 - CHAT, SMARCA2 - LIN28B, CDRT4 - GABRG2, FAM107B - CYTH3, EIF4G3 - FGF13, HS3ST4 - PARD6G, TLE1 - MIR4272, NFU1 - DACH1, EIF4G1 - AC023115.2
HP-82793	Prostate	Late		UBASH3B - PLEKHA2, GRM5 - METTL8, HERC3 - KIAA0907, PRH1 - CTD-3138F19.1, MARCKS - AP000230.1, RBPMS - CTD-2010I22.2, TEX9 - ZNF280D, PCAT14 - RPL24, MRPL11 - MALAT1, WWP1 - SLC7A13, FAAH2 - CSMD1, MRPL11 - MALAT1
HP-82795	Prostate	Late		AKAP13 - CD81-AS1, AC005944.2 - PIAS4, TSTD3 - AGAP1, ST8SIA1 - ACAA2, SYN3 - NELFB, CUL5 - SUMO2P15, TMX3 - AC142293.3, FBXO42 - EXOC4, ACPP - MITF, TPRA1 - HUWE1, SECISBP2L - TSC22D1, GABRA2 - RN7SL250P, IGFBP5 - ACSL5, ALG5 - ATXN10, SEMA3C - CDK14, BCL9L - CTD-2290P7.1, AC005578.3 - AHSA2, ANKRD28 - PPM1E, ABCC4 - CTD-2532N20.1, ZNF600 - TNK2
HP-82796	Prostate	Late		MRPL11 - MALAT1, SCMH1 - AC002984.2, MRPL11 - MALAT1, PPP3CA - ZP3, CSMD1 - ENPP2, SND1 - BRAF, ARL17B - KANSL1, AFF4 - FARS2, VMP1 - YPEL2, ZRANB2 - RP4-625H18.2, EZR - PEMT, CYB5AP5 - ARAP2, MRPL11 - MALAT1, PAFAH2 - C1GALT1, TPM2 - RP1-78O14.1, NR3C1 - MAN1A2, GOLGA8F - AC069277.2, GMDS - DNAH6, MIR552 - NOTCH2, SENP3 - CASC18, HS3ST4 - PARD6G
HP-82799	Prostate	Late		IMMP1L - SNRPGP19, AC007387.2 - LASP1, GPATCH2 - LSS, NDRG1 - ESRRG, RPL21P11 - ZFAND6, NPR3 - FOCAD, RFC1 - FOXK1, RIC1 - GALT, PRKAG2 - TAL2, KDM4B - MACF1, MCTP1 - ELL2, WNK1 - VPS13C, HPS4 - GTF2I, NAV2 - LDHA, MIR30D - C17orf102, LEF1 - SEMA5A, ALDH1A3 - SFPQ, RMRP - NXPH4, HDLBP - HLA-DOB, NDRG1 - ESRRG, PACSIN2 - NPR1, FN1 - AC012668.2, CLDN7 - CTD-2345M20.2, CEP57L1 - NCEH1, RNA5SP199 - P…
HP-82802	Prostate	Late		PDXDC2P - YAP1P2, AC007106.1 - DHX15, CEP295 - RPS4XP18, CCAR1 - TUBB4BP6, NUCKS1 - AL022578.1
HP-82814	Prostate	Late		SEC24A - AC005178.1, FAM184A - AL590762.7, PRKAG2 - TAL2, SLC30A7 - LLNLR-268E12.1, MRPL11 - MALAT1, NT5C3A - LINC01378, FAM3B - PGM1, LINC00670 - FRMD4A, GAN - RP1-102E24.9, ADAMTS3 - PIK3C2G, LL22NC03-75H12.2 - TBC1D22A
HP-82815	Prostate	Late		MALAT1 - CSGALNACT1, CLEC16A - GSPT1, EPB41L4B - RCC2P3, MMADHC - AC144449.1, AC097721.1 - GREB1, MALAT1 - GPAM, ERBB4 - MALT1, ULK4 - CTNNB1, ARHGAP6 - FRMPD4, CAPZB - PLA2G5, MRPL11 - MALAT1, RCN1 - PRKAA1, IL18BP - CLPB, LRIG1 - CAMKMT, MRPL11 - MALAT1, GRK7 - FAXC, MRPL11 - MALAT1, MRPL11 - MALAT1, FBXL17 - AC018735.1, SH3GL1 - UHRF1, AC008154.5 - PRUNE2, TOMM20P3 - NDUFV2, TM9SF3 - UNC13B, T…
HP-82816	Prostate	Late		EMB - PPP1R1AP2, BCLAF1P2 - PPP1R1AP2, SLC17A5 - CTC-400I9.3, FBXO2 - B3GNTL1P2, PHF11 - GGNBP1, ABCC5 - MRPL1, TRAK1 - LYZL4, NLGN4Y - CABYRP1, IGHV1OR21-1 - ERVK-28, PPP1R1AP2 - BCLAF1P2, DZIP1L - HSDL2, CTBP2P1 - CH17-333M13.2
HP-82817	Prostate	Late		CTB-147N14.7 - FBXL17
HP-82820	Prostate	Late		KAZN - KCNQ3, NUCB2 - EMC1, GRIN2A - KLHL32, RPL12P12 - KCNH5, CCDC85C - AC092198.1, BCLAF1P2 - PPP1R1AP2, LINC01354 - SENP8, LINC01362 - PARD6B, ZBTB20 - DYNC1H1, VCAM1 - MACROD2, PRKY - RNA5SP484, C10orf76 - EXT1, BCLAF1P2 - IGKV2D-40, CERS2 - SPATC1, CAPZA2 - AC096669.3, RP1-45N11.1 - RP5-998N21.3, NR3C2 - AC012075.1, ANAPC7 - PRKG1
HP-82823	Prostate	Late		SYNE1 - UST, PPP4R2 - RUNX1T1, BCL11B - PTCH1, MRPL11 - MALAT1, TBL1XR1 - PDPR, VSIG10 - SRSF11, GOLGA8A - DMD, BPTF - ARL17B, PHF21A - GPR39, STK40 - SUGP2, TSPEAR - IGFBP7, CEBPD - ACTR2
HP-82824	Prostate	Late		NFAT5 - GLG1, KALRN - PUDPP1, PRKD3 - SLC8A1-AS1, ADAM22 - RP4-553F17.1, SLC25A27 - CLIC5, FAM208B - CACNA2D2, ADAMTSL3 - HNRNPLL, NCOA1 - AZIN1, RNU5F-8P - MICALL2, RN7SL709P - STRN4, KCNH6 - BRIP1, SLC31A1 - FN1, RNU5B-1 - RASL12, PDE6A - CARMN, FN1 - AC012668.2, COMMD10 - MGAT5, PPTC7 - CA10, FN1 - AC012668.2, SNX9 - OPRM1, ENO4 - CCSER1, GIGYF1 - MYL10, FN1 - AC012668.2
HP-82827	Prostate	Late		MRPL11 - MALAT1, MALAT1 - IQSEC3, SH3KBP1 - ZNF609, MRPL11 - MALAT1, MALAT1 - CRISP1, FANCI - ABHD2, MRPL11 - MALAT1, RP3-382I10.7 - TSHZ2, PDE4D - RAP1BP2, TBC1D19 - POLE2, EZR - PEMT, KIF13B - DRAIC, TBC1D4 - GCC2, KRT18P44 - KCTD12, CPEB3 - C10orf55, MARCKS - AP000230.1, HSPA13 - ZFAND1, DUSP16 - ACSS2, MRPL11 - MALAT1, DAGLA - KLK3, CPEB3 - VCL, TSHZ2 - RP3-382I10.7
HP-82829	Prostate	Late		AHCYL2 - AC011518.2, CLSTN2 - TRIM56, PREP - GRIK2, MRPL11 - MALAT1, P3H2 - FNDC7, USP34 - ALMS1, MTDH - STXBP5L, KIAA0232 - FUNDC2P2, PRPF38B - P3H2, PDE4D - ADK, TCF12 - TEX9, GYG2 - P3H2, MRPL11 - MALAT1, RP3-382I10.7 - TSHZ2, RPS3AP5 - TPM3P9, SERTAD2 - PDZRN3, BEST1 - NEDD4L, SZRD1 - POM121, ARL17B - KANSL1, BTG3P1 - U1, DLG2 - NCOA6, AUTS2 - ZNF280D
HP-82833	Prostate	Late		-
HP-82842	Prostate	Late		IFNAR2 - NDUFA5P4, PHACTR2 - WRN, GRIP1 - HOXC13-AS, DENND6B - LINC01079, RALGAPA2 - KLK3, COLEC12 - TRIM45, LINC01297 - AL050303.11, NEO1 - ALK, NDUFAF6 - EXPH5, BECN1 - ERI2, PRELID2 - SMIM12, LNPEP - LYPD6, NCAPD3 - NEK1
HP-82844	Prostate	Late		OTUD3 - TWSG1, NEDD4L - WWOX, LLNLF-158E9.1 - CYP4F12, RFX6 - RFFL, GNG5 - RLF, SNRPD3 - SMYD3, CH17-13I23.3 - KMT2C, STK39 - MIATNB, SMAP1 - RFX6, RPL21P11 - ZFAND6, LRP2 - C5orf17, KANSL1L - AC079613.1, THSD4 - SGO1-AS1, KIAA1456 - AC084121.17
HP-82848	Prostate	Late		LINC01297 - AL050303.11, CPQ - CALD1, POTEA - POTEF, TAGLN - SIK3, WDR66 - TTC6, TRIO - ARHGEF3, LLNLF-158E9.1 - CYP4F12, GRIA1 - RNVU1-19, OTUD3 - TWSG1, GAREM1 - ASTN2, PCAT29 - AUTS2, CASC4 - ELL3, THBS1 - C15orf53, ZPLD1 - P3H2, AC005578.3 - AHSA2, GMEB1 - ARHGAP21, KIF1C - TNFRSF19, CEP85L - SLC30A4, FBXW8 - GLUD1, AKAP10 - KIAA1755, AC074391.1 - DPYD, CTB-50L17.16 - ELK4, RND3 - SMARCC1, TH…
HP-82850	Prostate	Early/Intermediate		DPY19L1 - AC004159.1, SOX2-OT - TCP1, AK4 - P4HB, SNX1 - CYLD, TAGLN - SIK3, DEFB122 - VCL, GRIA1 - RNVU1-19, MRPL11 - MALAT1, CD99 - DHRSX, KANSL1 - CCDC39, FAM71BP1 - EZR, KIAA0391 - SEPT7, SEC24D - HLA-B, ZP3 - SERPINE1, PKD2L2 - RPL21P103, DLC1 - COL4A1, UBA6 - UBA6-AS1, RPL7P10 - HDLBP, FAM71BP1 - EZR, MYH9 - RP4-633O19__A.1, MARCKS - AP000230.1, MIR30D - C17orf102, PCDH11Y - HNRNPC, MRPL11 …
HP-82852	Prostate	Late		RP5-1198O20.4 - GGT7, FTX - KIAA0232, MFF - PLCE1, PPP3CA - BACH1, KB-1562D12.1 - SIRT3, PLEKHA3 - FLJ42969, CWF19L2 - OSBPL10, KIF1B - AC016723.4, SDC2 - RIN3, ACSL3 - ZBTB40, INPP5A - ATP8A1, ENO4 - CCSER1, SORBS1 - AC005034.2, CEP295 - ASTN2, PPP4R3A - GRM7
HP-82859	Prostate	Early/Intermediate		RBPMS - CTD-2010I22.2, TNFRSF1B - RFFL, TTC28 - OR5H15, MRPL11 - MALAT1, ERI2 - ARHGAP17, GRIA1 - RNVU1-19, PRRX2 - PLPP1, PDE6A - CARMN, TAGLN - SIK3, ATRN - MIR4462, EBF1 - BTBD2, MITF - ACPP
HP-82860	Prostate	Late		WDR74 - BTRC, AC007387.2 - LASP1, ZNF592 - RP5-972B16.2, MRPL11 - MALAT1, FGF13 - DENND4B, RSF1 - SUMF1
HP-82863	Prostate	Late		SPTLC2 - IQCJ-SCHIP1, HS3ST4 - PARD6G, TMEFF2 - RPL29P29, MRPL11 - MALAT1, HIVEP2 - IL3RA
HP-82867	Prostate	Late		MGAT5 - TERB1, MALAT1 - MAPKAPK5P1, GRM8 - HSBP1L1, SAP30BP - RIN3, MRPL11 - MALAT1, PRKAG2 - TAL2, AK9 - AGBL4
HP-82870	Prostate	Late		GBP4 - KCNN2, AMZ1 - MYL12B, ZNRD1ASP - DAB1, PIAS1 - TM9SF4, PHACTR2 - RP4-809F18.1, TAGLN - SIK3, CNTNAP2 - KIF16B, LSAMP - RP5-984P4.1, DUSP26 - C2CD2, DIAPH2 - ATP6AP1L, GLI3 - ZNF462, ERGIC1 - HIBCH, PDLIM3 - DHRS2
HP-82871	Prostate	Late		MRPL11 - MALAT1, AAK1 - AP000797.2, UBE2L3 - PDE4D
HP-82873	Prostate	Late		HFM1 - EEF1G, RPP40P2 - CPNE8, ENO4 - SLC25A36, PPP1R21 - CKAP4, MRPL11 - MALAT1, TLE4 - GRK5
HP-82874	Prostate	Early/Intermediate		RP3-437C15.1 - SOD2, RBPMS - CTD-2010I22.2, LLNLF-158E9.1 - CYP4F12, MRPL11 - MALAT1, RNVU1-7 - FGF12, MEIS2 - CCNG2, LINC01057 - PTK2, CWC27 - EEF1A1P21, RP5-1027O11.1 - PALLD, THBS1 - C15orf53, CTD-2503O16.4 - AC098617.1, CAND1 - LPAR1
HP-82876	Prostate	Late		SPIRE2 - PLPP3
HP-82878	Prostate	Late		SLC33A1 - SKI, PDE6A - CARMN, MRPL11 - MALAT1, RP5-1027O11.1 - PALLD, AC093106.6 - FNDC3B, PCSK7 - SIK3, DPYD - THSD4, ENO4 - SLC25A36, NHS - CWC22, CRADD - NUDT4, PITPNC1 - PRDM5
HP-82880	Prostate	Late		BTG2 - MYO18A, HDAC9 - ARHGAP23, SLC45A3 - CFAP54, BCAS3 - CSNK1A1, SYN3 - PCDH9
HP-82881	Prostate	Early/Intermediate		snoU13 - ACPP, WDR74 - BTRC, MRPL11 - MALAT1, CASKIN1 - ACTG2, PRPF38AP2 - ZNF970P, GMDS-AS1 - STARD3NL, COBL - MYO5A, FAT3 - EIF4G3, MRPL11 - MALAT1, USP10 - CNTN1
HP-82882	Prostate	Late		TAGLN - SIK3, ENO4 - SLC25A36, UBE2K - VAV1, ENO4 - UPP2, AC104076.2 - KATNAL1
HP-82883	Prostate	Late		ITGA1 - LRRC7
HP-82884	Prostate	Late		FAM13A - LHX5-AS1, RUNX1T1 - BX842568.1, CDC73 - C4orf22
HP-82890	Prostate	Late		CSNK1A1 - PDE6A, ARL17B - KANSL1, MRPL11 - MALAT1, MALAT1 - TIGD3, CORO1A - SERPINE1, WWOX - TLL1, TRMT2B-AS1 - WARS, NLRC5 - MT4, GRIK1 - POT1-AS1, PID1 - RPL7L1P10, RBPMS - ADGRB3, TEAD1 - RNA5SP516, MRPL11 - MALAT1, TAGLN - SIK3, OTUD3 - TWSG1, AC005578.3 - AHSA2, RAD51AP2 - NACA
HP-82892	Prostate	Late		TP53I11 - NDST1, ACPP - GPATCH2, RAD9A - EIF4B, MALAT1 - EDIL3, RMRP - RP13-150K15.1, FGF13 - EIF4G3, POTEA - POTEF, PLD5 - PMF1-BGLAP, DOK6 - MNS1, MIR3118-3 - MIR3118-4, MARCKS - AP000230.1, SRRM4 - ANKRD28, ANKRD28 - DDX3X, AC026202.5 - FAM63B, CLSTN2 - TRIM56, SMOC2 - SLC39A10
HP-82895	Lymph Node	Mets		TOX3 - CTD-3220F14.1, PHLPP1 - CTD-2300H10.2, CEP295 - RPS4XP18, ASH1L - ZIC5, RN7SL700P - MBD5, COX6CP6 - RBM47
HP-82896	Lymph Node	Mets		IL1RAPL2 - SNORD2, USP8 - MAOB, PCNP - MTA3, WDR74 - BTRC
HP-82897	Lymph Node	Mets		OR5AK3P - RNF4, LINC01428 - LSM6, KIF21B - BRI3BP, SERHL2 - ARFGAP3, TSKS - KCND3, TXNRD1 - LINC01362
HP-82899	Lymph Node	Mets		WDR74 - BTRC, KLF14 - AIM1, LARP1B - PPP5D1, CYP4V2 - FAT1, KANSL1 - ARL17B, ALCAM - REV3L, GSN - EED, OTUD7B - IGF1R, PARP4P2 - TPTE2P6, GRIA1 - RNVU1-19, UTRN - CYB5B, BANK1 - KRT18P6

## Sheet: S-Table8
Subject_ID	Ge_Groups	Ge_Tissue	STEAP2	TTC3	PRRC2A	GOLGB1	HLA-A	UTRN	FLNB	TNS1	COL1A2	COL1A1	EIF4G2	KLK2	DDX5	MGP	HDLBP	HSP90AB1	LENG8	SON	COL3A1	MYH11	EIF4B	NUMA1	GOLGA4	PNN	ELK4	HIST1H1E	GNAS	HSPA8	RPL22	PABPC1	RPL13	CCNI	EEF2	EIF3E	FASN	PRRC2C	ASH1L	EIF4A2	RPL27A	COL6A2	NAP1L1	PCBP2	CSDE1	HNRNPH1	RPL8	SLC45A3	EIF4G1
HP-106386	Late	Prostate	missense_variant	frameshift_variant	missense_variant	missense_variant	missense_variant		missense_variant	frameshift_variant				missense_variant		missense_variant															frameshift_variant										frameshift_variant
HP-106387	Late	Prostate	missense_variant		missense_variant	missense_variant	missense_variant				missense_variant			missense_variant		missense_variant							missense_variant			missense_variant	frameshift_variant	frameshift_variant							frameshift_variant			inframe_deletion		frameshift_variant	frameshift_variant			missense_variant
HP-106388	Early/Intermediate	Prostate	missense_variant	frameshift_variant			missense_variant			missense_variant				missense_variant	frameshift_variant	missense_variant		inframe_deletion							frameshift_variant	missense_variant	frameshift_variant				frameshift_variant		frameshift_variant
HP-106389	Late	Prostate	missense_variant		missense_variant		missense_variant		missense_variant	missense_variant				missense_variant																			missense_variant								frameshift_variant
HP-50619	Late	Prostate		stop_gained	missense_variant	stop_gained	missense_variant	stop_gained		missense_variant	missense_variant	missense_variant	inframe_deletion	missense_variant	stop_gained	missense_variant	stop_gained	frameshift_variant	missense_variant	missense_variant	stop_gained	stop_gained	missense_variant	stop_gained	frameshift_variant	missense_variant	frameshift_variant	frameshift_variant				frameshift_variant	inframe_deletion	missense_variant		missense_variant		frameshift_variant		stop_gained	missense_variant				missense_variant	stop_gained	missense_variant	stop_gained	missense_variant
HP-50621	Late	Prostate		frameshift_variant	missense_variant	missense_variant		missense_variant				missense_variant		missense_variant	stop_gained		stop_gained	missense_variant		stop_gained			missense_variant			inframe_deletion						missense_variant					missense_variant					missense_variant	missense_variant	stop_gained				stop_gained
HP-50623	Late	Prostate		missense_variant		frameshift_variant	missense_variant		stop_gained			inframe_deletion	stop_gained		stop_gained		missense_variant		stop_gained	stop_gained	missense_variant		missense_variant	stop_gained		missense_variant	missense_variant				stop_gained	inframe_deletion	inframe_deletion					missense_variant		frameshift_variant	frameshift_variant		missense_variant				frameshift_variant	missense_variant	stop_gained
HP-55669	Mets	Not Otherwise Specified	missense_variant	stop_gained	missense_variant	frameshift_variant		stop_gained	missense_variant		missense_variant	stop_gained	stop_gained	frameshift_variant	stop_gained		stop_gained	inframe_deletion	missense_variant	missense_variant	missense_variant		missense_variant	missense_variant	frameshift_variant	missense_variant	frameshift_variant		missense_variant	missense_variant	frameshift_variant	frameshift_variant	missense_variant	missense_variant	stop_gained	missense_variant	missense_variant		missense_variant	stop_gained			missense_variant	stop_gained	frameshift_variant	missense_variant	frameshift_variant	stop_gained	missense_variant
HP-63199	Early/Intermediate	Prostate	missense_variant	frameshift_variant	missense_variant	inframe_deletion	missense_variant		missense_variant			frameshift_variant		missense_variant									missense_variant		stop_gained			frameshift_variant					frameshift_variant						missense_variant		frameshift_variant					inframe_deletion
HP-63201	Early/Intermediate	Prostate	inframe_deletion	frameshift_variant	missense_variant	stop_gained		frameshift_variant	missense_variant	missense_variant	missense_variant	missense_variant	inframe_deletion	missense_variant	stop_gained		missense_variant	frameshift_variant		missense_variant	missense_variant	stop_gained	missense_variant	stop_gained	frameshift_variant			frameshift_variant		frameshift_variant			frameshift_variant	frameshift_variant		inframe_deletion			missense_variant	stop_gained	frameshift_variant	missense_variant			frameshift_variant	stop_gained	frameshift_variant		frameshift_variant
HP-63202	Early/Intermediate	Prostate	missense_variant		missense_variant	missense_variant	missense_variant						frameshift_variant	missense_variant														frameshift_variant																			missense_variant		frameshift_variant
HP-63204	Early/Intermediate	Prostate	missense_variant	frameshift_variant	missense_variant		missense_variant	frameshift_variant		missense_variant															frameshift_variant						frameshift_variant		frameshift_variant								frameshift_variant						missense_variant
HP-63205	Early/Intermediate	Prostate	inframe_deletion	frameshift_variant	missense_variant		missense_variant	missense_variant	missense_variant	missense_variant	missense_variant			missense_variant				inframe_deletion	missense_variant	missense_variant					stop_gained		missense_variant			frameshift_variant								frameshift_variant				missense_variant		missense_variant				missense_variant
HP-63208	Early/Intermediate	Prostate	missense_variant	frameshift_variant	missense_variant	inframe_deletion	missense_variant		missense_variant	missense_variant		frameshift_variant				missense_variant											frameshift_variant	frameshift_variant
HP-63210	Early/Intermediate	Prostate	missense_variant	frameshift_variant		missense_variant	missense_variant		missense_variant	missense_variant		frameshift_variant				missense_variant										missense_variant		frameshift_variant
HP-63211	Early/Intermediate	Prostate	missense_variant	frameshift_variant	missense_variant	inframe_deletion		frameshift_variant		missense_variant				missense_variant			missense_variant	frameshift_variant		frameshift_variant					frameshift_variant			frameshift_variant					frameshift_variant
HP-64941	Early/Intermediate	Prostate	missense_variant		missense_variant	missense_variant	missense_variant			missense_variant	missense_variant		frameshift_variant			missense_variant		missense_variant	missense_variant		missense_variant		missense_variant		frameshift_variant													frameshift_variant		stop_gained			missense_variant						missense_variant
HP-64945	Early/Intermediate	Prostate			missense_variant				missense_variant	missense_variant		missense_variant	frameshift_variant			missense_variant						missense_variant				missense_variant	frameshift_variant	frameshift_variant			frameshift_variant											missense_variant
HP-64951	Early/Intermediate	Prostate	missense_variant	frameshift_variant	missense_variant	stop_gained	missense_variant	frameshift_variant	inframe_deletion	missense_variant	stop_gained	missense_variant	frameshift_variant	frameshift_variant	stop_gained	missense_variant	stop_gained		missense_variant	missense_variant	missense_variant	stop_gained	stop_gained	stop_gained			frameshift_variant		stop_gained	stop_gained		stop_gained	frameshift_variant	frameshift_variant	frameshift_variant	missense_variant	missense_variant	frameshift_variant		stop_gained	frameshift_variant	missense_variant	missense_variant	stop_gained	stop_gained	stop_gained	stop_gained	frameshift_variant
HP-69716	Early/Intermediate	Prostate	missense_variant	stop_gained	frameshift_variant	stop_gained	missense_variant	frameshift_variant	stop_gained	missense_variant	stop_gained	stop_gained	stop_gained	missense_variant	stop_gained	frameshift_variant	stop_gained	missense_variant	missense_variant	missense_variant	missense_variant	stop_gained	missense_variant	missense_variant	frameshift_variant	missense_variant	missense_variant	frameshift_variant	missense_variant	missense_variant	missense_variant	missense_variant	frameshift_variant	missense_variant	frameshift_variant	stop_gained	missense_variant	frameshift_variant	missense_variant		frameshift_variant	missense_variant	frameshift_variant		missense_variant	stop_gained	stop_gained	missense_variant	missense_variant
HP-69733	Early/Intermediate	Prostate	missense_variant	stop_gained				missense_variant	missense_variant		missense_variant	missense_variant	stop_gained		missense_variant		missense_variant	missense_variant			missense_variant	stop_gained	missense_variant	missense_variant	frameshift_variant	missense_variant	frameshift_variant		missense_variant	stop_gained		missense_variant			stop_gained	missense_variant	missense_variant		missense_variant	missense_variant			missense_variant	missense_variant	missense_variant			stop_gained
HP-69739	Early/Intermediate	Prostate	missense_variant	frameshift_variant		stop_gained	missense_variant	stop_gained	missense_variant	missense_variant	stop_gained	stop_gained	stop_gained	frameshift_variant	missense_variant		inframe_deletion	missense_variant	missense_variant			stop_gained	missense_variant	missense_variant	missense_variant	stop_gained	missense_variant			missense_variant		stop_gained		missense_variant	frameshift_variant	missense_variant				missense_variant	missense_variant	stop_gained	frameshift_variant	missense_variant	missense_variant	stop_gained	missense_variant	stop_gained	missense_variant
HP-69742	Early/Intermediate	Prostate	missense_variant	frameshift_variant	missense_variant			missense_variant	frameshift_variant		missense_variant	missense_variant	missense_variant		inframe_deletion	missense_variant	missense_variant		missense_variant		missense_variant	frameshift_variant	missense_variant	missense_variant		missense_variant		frameshift_variant	stop_gained	missense_variant		stop_gained		missense_variant	frameshift_variant	missense_variant			missense_variant		missense_variant	frameshift_variant		missense_variant	missense_variant	missense_variant	missense_variant	missense_variant
HP-69744	Early/Intermediate	Prostate	missense_variant	stop_gained	missense_variant	stop_gained		missense_variant	frameshift_variant	missense_variant	missense_variant	stop_gained	inframe_deletion		missense_variant	missense_variant	stop_gained	inframe_deletion	stop_gained	frameshift_variant	missense_variant	stop_gained	missense_variant	stop_gained	missense_variant	stop_gained	missense_variant		missense_variant	stop_gained		frameshift_variant		missense_variant	missense_variant	stop_gained	missense_variant	frameshift_variant	missense_variant	frameshift_variant		missense_variant	missense_variant	missense_variant	missense_variant	missense_variant		stop_gained	missense_variant
HP-69745	Early/Intermediate	Prostate	missense_variant	missense_variant	missense_variant	missense_variant		stop_gained		missense_variant	missense_variant	missense_variant	stop_gained	frameshift_variant	missense_variant		stop_gained	inframe_deletion	missense_variant	stop_gained	stop_gained	stop_gained	stop_gained	missense_variant	stop_gained	missense_variant	frameshift_variant		missense_variant	stop_gained		stop_gained			missense_variant	stop_gained	missense_variant			frameshift_variant			frameshift_variant	stop_gained	frameshift_variant	stop_gained		stop_gained	stop_gained
HP-69746	Early/Intermediate	Prostate	missense_variant	stop_gained	stop_gained	stop_gained		frameshift_variant	missense_variant	frameshift_variant	missense_variant	missense_variant	inframe_deletion	frameshift_variant	stop_gained	missense_variant	missense_variant	stop_gained	missense_variant	missense_variant	missense_variant	stop_gained	stop_gained	stop_gained		stop_gained	frameshift_variant	frameshift_variant	frameshift_variant	stop_gained		missense_variant		missense_variant	stop_gained	missense_variant	missense_variant			stop_gained	inframe_deletion	stop_gained	missense_variant	stop_gained	frameshift_variant	missense_variant	missense_variant	stop_gained	missense_variant
HP-69747	Early/Intermediate	Prostate	missense_variant	missense_variant	missense_variant	stop_gained	missense_variant	stop_gained	missense_variant	missense_variant	stop_gained	stop_gained	stop_gained	frameshift_variant	stop_gained		frameshift_variant	inframe_deletion	missense_variant	missense_variant	stop_gained	stop_gained	stop_gained	missense_variant	missense_variant	missense_variant	missense_variant	frameshift_variant	inframe_deletion	stop_gained	missense_variant	stop_gained		missense_variant	missense_variant	missense_variant	missense_variant			stop_gained		stop_gained	missense_variant	stop_gained	missense_variant	stop_gained	missense_variant	stop_gained	stop_gained
HP-69750	Early/Intermediate	Prostate	stop_gained	stop_gained		missense_variant	missense_variant	stop_gained	stop_gained	missense_variant	stop_gained	missense_variant	missense_variant	frameshift_variant	missense_variant		stop_gained	frameshift_variant	stop_gained	stop_gained	missense_variant	stop_gained	missense_variant	stop_gained	frameshift_variant	missense_variant	missense_variant		stop_gained	stop_gained	frameshift_variant	missense_variant	frameshift_variant		missense_variant	stop_gained	missense_variant	frameshift_variant	missense_variant	stop_gained	frameshift_variant	missense_variant	missense_variant	missense_variant	missense_variant		missense_variant	stop_gained	missense_variant
HP-70352	Late	Prostate	missense_variant	frameshift_variant	missense_variant			frameshift_variant		missense_variant	missense_variant	stop_gained	stop_gained	missense_variant		missense_variant		missense_variant		missense_variant	missense_variant		stop_gained	stop_gained		stop_gained				stop_gained		stop_gained				missense_variant		missense_variant				frameshift_variant		missense_variant	missense_variant				missense_variant
HP-70353	Late	Prostate		frameshift_variant		stop_gained		missense_variant		missense_variant	frameshift_variant	missense_variant	missense_variant	frameshift_variant			missense_variant		missense_variant		missense_variant	stop_gained	stop_gained				frameshift_variant		inframe_deletion	missense_variant		missense_variant			frameshift_variant		missense_variant									stop_gained	missense_variant	frameshift_variant
HP-70354	Late	Prostate			missense_variant	frameshift_variant			missense_variant	missense_variant						missense_variant				frameshift_variant		inframe_deletion					frameshift_variant
HP-70355	Late	Prostate	missense_variant	frameshift_variant	missense_variant		missense_variant	frameshift_variant																							frameshift_variant										frameshift_variant							missense_variant
HP-70356	Late	Prostate	missense_variant	frameshift_variant	frameshift_variant	stop_gained	missense_variant				inframe_deletion						frameshift_variant								frameshift_variant						frameshift_variant			missense_variant				stop_gained			frameshift_variant		missense_variant					missense_variant
HP-80761	Late	Prostate	frameshift_variant	missense_variant	missense_variant	frameshift_variant		missense_variant	missense_variant		stop_gained	missense_variant	stop_gained		missense_variant	missense_variant	stop_gained		missense_variant	missense_variant		stop_gained	missense_variant			missense_variant			missense_variant	stop_gained		stop_gained	missense_variant	missense_variant	frameshift_variant	missense_variant			missense_variant	stop_gained	frameshift_variant				missense_variant		missense_variant	stop_gained
HP-80766	Late	Prostate	missense_variant			missense_variant	missense_variant	missense_variant	missense_variant	missense_variant		stop_gained				missense_variant	inframe_deletion		inframe_deletion		frameshift_variant		stop_gained		frameshift_variant		frameshift_variant		inframe_deletion		frameshift_variant			frameshift_variant			missense_variant						missense_variant				frameshift_variant		stop_gained
HP-81353	Late	Prostate	missense_variant	frameshift_variant	missense_variant				missense_variant	missense_variant	missense_variant	frameshift_variant				missense_variant					missense_variant			missense_variant		missense_variant		frameshift_variant					frameshift_variant	frameshift_variant			missense_variant	missense_variant	missense_variant		frameshift_variant	missense_variant				inframe_deletion
HP-81355	Late	Prostate	stop_gained	stop_gained	missense_variant	stop_gained	missense_variant	stop_gained	missense_variant	missense_variant	inframe_deletion		stop_gained	frameshift_variant		missense_variant		inframe_deletion			missense_variant		inframe_deletion		stop_gained	missense_variant	missense_variant		frameshift_variant				frameshift_variant	missense_variant	frameshift_variant	missense_variant	missense_variant		missense_variant	frameshift_variant	frameshift_variant					stop_gained
HP-81356	Mets	Lymph Node	missense_variant		stop_gained	missense_variant	missense_variant	frameshift_variant	missense_variant	missense_variant	missense_variant	missense_variant	missense_variant	frameshift_variant	missense_variant	missense_variant		missense_variant	missense_variant	missense_variant	missense_variant	inframe_deletion	frameshift_variant	frameshift_variant	frameshift_variant	stop_gained		frameshift_variant				stop_gained	frameshift_variant		frameshift_variant	missense_variant		missense_variant			frameshift_variant
HP-81357	Late	Prostate	missense_variant	frameshift_variant	missense_variant	inframe_deletion	missense_variant		missense_variant	missense_variant	missense_variant	missense_variant		missense_variant				missense_variant	missense_variant	missense_variant	frameshift_variant	frameshift_variant	missense_variant		frameshift_variant		frameshift_variant	frameshift_variant	inframe_deletion					stop_gained	frameshift_variant		frameshift_variant				frameshift_variant
HP-81359	Late	Prostate	stop_gained	stop_gained	missense_variant	stop_gained	missense_variant	frameshift_variant	frameshift_variant		missense_variant	missense_variant	stop_gained	missense_variant	stop_gained	missense_variant	missense_variant	missense_variant	missense_variant		missense_variant	frameshift_variant	missense_variant	stop_gained	frameshift_variant	missense_variant		frameshift_variant	missense_variant	missense_variant	missense_variant			missense_variant			missense_variant		missense_variant	missense_variant	frameshift_variant	missense_variant	missense_variant	missense_variant		stop_gained	frameshift_variant	missense_variant	missense_variant
HP-81366	Late	Prostate		frameshift_variant	missense_variant					missense_variant						missense_variant		missense_variant				inframe_deletion				missense_variant	frameshift_variant	frameshift_variant										frameshift_variant
HP-81367	Late	Prostate	missense_variant	frameshift_variant		missense_variant	missense_variant		missense_variant	missense_variant	missense_variant	stop_gained				missense_variant		missense_variant	missense_variant	frameshift_variant		frameshift_variant	missense_variant		frameshift_variant		frameshift_variant				frameshift_variant
HP-81369	Late	Prostate	stop_gained	stop_gained	stop_gained	frameshift_variant		stop_gained	frameshift_variant	missense_variant	stop_gained	stop_gained	stop_gained	frameshift_variant	inframe_deletion		stop_gained	frameshift_variant	stop_gained	frameshift_variant	missense_variant	stop_gained	inframe_deletion	stop_gained	frameshift_variant	missense_variant	frameshift_variant		stop_gained	stop_gained		frameshift_variant	frameshift_variant	missense_variant		stop_gained	missense_variant	stop_gained	missense_variant	missense_variant	frameshift_variant	missense_variant	frameshift_variant	missense_variant	frameshift_variant		missense_variant	missense_variant	missense_variant
HP-81370	Late	Prostate	missense_variant	stop_gained	missense_variant	stop_gained	missense_variant	missense_variant	missense_variant	missense_variant	frameshift_variant	stop_gained	inframe_deletion	frameshift_variant	stop_gained		inframe_deletion	missense_variant	missense_variant	missense_variant	stop_gained		missense_variant		stop_gained		missense_variant	frameshift_variant	missense_variant	missense_variant			frameshift_variant		frameshift_variant	stop_gained	missense_variant		missense_variant	missense_variant		missense_variant	missense_variant	missense_variant	missense_variant	stop_gained			missense_variant
HP-81382	Late	Prostate	missense_variant	missense_variant	missense_variant	stop_gained		missense_variant	missense_variant	missense_variant	missense_variant	missense_variant	missense_variant		missense_variant	missense_variant		stop_gained	missense_variant		stop_gained		frameshift_variant	missense_variant	frameshift_variant		missense_variant		stop_gained	missense_variant						missense_variant			stop_gained			stop_gained	missense_variant		missense_variant				missense_variant
HP-81384	Late	Prostate		stop_gained	stop_gained	stop_gained	missense_variant	missense_variant	missense_variant	missense_variant	stop_gained	stop_gained	missense_variant		missense_variant		stop_gained	missense_variant	missense_variant	stop_gained	stop_gained	stop_gained	inframe_deletion	missense_variant	frameshift_variant	stop_gained	frameshift_variant	frameshift_variant	inframe_deletion	stop_gained	frameshift_variant	missense_variant	frameshift_variant	missense_variant	missense_variant	stop_gained	missense_variant	missense_variant	missense_variant	missense_variant		missense_variant	missense_variant		stop_gained	stop_gained	missense_variant	missense_variant	missense_variant
HP-81385	Late	Prostate		frameshift_variant	missense_variant	missense_variant	missense_variant	stop_gained	missense_variant	missense_variant		missense_variant				missense_variant	frameshift_variant	missense_variant					inframe_deletion	missense_variant		missense_variant		frameshift_variant		frameshift_variant		frameshift_variant							missense_variant						missense_variant
HP-81387	Late	Prostate		frameshift_variant	missense_variant			stop_gained	inframe_deletion		frameshift_variant	missense_variant	missense_variant				missense_variant		missense_variant	missense_variant	missense_variant		missense_variant					frameshift_variant	missense_variant	stop_gained					missense_variant		missense_variant		stop_gained	missense_variant	frameshift_variant				missense_variant		frameshift_variant	missense_variant	frameshift_variant
HP-81388	Late	Prostate	missense_variant	frameshift_variant		inframe_deletion	missense_variant	frameshift_variant		missense_variant		stop_gained			missense_variant	missense_variant		missense_variant	missense_variant	frameshift_variant	missense_variant	stop_gained		stop_gained	frameshift_variant	missense_variant				frameshift_variant	frameshift_variant				frameshift_variant				stop_gained	frameshift_variant					stop_gained	inframe_deletion
HP-81391	Late	Prostate	stop_gained	missense_variant	stop_gained	frameshift_variant	missense_variant	stop_gained	missense_variant	missense_variant	stop_gained	stop_gained	stop_gained	frameshift_variant	stop_gained		stop_gained	inframe_deletion	missense_variant	missense_variant	frameshift_variant	missense_variant		frameshift_variant		inframe_deletion	frameshift_variant		inframe_deletion		frameshift_variant	missense_variant	frameshift_variant	missense_variant	stop_gained	stop_gained	missense_variant	frameshift_variant	missense_variant				missense_variant	missense_variant	missense_variant	stop_gained	missense_variant		missense_variant
HP-81393	Late	Prostate	missense_variant	frameshift_variant	missense_variant	missense_variant	missense_variant	stop_gained	missense_variant	missense_variant	missense_variant	stop_gained	missense_variant	missense_variant	missense_variant		inframe_deletion	missense_variant	stop_gained	missense_variant	missense_variant	stop_gained	missense_variant	missense_variant	frameshift_variant		missense_variant	frameshift_variant	missense_variant			stop_gained		frameshift_variant	missense_variant			frameshift_variant	frameshift_variant			frameshift_variant		missense_variant	missense_variant		missense_variant	missense_variant	missense_variant
HP-81395	Late	Prostate	missense_variant	stop_gained		inframe_deletion	missense_variant	missense_variant	stop_gained	missense_variant	missense_variant	missense_variant	frameshift_variant	missense_variant	stop_gained	missense_variant	stop_gained	missense_variant	stop_gained	missense_variant		stop_gained	stop_gained	stop_gained		missense_variant			missense_variant	stop_gained		frameshift_variant		missense_variant	stop_gained		missense_variant		stop_gained	missense_variant		missense_variant	missense_variant		missense_variant	stop_gained	stop_gained	missense_variant	missense_variant
HP-81398	Early/Intermediate	Prostate		stop_gained	missense_variant		missense_variant	stop_gained	missense_variant	missense_variant	frameshift_variant	missense_variant	missense_variant			missense_variant	missense_variant			missense_variant		frameshift_variant	stop_gained	frameshift_variant				frameshift_variant			frameshift_variant	stop_gained					missense_variant
HP-82298	Mets	Lymph Node	missense_variant	frameshift_variant				stop_gained	frameshift_variant	missense_variant	missense_variant		missense_variant	missense_variant	missense_variant	missense_variant		frameshift_variant	missense_variant	stop_gained							frameshift_variant															missense_variant				stop_gained
HP-82299	Mets	Urinary Bladder		missense_variant		missense_variant		frameshift_variant	missense_variant			missense_variant	inframe_deletion		inframe_deletion				missense_variant						frameshift_variant	missense_variant				missense_variant		stop_gained		missense_variant	frameshift_variant			frameshift_variant	stop_gained	missense_variant				missense_variant		stop_gained	frameshift_variant
HP-82301	Mets	Lung	missense_variant	frameshift_variant	missense_variant	missense_variant	missense_variant	missense_variant	missense_variant					missense_variant	frameshift_variant													frameshift_variant			frameshift_variant		frameshift_variant									missense_variant
HP-82476	Late	Prostate	missense_variant		missense_variant			missense_variant			stop_gained		missense_variant	missense_variant				inframe_deletion			frameshift_variant	missense_variant		missense_variant					missense_variant			stop_gained			frameshift_variant	missense_variant						missense_variant		stop_gained
HP-82479	Late	Prostate	missense_variant	frameshift_variant	missense_variant	frameshift_variant	missense_variant		missense_variant	frameshift_variant						missense_variant				frameshift_variant								frameshift_variant			frameshift_variant		frameshift_variant							missense_variant	frameshift_variant
HP-82482	Late	Prostate	missense_variant				missense_variant		frameshift_variant			frameshift_variant		missense_variant	missense_variant	missense_variant		inframe_deletion	missense_variant	stop_gained		frameshift_variant		missense_variant		missense_variant	frameshift_variant								inframe_deletion					frameshift_variant
HP-82483	Late	Prostate	missense_variant			missense_variant	missense_variant		missense_variant	missense_variant				missense_variant	inframe_deletion												missense_variant	frameshift_variant		missense_variant	frameshift_variant							frameshift_variant
HP-82486	Late	Prostate	missense_variant	frameshift_variant	missense_variant	missense_variant	missense_variant		missense_variant	missense_variant						missense_variant												frameshift_variant			frameshift_variant		frameshift_variant								frameshift_variant
HP-82491	Late	Prostate	missense_variant	missense_variant	frameshift_variant	missense_variant	missense_variant		frameshift_variant	frameshift_variant	missense_variant	stop_gained	stop_gained		frameshift_variant	missense_variant			inframe_deletion	frameshift_variant	missense_variant			frameshift_variant	frameshift_variant				inframe_deletion		frameshift_variant	inframe_deletion	frameshift_variant	missense_variant					missense_variant	frameshift_variant		missense_variant		stop_gained	missense_variant	missense_variant	missense_variant		missense_variant
HP-82492	Late	Prostate	missense_variant	stop_gained	missense_variant	missense_variant	missense_variant	missense_variant	missense_variant	missense_variant	missense_variant		inframe_deletion		stop_gained	missense_variant	inframe_deletion	inframe_deletion	missense_variant		stop_gained	missense_variant			missense_variant		frameshift_variant	frameshift_variant		missense_variant	frameshift_variant		frameshift_variant		missense_variant						frameshift_variant	missense_variant				stop_gained		frameshift_variant	frameshift_variant
HP-82494	Late	Prostate	stop_gained				missense_variant										missense_variant				missense_variant	frameshift_variant							missense_variant	stop_gained	missense_variant				frameshift_variant	stop_gained					missense_variant	missense_variant	missense_variant	stop_gained
HP-82495	Late	Prostate	missense_variant	missense_variant			missense_variant	missense_variant	missense_variant		stop_gained	missense_variant	frameshift_variant	missense_variant	missense_variant				missense_variant	frameshift_variant		missense_variant	inframe_deletion			inframe_deletion	missense_variant		inframe_deletion	missense_variant	frameshift_variant	frameshift_variant	frameshift_variant	missense_variant	frameshift_variant	inframe_deletion	missense_variant	stop_gained					frameshift_variant					frameshift_variant
HP-82496	Late	Prostate	missense_variant	frameshift_variant	missense_variant		missense_variant	frameshift_variant	missense_variant	missense_variant	inframe_deletion	stop_gained			frameshift_variant	missense_variant		inframe_deletion					stop_gained			missense_variant			missense_variant						frameshift_variant			frameshift_variant						stop_gained			missense_variant
HP-82723	Late	Prostate		frameshift_variant		missense_variant	missense_variant		missense_variant	missense_variant				missense_variant		missense_variant												frameshift_variant		frameshift_variant	frameshift_variant						missense_variant									inframe_deletion
HP-82732	Late	Prostate	missense_variant	frameshift_variant		missense_variant	missense_variant		missense_variant	missense_variant				missense_variant	missense_variant	missense_variant			missense_variant					missense_variant									frameshift_variant				missense_variant	frameshift_variant	missense_variant		frameshift_variant
HP-82736	Late	Prostate	missense_variant	frameshift_variant	missense_variant		missense_variant	missense_variant	missense_variant		missense_variant			missense_variant	missense_variant		missense_variant		stop_gained	missense_variant	missense_variant	inframe_deletion		stop_gained			frameshift_variant	frameshift_variant	missense_variant	missense_variant	stop_gained							stop_gained		stop_gained	frameshift_variant				missense_variant	inframe_deletion		stop_gained	frameshift_variant
HP-82737	Late	Prostate	missense_variant	frameshift_variant	stop_gained	inframe_deletion		missense_variant			missense_variant					missense_variant		inframe_deletion						missense_variant			missense_variant										missense_variant						missense_variant				missense_variant	missense_variant
HP-82739	Late	Prostate	missense_variant				missense_variant		missense_variant	missense_variant					missense_variant	missense_variant		inframe_deletion		inframe_deletion								frameshift_variant					frameshift_variant								frameshift_variant
HP-82746	Late	Prostate	missense_variant	missense_variant	missense_variant		missense_variant	frameshift_variant	missense_variant	missense_variant	stop_gained	missense_variant	stop_gained	missense_variant	missense_variant	missense_variant	missense_variant	missense_variant	stop_gained	missense_variant	frameshift_variant	missense_variant	missense_variant	missense_variant		stop_gained			missense_variant	stop_gained		stop_gained	frameshift_variant	frameshift_variant		frameshift_variant		stop_gained	missense_variant	stop_gained	missense_variant		missense_variant	stop_gained	missense_variant	inframe_deletion		missense_variant
HP-82748	Late	Prostate	missense_variant	stop_gained	missense_variant	inframe_deletion	missense_variant	missense_variant	missense_variant	missense_variant	frameshift_variant	frameshift_variant		missense_variant	missense_variant		missense_variant	missense_variant						missense_variant	missense_variant	missense_variant	missense_variant		stop_gained	missense_variant			frameshift_variant				missense_variant	inframe_deletion	missense_variant					missense_variant		stop_gained			missense_variant
HP-82749	Late	Prostate	stop_gained	stop_gained	missense_variant	stop_gained	missense_variant	stop_gained	missense_variant		inframe_deletion	missense_variant	missense_variant	frameshift_variant	stop_gained	missense_variant	frameshift_variant	missense_variant	missense_variant	frameshift_variant	missense_variant	stop_gained	missense_variant	missense_variant	frameshift_variant	missense_variant	missense_variant	frameshift_variant	stop_gained	frameshift_variant	missense_variant	missense_variant		frameshift_variant	frameshift_variant	stop_gained	missense_variant	frameshift_variant		missense_variant		missense_variant		missense_variant	missense_variant	stop_gained	missense_variant		frameshift_variant
HP-82757	Late	Prostate	missense_variant				missense_variant			missense_variant	missense_variant									inframe_deletion					frameshift_variant					frameshift_variant				frameshift_variant			missense_variant		missense_variant									missense_variant
HP-82759	Late	Prostate	missense_variant	stop_gained	missense_variant	frameshift_variant		stop_gained					missense_variant	frameshift_variant			missense_variant	missense_variant			missense_variant	missense_variant	missense_variant	stop_gained	frameshift_variant	stop_gained	missense_variant		missense_variant	stop_gained		stop_gained	frameshift_variant	missense_variant	missense_variant	stop_gained			missense_variant	missense_variant			missense_variant	stop_gained	stop_gained	stop_gained	missense_variant	stop_gained
HP-82772	Late	Prostate	missense_variant	stop_gained		stop_gained	missense_variant	missense_variant	missense_variant				missense_variant	missense_variant	frameshift_variant		inframe_deletion						stop_gained	stop_gained			missense_variant				frameshift_variant			missense_variant				inframe_deletion	frameshift_variant				missense_variant	missense_variant	missense_variant	missense_variant
HP-82778	Late	Prostate	missense_variant	frameshift_variant	missense_variant	stop_gained		frameshift_variant	missense_variant	missense_variant							missense_variant	frameshift_variant	missense_variant	missense_variant		missense_variant	missense_variant	stop_gained		missense_variant	frameshift_variant		missense_variant					frameshift_variant	missense_variant	stop_gained		missense_variant						missense_variant	missense_variant				frameshift_variant
HP-82779	Late	Prostate	missense_variant	frameshift_variant		missense_variant	missense_variant	stop_gained		missense_variant				missense_variant				inframe_deletion										frameshift_variant			frameshift_variant
HP-82781	Late	Prostate			missense_variant		missense_variant				missense_variant	frameshift_variant				missense_variant			stop_gained	frameshift_variant	missense_variant		stop_gained	missense_variant			missense_variant			missense_variant		stop_gained	frameshift_variant		missense_variant		missense_variant					missense_variant	missense_variant	missense_variant		stop_gained	frameshift_variant	stop_gained
HP-82784	Late	Prostate	frameshift_variant	missense_variant		missense_variant	missense_variant	frameshift_variant	frameshift_variant	missense_variant	missense_variant	stop_gained		missense_variant				missense_variant			stop_gained			missense_variant	frameshift_variant	missense_variant	frameshift_variant	frameshift_variant	missense_variant													missense_variant	frameshift_variant
HP-82786	Late	Prostate		stop_gained	missense_variant	missense_variant	missense_variant	missense_variant	missense_variant	missense_variant							frameshift_variant		missense_variant		missense_variant																				frameshift_variant	missense_variant		missense_variant			missense_variant
HP-82787	Late	Prostate	missense_variant	frameshift_variant		stop_gained	missense_variant	stop_gained	missense_variant	missense_variant	missense_variant	frameshift_variant	missense_variant		stop_gained		missense_variant	missense_variant	stop_gained			inframe_deletion	inframe_deletion	stop_gained	stop_gained	missense_variant	missense_variant		missense_variant			stop_gained	frameshift_variant	missense_variant	missense_variant	inframe_deletion	frameshift_variant								missense_variant				missense_variant
HP-82788	Late	Prostate		frameshift_variant			missense_variant	frameshift_variant			missense_variant	missense_variant	missense_variant			missense_variant			stop_gained	missense_variant	frameshift_variant	frameshift_variant	missense_variant	stop_gained		stop_gained			stop_gained	stop_gained		inframe_deletion				stop_gained	missense_variant			missense_variant		missense_variant	missense_variant	missense_variant	missense_variant		missense_variant
HP-82790	Late	Prostate	missense_variant	frameshift_variant	stop_gained	stop_gained	missense_variant	stop_gained	missense_variant	missense_variant	stop_gained	stop_gained	frameshift_variant	missense_variant	frameshift_variant	missense_variant	frameshift_variant	stop_gained	missense_variant	missense_variant	missense_variant	stop_gained	missense_variant	stop_gained	frameshift_variant	missense_variant			stop_gained	stop_gained		frameshift_variant		missense_variant	frameshift_variant	frameshift_variant	missense_variant	frameshift_variant	stop_gained			missense_variant	frameshift_variant	missense_variant	missense_variant	stop_gained
HP-82793	Late	Prostate	missense_variant	missense_variant	missense_variant	frameshift_variant	missense_variant	frameshift_variant		missense_variant	missense_variant	stop_gained	stop_gained	missense_variant	stop_gained	frameshift_variant	stop_gained	inframe_deletion	missense_variant	missense_variant	frameshift_variant	missense_variant	missense_variant	stop_gained		missense_variant	missense_variant		missense_variant	missense_variant			frameshift_variant	missense_variant		stop_gained		stop_gained		stop_gained	frameshift_variant	stop_gained	stop_gained	missense_variant		missense_variant		stop_gained	missense_variant
HP-82795	Late	Prostate	missense_variant			missense_variant			missense_variant	missense_variant						missense_variant	missense_variant			stop_gained		inframe_deletion			stop_gained	stop_gained												frameshift_variant	stop_gained				missense_variant			stop_gained
HP-82796	Late	Prostate	missense_variant	missense_variant	missense_variant	inframe_deletion		frameshift_variant		missense_variant			stop_gained	missense_variant	missense_variant	missense_variant	missense_variant	stop_gained	missense_variant			stop_gained	missense_variant		frameshift_variant	inframe_deletion		frameshift_variant			frameshift_variant			missense_variant				stop_gained	stop_gained	missense_variant			missense_variant					frameshift_variant	missense_variant
HP-82799	Late	Prostate	missense_variant	frameshift_variant	missense_variant			missense_variant	missense_variant							missense_variant			missense_variant														frameshift_variant								frameshift_variant
HP-82802	Late	Prostate		frameshift_variant	stop_gained	stop_gained	missense_variant	stop_gained	missense_variant	frameshift_variant	missense_variant	stop_gained	missense_variant	frameshift_variant	stop_gained	missense_variant	stop_gained		stop_gained	stop_gained	missense_variant	stop_gained	inframe_deletion	missense_variant	stop_gained	missense_variant	missense_variant		missense_variant	frameshift_variant	frameshift_variant	frameshift_variant	frameshift_variant	missense_variant	frameshift_variant	missense_variant	missense_variant	stop_gained	stop_gained	missense_variant		missense_variant	missense_variant	missense_variant	missense_variant	stop_gained	stop_gained	missense_variant	missense_variant
HP-82804	Late	Prostate	missense_variant	stop_gained	missense_variant	stop_gained		frameshift_variant	missense_variant			missense_variant	missense_variant		inframe_deletion	missense_variant	frameshift_variant	inframe_deletion	stop_gained	frameshift_variant	missense_variant	inframe_deletion	missense_variant	missense_variant	frameshift_variant		frameshift_variant	frameshift_variant			frameshift_variant	stop_gained		missense_variant		stop_gained	missense_variant	frameshift_variant	missense_variant	frameshift_variant		stop_gained			missense_variant		missense_variant
HP-82809	Late	Prostate		frameshift_variant	missense_variant	stop_gained	missense_variant	missense_variant			missense_variant	missense_variant	inframe_deletion		inframe_deletion	missense_variant	inframe_deletion	missense_variant		frameshift_variant	missense_variant	missense_variant	missense_variant	missense_variant		inframe_deletion	missense_variant		stop_gained	missense_variant		stop_gained		missense_variant		stop_gained	missense_variant	frameshift_variant				missense_variant	missense_variant	stop_gained	missense_variant	stop_gained	stop_gained
HP-82814	Late	Prostate	missense_variant	stop_gained	missense_variant			missense_variant			missense_variant	frameshift_variant	stop_gained	frameshift_variant	stop_gained	missense_variant	stop_gained	frameshift_variant	stop_gained	missense_variant	stop_gained	stop_gained	stop_gained	frameshift_variant	frameshift_variant	stop_gained	frameshift_variant		missense_variant	stop_gained		missense_variant		frameshift_variant	missense_variant	frameshift_variant		missense_variant	stop_gained	missense_variant	frameshift_variant	missense_variant	missense_variant	missense_variant	missense_variant	stop_gained	missense_variant	missense_variant	missense_variant
HP-82815	Late	Prostate	missense_variant	frameshift_variant		inframe_deletion	missense_variant	frameshift_variant		missense_variant						missense_variant				frameshift_variant		frameshift_variant					frameshift_variant	frameshift_variant	inframe_deletion		frameshift_variant							frameshift_variant				missense_variant				inframe_deletion			missense_variant
HP-82816	Late	Prostate																								missense_variant
HP-82817	Late	Prostate
HP-82820	Late	Prostate	missense_variant	stop_gained			missense_variant	stop_gained			missense_variant	stop_gained	missense_variant				missense_variant	missense_variant	stop_gained	missense_variant	missense_variant	frameshift_variant	stop_gained			stop_gained	missense_variant		stop_gained			stop_gained			missense_variant		missense_variant			stop_gained				missense_variant	frameshift_variant		stop_gained	missense_variant
HP-82823	Late	Prostate	missense_variant	missense_variant	missense_variant	stop_gained	missense_variant	missense_variant					missense_variant										stop_gained	missense_variant			frameshift_variant	frameshift_variant	missense_variant		frameshift_variant					missense_variant				missense_variant			missense_variant
HP-82824	Late	Prostate	missense_variant	stop_gained	stop_gained	missense_variant	missense_variant	stop_gained	missense_variant		missense_variant	missense_variant	missense_variant	missense_variant			stop_gained	missense_variant	stop_gained	missense_variant	missense_variant	missense_variant	stop_gained	missense_variant	frameshift_variant	missense_variant	missense_variant	frameshift_variant	missense_variant	missense_variant	frameshift_variant		frameshift_variant	missense_variant			missense_variant	stop_gained	missense_variant	missense_variant		missense_variant	missense_variant	missense_variant		missense_variant	missense_variant
HP-82827	Late	Prostate	missense_variant		missense_variant		missense_variant				stop_gained	stop_gained				missense_variant			missense_variant		missense_variant	stop_gained			frameshift_variant						frameshift_variant																missense_variant
HP-82828	Late	Prostate	frameshift_variant	frameshift_variant		stop_gained	missense_variant	stop_gained		missense_variant	missense_variant	stop_gained	stop_gained		missense_variant		frameshift_variant	missense_variant	missense_variant	missense_variant	stop_gained	frameshift_variant	frameshift_variant	stop_gained	frameshift_variant	stop_gained	missense_variant		frameshift_variant	stop_gained	frameshift_variant	stop_gained	frameshift_variant	missense_variant		stop_gained	missense_variant		missense_variant	missense_variant		missense_variant	missense_variant	missense_variant	missense_variant	frameshift_variant		missense_variant
HP-82829	Late	Prostate		frameshift_variant	missense_variant	stop_gained	missense_variant			missense_variant			missense_variant															frameshift_variant			frameshift_variant		frameshift_variant	missense_variant													missense_variant
HP-82831	Late	Prostate	missense_variant	frameshift_variant		inframe_deletion	missense_variant	frameshift_variant	missense_variant	frameshift_variant	missense_variant	stop_gained	missense_variant		frameshift_variant	missense_variant	frameshift_variant	inframe_deletion		missense_variant	missense_variant	stop_gained	stop_gained		missense_variant	missense_variant		frameshift_variant	missense_variant		frameshift_variant			frameshift_variant	inframe_deletion		missense_variant					frameshift_variant				stop_gained	frameshift_variant	stop_gained
HP-82833	Late	Prostate				missense_variant																														missense_variant
HP-82835	Late	Prostate	missense_variant	frameshift_variant		missense_variant	missense_variant			missense_variant				missense_variant	frameshift_variant													frameshift_variant
HP-82836	Late	Prostate	missense_variant	frameshift_variant	missense_variant	missense_variant	missense_variant	missense_variant		missense_variant							frameshift_variant							frameshift_variant	frameshift_variant						frameshift_variant		frameshift_variant		frameshift_variant				missense_variant		frameshift_variant								frameshift_variant
HP-82837	Late	Prostate	missense_variant		missense_variant	missense_variant	missense_variant									missense_variant		inframe_deletion										frameshift_variant			frameshift_variant		frameshift_variant								frameshift_variant
HP-82840	Late	Prostate	missense_variant			missense_variant		stop_gained	frameshift_variant	missense_variant	missense_variant	missense_variant	missense_variant	frameshift_variant		missense_variant				frameshift_variant	missense_variant	stop_gained		missense_variant	frameshift_variant		missense_variant				frameshift_variant	inframe_deletion		frameshift_variant	frameshift_variant			frameshift_variant	stop_gained		inframe_deletion	missense_variant		stop_gained		inframe_deletion
HP-82842	Late	Prostate	missense_variant	frameshift_variant	missense_variant	frameshift_variant		stop_gained	missense_variant		stop_gained	stop_gained	frameshift_variant	frameshift_variant	inframe_deletion	missense_variant	inframe_deletion	missense_variant	stop_gained	missense_variant	stop_gained	stop_gained	frameshift_variant	frameshift_variant	stop_gained	frameshift_variant	frameshift_variant	frameshift_variant	missense_variant	stop_gained		missense_variant		frameshift_variant	frameshift_variant	missense_variant	missense_variant	inframe_deletion	frameshift_variant	missense_variant		missense_variant	missense_variant	stop_gained	frameshift_variant	missense_variant	missense_variant	frameshift_variant	frameshift_variant
HP-82843	Early/Intermediate	Prostate		frameshift_variant	missense_variant		missense_variant								frameshift_variant	missense_variant		missense_variant		missense_variant					frameshift_variant			frameshift_variant										missense_variant	missense_variant		frameshift_variant		missense_variant
HP-82844	Late	Prostate	missense_variant	frameshift_variant	missense_variant	inframe_deletion	missense_variant	stop_gained	missense_variant	missense_variant	missense_variant	frameshift_variant	frameshift_variant	frameshift_variant	inframe_deletion	missense_variant	missense_variant		inframe_deletion	inframe_deletion		missense_variant	stop_gained	missense_variant	frameshift_variant	missense_variant	missense_variant	frameshift_variant	missense_variant		missense_variant		frameshift_variant			frameshift_variant		frameshift_variant	missense_variant	missense_variant	inframe_deletion		missense_variant	missense_variant	missense_variant				missense_variant
HP-82845	Late	Prostate	missense_variant	frameshift_variant	missense_variant				missense_variant	missense_variant					missense_variant						missense_variant							frameshift_variant						frameshift_variant				inframe_deletion	missense_variant		frameshift_variant					inframe_deletion
HP-82846	Early/Intermediate	Prostate			missense_variant	missense_variant	missense_variant		missense_variant	missense_variant				missense_variant	frameshift_variant	missense_variant															frameshift_variant		frameshift_variant								frameshift_variant
HP-82848	Late	Prostate			missense_variant	frameshift_variant								missense_variant											frameshift_variant																	frameshift_variant
HP-82850	Early/Intermediate	Prostate	missense_variant	frameshift_variant	missense_variant	missense_variant			missense_variant	missense_variant						missense_variant												frameshift_variant													frameshift_variant
HP-82852	Late	Prostate	missense_variant		missense_variant	stop_gained		missense_variant	frameshift_variant	missense_variant	missense_variant	missense_variant		frameshift_variant	frameshift_variant	missense_variant	stop_gained	frameshift_variant	missense_variant		missense_variant		inframe_deletion	frameshift_variant	frameshift_variant	missense_variant	missense_variant	frameshift_variant	inframe_deletion	stop_gained	frameshift_variant	frameshift_variant	frameshift_variant	missense_variant	inframe_deletion	missense_variant			frameshift_variant	missense_variant		missense_variant		missense_variant	missense_variant	missense_variant		inframe_deletion	frameshift_variant
HP-82854	Early/Intermediate	Prostate	missense_variant	frameshift_variant	missense_variant	missense_variant	missense_variant	frameshift_variant	missense_variant			frameshift_variant		missense_variant			frameshift_variant	stop_gained	missense_variant									missense_variant					frameshift_variant		frameshift_variant						frameshift_variant								frameshift_variant
HP-82857	Late	Prostate	missense_variant	frameshift_variant	missense_variant		missense_variant	frameshift_variant		missense_variant	inframe_deletion	missense_variant	inframe_deletion	missense_variant	inframe_deletion	missense_variant		frameshift_variant	inframe_deletion	frameshift_variant		stop_gained			frameshift_variant			frameshift_variant	missense_variant	missense_variant		frameshift_variant	frameshift_variant		frameshift_variant	missense_variant	missense_variant	frameshift_variant		missense_variant			stop_gained	missense_variant	frameshift_variant		frameshift_variant	missense_variant	missense_variant
HP-82858	Late	Prostate	missense_variant		missense_variant	frameshift_variant	missense_variant	frameshift_variant	missense_variant	missense_variant		frameshift_variant	missense_variant	missense_variant	missense_variant		missense_variant						missense_variant			missense_variant		frameshift_variant			frameshift_variant		frameshift_variant					missense_variant		missense_variant									missense_variant
HP-82859	Early/Intermediate	Prostate		frameshift_variant	missense_variant	stop_gained		stop_gained	missense_variant	missense_variant	missense_variant	missense_variant	missense_variant	missense_variant			frameshift_variant	missense_variant	missense_variant						frameshift_variant		missense_variant			missense_variant	missense_variant		frameshift_variant			stop_gained	missense_variant		stop_gained				missense_variant	missense_variant				stop_gained	frameshift_variant
HP-82860	Late	Prostate	frameshift_variant	frameshift_variant			missense_variant	missense_variant	missense_variant	missense_variant			missense_variant	frameshift_variant	missense_variant		stop_gained	frameshift_variant		missense_variant		missense_variant	stop_gained	missense_variant	stop_gained	missense_variant	frameshift_variant					frameshift_variant				stop_gained	missense_variant			frameshift_variant				missense_variant	frameshift_variant			stop_gained
HP-82861	Late	Prostate	missense_variant	missense_variant	frameshift_variant	inframe_deletion		stop_gained	missense_variant	missense_variant	inframe_deletion		missense_variant		missense_variant		missense_variant		stop_gained	frameshift_variant	missense_variant	frameshift_variant		missense_variant		missense_variant		frameshift_variant	frameshift_variant		frameshift_variant		frameshift_variant		inframe_deletion					stop_gained		missense_variant					missense_variant
HP-82862	Early/Intermediate	Prostate	inframe_deletion	frameshift_variant			missense_variant	frameshift_variant		missense_variant	missense_variant	missense_variant	stop_gained	frameshift_variant	stop_gained	missense_variant	inframe_deletion		missense_variant	missense_variant	missense_variant	missense_variant					missense_variant	frameshift_variant		stop_gained		missense_variant	frameshift_variant			stop_gained							frameshift_variant		missense_variant	missense_variant	missense_variant
HP-82863	Late	Prostate	frameshift_variant		missense_variant	missense_variant	missense_variant	frameshift_variant	missense_variant	missense_variant	inframe_deletion	missense_variant	stop_gained	missense_variant	missense_variant			inframe_deletion			missense_variant	inframe_deletion	inframe_deletion	frameshift_variant	frameshift_variant					missense_variant		stop_gained	frameshift_variant				frameshift_variant	frameshift_variant				missense_variant	stop_gained			stop_gained	missense_variant	frameshift_variant
HP-82864	Late	Prostate			missense_variant		missense_variant		missense_variant	missense_variant				missense_variant		missense_variant									frameshift_variant	missense_variant												frameshift_variant
HP-82865	Late	Prostate	missense_variant	missense_variant	missense_variant		missense_variant	frameshift_variant			missense_variant	stop_gained	inframe_deletion			missense_variant	inframe_deletion	missense_variant		missense_variant	frameshift_variant	inframe_deletion		missense_variant		missense_variant		frameshift_variant	frameshift_variant	stop_gained	frameshift_variant	stop_gained	frameshift_variant		frameshift_variant		frameshift_variant	frameshift_variant	stop_gained		frameshift_variant	frameshift_variant			missense_variant	missense_variant		inframe_deletion	frameshift_variant
HP-82866	Late	Prostate		stop_gained	stop_gained	missense_variant	missense_variant	missense_variant	missense_variant		frameshift_variant	missense_variant	frameshift_variant	frameshift_variant		missense_variant	stop_gained	inframe_deletion	inframe_deletion	missense_variant	frameshift_variant	missense_variant		missense_variant	frameshift_variant	missense_variant			missense_variant	stop_gained	frameshift_variant	stop_gained		missense_variant		missense_variant	missense_variant	frameshift_variant	missense_variant		frameshift_variant	missense_variant	frameshift_variant	missense_variant	stop_gained		frameshift_variant	missense_variant	missense_variant
HP-82867	Late	Prostate	stop_gained		missense_variant	missense_variant	missense_variant	missense_variant	stop_gained	missense_variant	missense_variant	stop_gained	stop_gained	frameshift_variant	stop_gained	missense_variant	frameshift_variant	inframe_deletion	missense_variant	missense_variant	missense_variant	missense_variant	missense_variant	missense_variant	frameshift_variant	inframe_deletion		frameshift_variant	missense_variant	missense_variant	stop_gained		frameshift_variant	frameshift_variant	frameshift_variant	stop_gained	missense_variant	frameshift_variant	missense_variant	stop_gained		missense_variant	frameshift_variant	stop_gained				stop_gained	missense_variant
HP-82869	Late	Prostate	missense_variant	stop_gained	missense_variant	stop_gained	missense_variant	stop_gained	frameshift_variant	missense_variant	missense_variant	stop_gained	missense_variant	frameshift_variant	missense_variant		missense_variant		missense_variant	missense_variant	stop_gained	stop_gained		missense_variant	frameshift_variant	missense_variant	missense_variant		frameshift_variant		frameshift_variant		frameshift_variant	frameshift_variant			missense_variant		frameshift_variant	stop_gained	frameshift_variant	frameshift_variant			frameshift_variant	stop_gained	missense_variant		missense_variant
HP-82870	Late	Prostate	missense_variant	stop_gained	missense_variant	missense_variant	missense_variant	frameshift_variant	missense_variant	missense_variant	frameshift_variant		stop_gained		missense_variant		stop_gained	frameshift_variant	missense_variant	frameshift_variant	missense_variant		stop_gained	missense_variant	frameshift_variant	missense_variant		frameshift_variant	frameshift_variant	missense_variant	frameshift_variant	inframe_deletion				missense_variant	missense_variant		missense_variant	missense_variant	frameshift_variant	missense_variant	missense_variant				stop_gained	missense_variant	frameshift_variant
HP-82871	Late	Prostate		stop_gained	stop_gained	missense_variant		missense_variant	missense_variant		stop_gained			frameshift_variant		missense_variant	stop_gained			frameshift_variant	stop_gained	missense_variant	inframe_deletion	stop_gained	stop_gained	missense_variant	missense_variant	frameshift_variant		missense_variant	frameshift_variant			missense_variant				stop_gained	stop_gained	stop_gained		missense_variant	missense_variant	frameshift_variant	frameshift_variant		missense_variant	frameshift_variant	missense_variant
HP-82873	Late	Prostate	missense_variant	stop_gained	missense_variant	stop_gained			missense_variant	missense_variant	missense_variant	missense_variant	stop_gained	frameshift_variant	missense_variant	missense_variant	missense_variant		stop_gained		missense_variant	stop_gained			frameshift_variant	missense_variant	frameshift_variant		missense_variant	stop_gained	frameshift_variant	stop_gained	missense_variant	frameshift_variant	frameshift_variant	missense_variant	missense_variant	frameshift_variant			missense_variant		frameshift_variant	stop_gained	missense_variant	inframe_deletion	frameshift_variant	missense_variant
HP-82874	Early/Intermediate	Prostate	missense_variant	frameshift_variant	missense_variant	inframe_deletion	missense_variant	frameshift_variant			missense_variant					missense_variant					missense_variant			missense_variant	frameshift_variant			frameshift_variant			frameshift_variant		frameshift_variant	frameshift_variant	frameshift_variant	frameshift_variant	missense_variant	frameshift_variant	missense_variant										frameshift_variant
HP-82876	Late	Prostate		stop_gained	missense_variant	stop_gained	missense_variant	missense_variant	missense_variant	missense_variant	missense_variant	missense_variant	stop_gained		stop_gained	missense_variant		missense_variant	stop_gained	missense_variant	missense_variant	missense_variant		frameshift_variant	stop_gained			frameshift_variant	missense_variant	missense_variant	frameshift_variant	frameshift_variant		frameshift_variant	stop_gained	stop_gained	missense_variant	frameshift_variant		missense_variant			frameshift_variant		missense_variant	stop_gained	frameshift_variant	missense_variant	missense_variant
HP-82878	Late	Prostate	stop_gained		missense_variant	missense_variant	missense_variant	frameshift_variant	missense_variant	missense_variant			inframe_deletion			missense_variant	frameshift_variant	frameshift_variant		frameshift_variant		frameshift_variant					frameshift_variant	frameshift_variant				missense_variant	inframe_deletion	frameshift_variant	frameshift_variant		frameshift_variant	missense_variant			frameshift_variant			missense_variant				frameshift_variant
HP-82880	Late	Prostate	missense_variant	stop_gained	frameshift_variant	missense_variant		missense_variant	missense_variant	missense_variant			missense_variant				missense_variant		stop_gained	stop_gained	frameshift_variant		stop_gained			missense_variant	frameshift_variant			missense_variant					frameshift_variant	stop_gained		missense_variant	stop_gained								missense_variant
HP-82881	Early/Intermediate	Prostate	missense_variant		missense_variant	frameshift_variant	missense_variant		missense_variant	missense_variant	missense_variant	stop_gained	missense_variant	missense_variant		missense_variant	stop_gained	stop_gained	missense_variant	missense_variant	missense_variant	missense_variant	missense_variant	stop_gained	frameshift_variant		missense_variant	frameshift_variant		stop_gained			frameshift_variant	missense_variant	missense_variant		missense_variant	frameshift_variant	frameshift_variant		frameshift_variant	frameshift_variant	missense_variant	missense_variant	missense_variant	missense_variant			missense_variant
HP-82882	Late	Prostate	missense_variant	frameshift_variant	frameshift_variant	stop_gained		frameshift_variant	missense_variant	missense_variant	stop_gained	stop_gained	inframe_deletion		stop_gained		missense_variant	missense_variant	stop_gained	missense_variant	missense_variant	inframe_deletion	stop_gained			missense_variant	frameshift_variant		missense_variant	frameshift_variant	frameshift_variant	frameshift_variant		frameshift_variant	frameshift_variant	frameshift_variant	missense_variant		stop_gained	stop_gained		missense_variant	frameshift_variant		frameshift_variant	stop_gained	frameshift_variant	stop_gained
HP-82883	Late	Prostate	missense_variant								stop_gained	missense_variant	missense_variant	frameshift_variant	missense_variant	missense_variant		missense_variant	missense_variant	missense_variant	missense_variant	stop_gained	missense_variant			missense_variant	missense_variant					missense_variant	frameshift_variant		missense_variant	missense_variant	missense_variant			missense_variant		missense_variant	missense_variant				frameshift_variant	missense_variant	missense_variant
HP-82884	Late	Prostate	missense_variant	frameshift_variant	missense_variant	stop_gained	missense_variant	stop_gained			frameshift_variant	frameshift_variant	stop_gained	missense_variant	stop_gained		stop_gained	missense_variant	missense_variant	frameshift_variant	stop_gained	stop_gained	inframe_deletion	missense_variant	frameshift_variant	stop_gained	missense_variant	frameshift_variant	stop_gained			frameshift_variant		missense_variant	frameshift_variant	stop_gained				missense_variant	missense_variant		frameshift_variant	frameshift_variant	stop_gained		missense_variant		missense_variant
HP-82887	Late	Prostate	missense_variant			missense_variant	missense_variant																				frameshift_variant
HP-82889	Late	Prostate		frameshift_variant	missense_variant				missense_variant						frameshift_variant	missense_variant					missense_variant	missense_variant		stop_gained				frameshift_variant													frameshift_variant
HP-82890	Late	Prostate			missense_variant		missense_variant		missense_variant	missense_variant				missense_variant	missense_variant			missense_variant													frameshift_variant	frameshift_variant	frameshift_variant								frameshift_variant							inframe_deletion
HP-82891	Late	Prostate	missense_variant	frameshift_variant	missense_variant	missense_variant			frameshift_variant	missense_variant				missense_variant	missense_variant	missense_variant									frameshift_variant		frameshift_variant														frameshift_variant		missense_variant
HP-82892	Late	Prostate	missense_variant		missense_variant		missense_variant		missense_variant				inframe_deletion	missense_variant												missense_variant		frameshift_variant					frameshift_variant								frameshift_variant
HP-82893	Late	Prostate	missense_variant		missense_variant	frameshift_variant		frameshift_variant		missense_variant		inframe_deletion	stop_gained			missense_variant	inframe_deletion	frameshift_variant						frameshift_variant	frameshift_variant	stop_gained		frameshift_variant			frameshift_variant						frameshift_variant	frameshift_variant			frameshift_variant			frameshift_variant
HP-82895	Mets	Lymph Node		missense_variant	missense_variant	missense_variant	missense_variant	missense_variant	missense_variant	missense_variant	missense_variant	stop_gained	stop_gained	missense_variant	inframe_deletion	missense_variant	frameshift_variant		missense_variant	missense_variant	missense_variant		missense_variant	missense_variant			frameshift_variant	frameshift_variant	missense_variant	missense_variant	frameshift_variant	missense_variant	frameshift_variant	stop_gained	frameshift_variant	missense_variant	missense_variant			frameshift_variant	frameshift_variant		frameshift_variant	missense_variant	stop_gained	stop_gained	stop_gained
HP-82896	Mets	Lymph Node	missense_variant		stop_gained	missense_variant		missense_variant	missense_variant	missense_variant	stop_gained	missense_variant	stop_gained	frameshift_variant	missense_variant		frameshift_variant	missense_variant	stop_gained	frameshift_variant	missense_variant				frameshift_variant	missense_variant			frameshift_variant	stop_gained	missense_variant	stop_gained	missense_variant	missense_variant	stop_gained	stop_gained		frameshift_variant	missense_variant		frameshift_variant	missense_variant				stop_gained	stop_gained	inframe_deletion	missense_variant
HP-82897	Mets	Lymph Node		stop_gained	missense_variant		missense_variant				missense_variant	stop_gained	missense_variant		missense_variant		stop_gained		stop_gained	missense_variant	stop_gained		inframe_deletion		frameshift_variant				missense_variant	missense_variant	stop_gained	frameshift_variant	frameshift_variant		inframe_deletion	missense_variant		frameshift_variant	frameshift_variant	missense_variant	inframe_deletion			stop_gained	missense_variant				frameshift_variant
HP-82899	Mets	Lymph Node	stop_gained	frameshift_variant	missense_variant		missense_variant	stop_gained		missense_variant				missense_variant	missense_variant	missense_variant	stop_gained	missense_variant	missense_variant			stop_gained	missense_variant	missense_variant									frameshift_variant	missense_variant	frameshift_variant	frameshift_variant	missense_variant	frameshift_variant	missense_variant	missense_variant	frameshift_variant	missense_variant		stop_gained		missense_variant
[truncated: 85 more columns]
